# 1    **The novel Rab5 effector FERRY links early endosomes** 2    **with the translation machinery**

3    **J. S. Schuhmacher<sup>1</sup>, S. tom Dieck<sup>2</sup>, S. Christoforidis<sup>3,4</sup>, C. Landerer<sup>1</sup>, J. Davila Gallesio<sup>5</sup>**  
4    **L. Hersemann<sup>1</sup>, S. Seifert<sup>1</sup>, R. Schäfer<sup>1</sup>, A. Giner<sup>1</sup>, A. Toth-Petroczy<sup>1</sup>, Y. Kalaidzidis<sup>1,6</sup>,**  
5    **K. E. Bohnsack<sup>5</sup>, M. T. Bohnsack<sup>5,7</sup>, E. M. Schuman<sup>2</sup>, M. Zerial<sup>1\*</sup>.**

6    <sup>1</sup>Max Planck Institute of Molecular Cell Biology and Genetics, Pfotenhauerstrasse 108, 01307, Dresden,  
7    Germany.

8    <sup>2</sup>Max Planck Institute for Brain Research, Max-von-Laue-Str. 4, 60438 Frankfurt am Main, Germany.

9    <sup>3</sup>Biomedical Research Institute, Foundation for Research and Technology, 45110 Ioannina, Greece.

10    <sup>4</sup>Laboratory of Biological Chemistry, Department of Medicine, School of Health Sciences, University of Ioannina,  
11    45110 Ioannina, Greece.

12    <sup>5</sup>Department of Molecular Biology, University Medical Center Göttingen, Humboldtallee 23, 37073 Göttingen,  
13    Germany

14    <sup>6</sup>Faculty of Bioengineering and Bioinformatics, Moscow State University, Moscow, Russia.

15    <sup>7</sup>Göttingen Centre for Molecular Biosciences, University of Göttingen, Justus-von-Liebig-Weg 11, 37077  
16    Göttingen, Germany

17    \*Correspondence: [zerial@mpi-cbg.de](mailto:zerial@mpi-cbg.de)

18

19

## 20    **Abstract**

21    Localized translation is vital to polarized cells and requires precise and robust distribution of  
22    different mRNAs and ribosomes across the cell. However, the underlying molecular  
23    mechanisms are poorly understood and important players are lacking. Here we show that the  
24    novel Rab5 effector Five-subunit Endosomal Rab5 and RNA/ribosome intermediarY, FERRY  
25    complex recruits mRNAs and ribosomes to early endosomes, through direct mRNA  
26    interaction. FERRY displays preferential binding to certain groups of transcripts, including  
27    mRNAs encoding mitochondrial proteins. Deletion of FERRY subunits reduces the endosomal  
28    localization of transcripts in cells and has a significant impact on mRNA and protein levels.  
29    Clinical studies show that genetic disruption of FERRY causes severe brain damage. We found  
30    that, in neurons, FERRY co-localizes with mRNA on early endosomes and mRNA loaded  
31    FERRY-positive endosomes are in close proximity of mitochondria. FERRY thus transforms  
32    endosomes into mRNA carriers and plays a key role in regulating mRNA distribution and  
33    transport.

34

## 35 Introduction

36 Subcellular mRNA localization and protein translation is vital for fundamental biological  
37 processes, such as embryonic development, cellular homeostasis, neuronal plasticity and  
38 adaptive response to environmental cues (Cioni et al., 2018; Das et al., 2021; Glock et al., 2017;  
39 Martin and Ephrussi, 2009; Turner-Bridger et al., 2020). While the asymmetric localization of  
40 specific mRNAs during oogenesis (Becalska and Gavis, 2009; Riechmann and Ephrussi, 2001)  
41 represents a morphologically simple example, a completely different scenario unfolds in the  
42 brain, where neurons span long distances with their axonal and dendritic processes. Not only  
43 are these compartments highly specialized in their function, but they also respond to external  
44 cues on a millisecond timescale at the distal end of their network, far away from the cell body.  
45 Neurons handle these challenges by producing several proteins at their site of action through  
46 local translation, which is involved in axon outgrowth, branching synaptogenesis, regeneration  
47 and neuronal plasticity (Cioni et al., 2018; Jung et al., 2014; Kim and Jung, 2020; Rangaraju  
48 et al., 2017). Local translation implies the availability of the mRNAs at the sites of respective  
49 protein function, and hence the precise subcellular localization of a plethora of mRNAs (Glock  
50 et al., 2017; Turner-Bridger et al., 2020).

51 The correct transport and subcellular localization of mRNAs requires a sophisticated molecular  
52 regulation tailored to the specific roles of the mRNAs and their encoded products.  
53 Transcriptomic studies have identified thousands of different mRNAs in neuronal sub-  
54 compartments, such as axons, dendrites or the neuropil (Andreassi et al., 2010; Briese et al.,  
55 2016; Cajigas et al., 2012). Furthermore, these transcripts are distributed heterogeneously with  
56 mRNAs showing distinct localization patterns, for example, being restricted to axons or  
57 dendrites or even smaller sub-compartments. These findings reflect the existence of a complex  
58 mRNA distribution plan where thousands of mRNAs have to find their correct location.

59 Such a complex task and long distances, especially in neurons, are incompatible with a passive  
60 diffusion-based mechanism and require active mRNA transport along the cytoskeleton. A  
61 direct connection between RNA-binding proteins (RBPs) and motors proteins has been  
62 observed in various forms, for example the targeting of mRNAs by RBPs that recognize *cis*-  
63 regulatory elements on the respective mRNA, including the so called ‘zipcodes’ (reviewed in:  
64 (Buxbaum et al., 2015; Das et al., 2021)). Recently, different compartments of the  
65 endolysosomal system have been associated with the spatial organization of components of the  
66 translation machinery, including mRNAs, mRNP granules and ribosomes in various organisms  
67 (Cioni et al., 2019; Higuchi et al., 2014; Liao et al., 2019). The endolysosomal system acts as  
68 a central logistic system of eukaryotic cells, comprising multiple membrane-enclosed  
69 organelles, such as early endosomes (EE), late endosomes and lysosomes, which traffic and  
70 sort a large variety of cargos.

71 It is ideally suited to regulate mRNA transport and localization, especially in morphologically  
72 complex and spatially segregated compartments, like the hyphae of fungi or the processes of

73 neurons. In the fungus *U. maydis*, a special adaptor system enables the long-distance transport  
74 of mRNAs and polysomes on EEs (Higuchi et al., 2014). In higher eukaryotes, lysosomes serve  
75 as an Annexin A11-mediated mRNP granule transport vehicle, while late endosomes act as  
76 translation platforms for mitochondrial proteins in neurons (Cioni et al., 2019; Liao et al.,  
77 2019).

78 A recent study reported the co-localization of mRNAs to EEs, suggesting that they may also  
79 be part of an mRNA distribution machinery (Popovic et al., 2020). The EE is an early sorting  
80 station for cargos coming from the plasma membrane, which are routed towards recycling or  
81 degradation. EEs appear more suitable to support directional mRNA transport than late  
82 endosomes, due to their bidirectional motility in neurons (Goto-Silva et al., 2019) whereas late  
83 endosomes (multi-vesicular bodies) primarily migrate retrograde (Parton et al., 1992). The  
84 identity of endosomes is determined by an intricate interplay between proteins and specific  
85 lipids that are intimately linked to Rab GTPases (Pfeffer, 2013; Wandinger-Ness and Zerial,  
86 2014). Different Rab GTPases characterize different endocytic organelles, such as Rab4 and  
87 Rab11 recycling endosomes and Rab7 late endosomes (reviewed in: (Wandinger-Ness and  
88 Zerial, 2014)). Rab5 is the hallmark GTPase of the EE and a membrane organizer. Upon  
89 activation from the GDP- to the GTP-bound form on the EE, Rab5 recruits a plethora of Rab5  
90 effectors, such as the molecular tether EEA1 (Christoforidis et al., 1999) or Rabankyrin-5  
91 (Schnatwinkel et al., 2004), thereby orchestrating different functions of the organelle (Cezanne  
92 et al., 2020; Franke et al., 2019; Lauer et al., 2019; Lippe et al., 2001; Murray et al., 2016). To  
93 date, the molecular mechanism describing the connection between EEs and mRNAs or the  
94 translation machinery remains mysterious. No known mRNA-associated protein appears to  
95 localize on EEs nor do any endosomal proteins exhibit classical RNA-binding motifs.  
96 Considering the large number of precisely localized mRNAs, a versatile molecular machine  
97 able to discriminate between different mRNAs and transport specific mRNA subgroups would  
98 be efficient and only use a limited number of carriers.

99 Closing this gap, we report the discovery of a novel five-subunit Rab5 effector complex, which  
100 we named Five-subunit Endosomal Rab5 and RNA/ribosome intermediarY, FERRY complex.  
101 Through direct interaction with Rab5 and mRNAs, it connects the EE with the translation  
102 machinery and is important for mRNA distribution and transport.

103

## 104 **Results**

### 105 **Identification of a novel Rab5 effector complex**

106 In previous studies, we isolated Rab5 effectors using a Rab5 affinity chromatography  
107 (Christoforidis et al., 1999). Upon further purification of this elaborate set of proteins, we  
108 observed five proteins co-fractionating in size exclusion chromatography (SEC) ([Figure S1A](#),  
109 [left panel](#)). Further purification using ionic charges resulted in co-elution of the same set of  
110 five proteins ([Figure S1A](#), [right panel](#)). The co-fractionation during both chromatography steps

111 indicated that these proteins form a complex, raising a great interest regarding its identity and  
112 function. Mass spectrometry revealed the five proteins as Tbck (101 kDa), Ppp1r21 (88 kDa),  
113 C12orf4 (64 kDa), Cryz11 (39 kDa) and Gatd1 (23 kDa) (Figure 1A). For clarity, we will refer  
114 to the novel complex as the Five-subunit Endosomal Rab5 and RNA/ribosome intermediarY  
115 (FERRY) complex, with the individual subunits being designated Fy-1 – Fy-5 (Figure 1A).

116 In a first step, we successfully reconstituted the FERRY complex *in vitro*. Figure 1B shows  
117 that the five proteins form a stable complex, as they all elute as a single peak from SEC. To  
118 estimate the stoichiometry of the components in the complex, we compared the intensity of the  
119 corresponding signals of a Coomassie-stained SDS PAGE, which suggested a ratio of 1:2:1:2:4  
120 for Fy-1:Fy-2:Fy-3:Fy-4:Fy-5, respectively. Using mass photometry, we obtained a molecular  
121 weight of  $525 \pm 41$  kDa for the FERRY complex which fits very well with the estimated ratios  
122 and a calculated molecular weight of 521 kDa (Figure S1B). This was further corroborated by  
123 a cryoEM structure which showed a ratio of 2:2:4 for Fy-2, Fy-4 and Fy-5 (Quentin et al.,  
124 2021). With the FERRY complex in hand, we tested whether it fulfills the typical criterion of  
125 Rab5 effectors and binds predominantly to the activated, GTP-loaded Rab5, by performing a  
126 Glutathione-S-transferase (GST) pulldown assay. Sodium dodecylsulfate polyacrylamide gel  
127 electrophoresis (SDS PAGE) and Western blot analysis of different FERRY subunits (Fy-2,  
128 Fy-3, Fy-4) revealed a much stronger signal for Rab5:GTP $\gamma$ S than Rab5:GDP, indicating that  
129 the FERRY complex interacts preferentially with activated Rab5 (Figure 1C, Figure S1D).

130 We next tested the specificity of the FERRY complex subunits for different endosomal Rab  
131 GTPases, by performing binding assays of *in vitro* translated, <sup>35</sup>S methionine labelled Fy-1 to  
132 Fy-5 against Rab5, Rab4, Rab7 and Rab11 (Figure 1D). In this experimental set up, the binding  
133 of each component of the complex was tested individually, in the absence of the other subunits,  
134 thereby allowing identification of the subunit(s) of the complex that mediate binding between  
135 the FERRY complex and Rab5. Out of the five subunits, only Fy-2 bound to Rab5:GTP, but  
136 not Rab5:GDP (Figure 1D). In addition, no interaction was observed between the FERRY  
137 complex and the other Rab GTPases, neither in the GDP- nor GTP-bound form. These results  
138 indicate that Fy-2 mediates the interaction between the FERRY complex and Rab5:GTP, but  
139 none of the endosomal Rab GTPases tested. This was also confirmed by hydrogen deuterium  
140 exchange mass spectrometry (HDX-MS), which identified the Rab5 binding site of the FERRY  
141 complex near the C-terminus of Fy-2 (Quentin et al., 2021). These results indicate that the  
142 FERRY complex is indeed a Rab5 effector.

143

## 144 **The FERRY complex localizes to EEs**

145 The aforementioned specificity of the FERRY complex for Rab5 suggests that it may localize  
146 to EEs. The localization of endogenous FERRY complex requires antibodies suitable for  
147 immunofluorescence. We were able to raise antibodies against the subunits Fy-2 and Fy-4 that  
148 are suitable for immunofluorescence (Figure S1C, see also Methods: Antibody validation). The

149 overall appearance of the fluorescence signal of Fy-2 and Fy-4 revealed a punctate localization  
150 pattern in HeLa cells that resembles the distribution of EEs (Figure 1E). As expected, Fy-2 co-  
151 localize very well with Fy-4 (0.85) but also with the early endosomal markers Rabankyrin-5  
152 (0.87) and EEA1 (0.76) (Figure S1E), suggesting that the FERRY complex localizes to EEs.  
153 To determine whether the FERRY complex is indeed a stable protein complex in cells, we  
154 generated HeLa knock-out (KO) cell lines of the FERRY subunits Fy-1, Fy-2, Fy-4 and Fy-5  
155 using CRISPR/Cas9 technology. Loss of the respective protein was confirmed by Western blot  
156 analysis (Figure S1F), which also showed that the levels of Fy-3 were reduced upon *fy-2* KO  
157 (80%) and *fy-1* KO (20%) (Figure S1F). Subsequently, we assessed the localization of Fy-2  
158 and Fy-4 under these conditions by counting the number of fluorescent structures co-localizing  
159 with the EE marker Rabenkyrin-5. The localization of Fy-2 was not significantly changed,  
160 except in the *fy-2* KO cell lines. However, in case of Fy-4 we observed a complete loss of EE  
161 co-localization in the *fy-2* and *fy-4* KO cell lines (Figure 1F). This is in agreement with  
162 biochemical and structural data that identified Fy-2 as mediator of the FERRY Rab5 interaction  
163 and, thus to the EE.

164 The five FERRY subunits exhibit a substantial variability in size, domain composition and  
165 structural features. Indeed, the FERRY complex does not resemble any known endosomal  
166 complex (e.g. CORVET/HOPS, or the ESCRT) (Figure 1A). Searching for traces of the  
167 FERRY complex in the course of evolution, we performed a phylogenetic analysis of the  
168 subunits of the FERRY complex. While Fy-1 is the most ancestral subunit with homologues in  
169 some fungi, we also found an assembly of Fy-1, Fy-3 and a short version of Fy-2 in insects and  
170 some nematodes. With the evolution of the Chordata, we observed a transition from a 3-  
171 component assembly to the five-subunit complex, via the co-occurrence of two novel proteins,  
172 Fy-4 and Fy-5 and the extension of Fy-2 with the Fy-4 and Fy-5 binding sites (Figure 1G, Table  
173 S1). This co-evolution further supports the formation of a complex by the FERRY subunits.

174

## 175 **The FERRY complex associates with the translation machinery**

176 Even though the FERRY complex has not previously been identified, it may play an important  
177 role in brain function. Clinical studies on patients with mutations in the *fy-1* or *fy-2* genes,  
178 showed that loss of either of these proteins severely impairs brain development and function,  
179 causing symptoms such as a mental retardation, intellectual disability, hypotonia, epilepsy, and  
180 dysmorphic facial features resulting in premature death of the patients (Bhoj et al., 2016; Chong  
181 et al., 2016; Guerreiro et al., 2016; Hancarova et al., 2019; Loddo et al., 2020; Ortiz-Gonzalez  
182 et al., 2018; Philips et al., 2017; Suleiman et al., 2018; Zapata-Aldana et al., 2019). Different  
183 studies report the accumulation of lipofuscin in the human brain and further indicate  
184 disturbances in the endocytic system (Beck-Wodl et al., 2018; Rehman et al., 2019). These  
185 results suggest that the FERRY complex carries out an endocytic function essential for brain  
186 development and neuronal function.

187 To gain insights into the cellular role of the FERRY complex, we examined its interaction  
188 network using a GST pulldown approach (Figure 2A). In a first step, we purified a GST fusion  
189 variant of the FERRY complex (GST-FERRY, Figure S2A). Subsequently, GST-FERRY was  
190 incubated with fresh HEK 293 cell lysate (see Methods: HEK 293 lysate preparation),  
191 stringently washed and eluted from the resin. Mass spectrometry of the elution fractions  
192 revealed 34 potential interaction partners of the FERRY complex (Figure 2B, Table S2).  
193 Almost three-quarters of the candidates (73.5%) represent ribosomal proteins of both the large  
194 and the small subunit (Figure 2C), suggesting that complete ribosomes and maybe the  
195 translation machinery may be associated with the FERRY complex. Due to their abundance,  
196 ribosomal proteins are frequent contaminants of such assays. To further test the ribosome  
197 association of FERRY, we generated stably transfected HEK293 cell lines in which expression  
198 of Flag-His-Fy-2 or Fy-2-His-Flag can be induced. Subsequently, cell lysates were fractionated  
199 using a sucrose gradient separating the small and the large ribosomal subunits, monosomes and  
200 polysomes from smaller complexes and free proteins and RNAs (Figure S2B). While the  
201 majority of Fy-2 was found to be non-ribosome-associated, a fraction of Fy-2 was also  
202 observed co-migrating with the different subunits, monosomes and a minor fraction was also  
203 detected with polysomes, supporting the hypothesis that the FERRY complex is able to  
204 associate with ribosomes in cells (Figure 2D).

205 The association of the FERRY complex with ribosomes prompted us to assess the spectrum of  
206 FERRY interactors further. We tested whether RNAs accompany the ribosomes and RNA-  
207 binding proteins as FERRY interactors. To identify transcripts co-eluting with the FERRY  
208 complex, we modified the protocol of the GST-FERRY pulldown assay to obtain RNA instead  
209 of proteins, which was subsequently analyzed by sequencing (Figure 2A). Applying a stringent  
210 cut-off (adjusted p-value ( $p_{adj}$ ) < 0.01), the experiment revealed 252 mRNAs significantly  
211 associated with the FERRY complex (Figure 2E, Table S2). Among these candidates, the  
212 largest group of mRNAs (66 transcripts/ 26.2%) constitute nuclear-encoded mitochondrial  
213 proteins. Furthermore, we also identified components of the endosomal system and  
214 nucleosome components (Figure 2F). A gene set enrichment analysis against a gene set  
215 collection (MSigDB C5 collection: ontology gene sets), revealed a strong enrichment for  
216 mitochondrial matrix genes (#1714), mitochondrial ribosome (#2354), cellular respiration  
217 (#480) and TCA cycle (#4413) components. In summary, these results suggest that the FERRY  
218 complex interacts with specific groups of mRNAs, especially those encoding mitochondrial  
219 proteins.

220

## 221 **The FERRY complex interacts directly with mRNA**

222 To test the hypothesis of a direct FERRY interaction with mRNA, we performed  
223 electrophoretic mobility shift assays (EMSA) with *in vitro* transcribed mRNAs. Initially, we  
224 chose *mrpl41*, a top candidate of the RNA screen and included the 5' untranslated region  
225 (UTR), the open reading frame (orf), the 3'-UTR and a short stretch of 50 adenines, yielding a

226 660-nucleotide, artificially poly-adenylated mRNA. With increasing amounts of *mrpl41*  
227 mRNA an additional signal at a higher molecular weight appeared in the EMSA, indicating a  
228 binding of the FERRY complex to the *mrpl41* mRNA (Figure 3A).

229 Next, we aimed at investigating whether the FERRY complex also directly interacts with RNA  
230 in cells. Therefore, we used UV-mediated protein-RNA cross-linking, which is a zero-distance  
231 cross-linking method that covalently attaches proteins to bound RNAs. We utilized the two  
232 HEK293 cell lines expressing Flag-His-Fy-2 and Fy-2-His-Flag, as the main RNA interface of  
233 the FERRY complex is located on Fy-2 (Quentin et al., 2021). After cross-linking, we isolated  
234 the Fy-2 tagged proteins by tandem affinity purifications under native (anti-Flag) and strongly  
235 denaturing ( $\text{Ni}^{2+}$  affinity) conditions and confirmed their correct size by Western blot (Figure  
236 3B). Furthermore, the isolated material was examined regarding the presence of cross-linked  
237 RNA. RNA visualization using  $^{32}\text{P}$  labelling after partial RNase digestion revealed a signal at  
238 the correct molecular weight for both Fy-2 variants, while the control lane with only the His-  
239 Flag sample was empty (Figure 3B). This experiment confirms a direct FERRY-RNA  
240 interaction in cells, which is mediated by Fy-2.

241 We further characterized the interaction using EMSA assays by testing whether the binding of  
242 the model mRNA *mrpl41* to the FERRY complex is Rab5-dependent. We performed EMSAs  
243 with a fixed FERRY/*mrpl41* mRNA ratio and added increasing amounts of Rab5:GTP $\gamma$ S to the  
244 assay. This did not have a visible effect on the FERRY-mRNA interaction, suggesting that  
245 Rab5 does not play a role in this process (Figure 3C).

246 The enrichment of specific subsets of mRNAs in the RNA screen points towards the ability of  
247 the FERRY complex to discriminate between different mRNAs. To examine the specificity of  
248 mRNA binding, we chose eight mRNAs from the 237 found in the screen, that encode proteins  
249 fulfilling different mitochondrial functions, such as components of the respiratory chain (*cox6b*  
250 and *cox8a*), the ATP Synthase (*atp5f1b*), the mitochondrial stress response (*gstp1* and *prdx5*),  
251 the mitochondrial ribosome (*mrpl41*), the TCA cycle (*mdh2*) and the mitochondrial  
252 ubiquitination machinery (*uchl1*), and tested their interaction with the FERRY complex using  
253 EMSAs. We additionally included the mRNA of *pigl* as a negative control, as this mRNA  
254 neither appeared enriched in the GST-FERRY pulldown assay, nor was significantly changed  
255 in the transcriptome analysis of FERRY KO cell lines (see below). While *mrpl41*, *mdh2* and  
256 *atp5f1b* exhibited a clear interaction with the FERRY complex, the interaction with the other  
257 five candidates was much weaker (Figure 3D, Figure S3A). These results suggest that the  
258 FERRY complex binds transcripts with different efficacy *in vitro*.

259 To further establish to which classes of RNAs the FERRY complex preferable binds, we tested  
260 its ability to interact with small RNAs (< 200 nts) in general and different tRNAs  
261 (tRNA<sup>Arg(ACG)</sup>, tRNA<sup>Cys(GCA)</sup> and tRNA<sup>Phe(GAA)</sup>) more specifically using EMSA assays. Even  
262 at equimolar FERRY-to-RNA ratios, we were not able to detect any interaction, indicating a  
263 certain preference of FERRY for mRNAs (Figure S3B-D).

264 Although we selected relatively short mRNA candidates for our *in vitro* assays, these RNAs  
265 still have considerable lengths, ranging from 600 to 2200 nucleotides. This raises the question  
266 regarding the region on the RNA to which the FERRY complex binds. We therefore chose four  
267 mRNAs (*mrpl41*, *mdh2*, *atp5b* and *uchl1*) showing clear binding to the FERRY complex and  
268 divided them into different parts (Figure 3E). The mRNA of Mrpl41 was split into three parts,  
269 the 5'-UTR, the orf and the 3'-UTR with an addition of 50 adenine nucleotides. While the two  
270 UTR fragments did not show any interaction with the FERRY complex, the orf fragment was  
271 still able to bind FERRY. However, the interaction was weaker than observed with full length  
272 *mrpl41* mRNA (Figure 3F, Figure S3E). The other three candidates were each split into two  
273 parts, the 5'-UTR + orf and the 3'-UTR with 50 adenines. The *mdh2*-FERRY and *atp5b*-  
274 FERRY interactions were clearly mediated by the 5'-UTR + orf fragments, while the 3'-UTR  
275 + 50A fragments did not bind the FERRY complex (Figures 3GH, Figures S3FG).  
276 Interestingly, for *uchl1* mRNA, both parts still interacted with the FERRY complex, albeit  
277 showing reduced binding (Figure 3I, Figure S3H). Altogether, these results imply that the  
278 FERRY complex does not bind to a single, short motif on the mRNAs. This conclusion is  
279 supported by the structural analysis of FERRY bound to mRNA, which showed a large and  
280 complex interface involving different subunits of the FERRY complex (Quentin et al., 2021).  
281 Such an extended binding interface clearly distinguishes the FERRY complex from other RBPs  
282 connected to mRNA transport, such as ZBP1, FMRP, Staufen2 or the proteins of the elavl  
283 family, that bind to distinct, mostly AU-rich motifs, in the 3'-UTR (Schieweck et al., 2020).

284

## 285 **The FERRY complex impacts mRNA localization in HeLa cells**

286 To investigate the cellular role of the FERRY-mRNA interactions, we designed an experiment  
287 to compare the localization of EEs (marked by EEA1) and different mRNAs, including a probe  
288 against *polyA* that reflects the general mRNA distribution (Figure 4A). In *wildtype* (*wt*) cells,  
289 we quantified a 13.3% co-localization between *polyA*, mRNA and EEA1-positive EEs (Figure  
290 4B, C).

291 To ensure that the FERRY-mRNA colocalization to EE is specific, we visualized the FERRY  
292 complex, the EE and the mRNA concomitantly by multicolor super resolution microscopy.  
293 With multiple signal classification (MUSICAL) we were able to acquire up to four different  
294 components and reached a resolution of 60 for mRNA and 100 nm for endosomal markers (see  
295 also Methods). Firstly, we combined Fy-2, EEA1 (EE marker) and mRNA (*polyA*), and  
296 observed co-localization as well as partial co-localization with the fluorescence signals in very  
297 close proximity (< 200 nm) (Figure 4D). The enhanced resolution allows resolving the  
298 fluorescent signals and we could detect instances where Fy-2 appears to bridge EEA1 and the  
299 mRNA (Figure 4D, box). Given the sizes of EEA1 in the extended conformation (>200 nm),  
300 of Fy-2 and mRNA (Figure S4A), one cannot expect a precise colocalization of signals on the  
301 image. The observed distances are within the expected range of a FERRY-mediated attachment  
302 of mRNA to the EE (Figure S4A). Secondly, we used both available FERRY markers (Fy-2



303 and Fy-4) with Rabankyrin-5 (EE marker) and mRNA (*polyA*). Often mRNA, FERRY and EE  
304 partially co-localized within a range of 250 nm and we observed events where FERRY and the  
305 EE co-localize while the signal for the mRNA is slightly shifted (Figure 4E). Again, we  
306 detected events where both FERRY markers are located between EE and mRNA (Figure 4E,  
307 box). These data validate the colocalization of FERRY-RNA interaction by confocal  
308 microscopy (Figure 4A-C) and corroborate the notion that the FERRY complex connects the  
309 EE with mRNA.

310 Having established the specificity of the co-localization of *polyA* mRNA and FERRY to EE,  
311 we examined the localization of a set of mRNAs to EE and the consequence of removal of  
312 different FERRY subunits. The candidate set was chosen to include mRNAs that showed  
313 binding to the FERRY complex *in vitro* (i.e. *mdh2*, *mrpl41* and *atp5f1b*), mRNAs that were  
314 identified in our RNA association screen but did not interact with FERRY *in vitro* (*cox8a*,  
315 *cox6b* and *gstp1*), and mRNAs that were inconspicuous in both experiments (*mrps35*, *rims1*,  
316 *psma1* and *gla*). To obtain reliable statistics for mRNAs that are only a small fraction of *polyA*  
317 mRNA, we used automated confocal microscopy to obtain a large sample set. We acquired  
318 images visualizing EEA1 and mRNA in *wt* and FERRY component KO HeLa cell lines. From  
319 13.3% co-localization in *wt* cells, the EE mRNA co-localization decreased upon KO of each  
320 of the four FERRY subunit KOs tested to a varying degree (Figure 4C, left). The KO of *fy-1*  
321 had the strongest effect and reduced the frequency of mRNA-EE co-localization by 44%. In  
322 the *fy-2*, *fy-4* and *fy-5* KO cell lines, we also observed a reduction of EE mRNA co-localization  
323 by 30%, 22% and 15%, respectively (Figure 4C, right). These results indicate that the FERRY  
324 complex contributes significantly to the recruitment of mRNA on EEs, in addition to other  
325 RBPs (Schieweck et al., 2020).

326 Next, we analyzed the co-localization of individual mRNAs with EEs and observed a range of  
327 14.4% to 22.7% co-localization in the *wt* cell line (Figure S4B). Again, we detected a decrease  
328 in co-localization upon FERRY subunit KO for certain mRNAs. For example, the co-  
329 localization of *mdh2* mRNA with EEs decreased from 20% in *wt*, to 12-14% in the KO cell  
330 lines, with the most pronounced effect in the *fy-1* and *fy-2* KO cell lines (Figure 4F, G). In  
331 general, the loss of one of the large subunits Fy-1 or Fy-2 had a stronger impact on mRNA  
332 localization, with several mRNAs (i.e. *mrpl41*, *cox6b*, *gla* and *rims1*) showing a significant  
333 decrease in EE localization upon loss of *fy-1* or *fy-2*. Endosomal localization of *atp5f1b* was  
334 affected in all four KO cell lines, however, more pronounced upon *fy-4* or *fy-5* KO (Figure 4H).  
335 Also, EE localization of *cox8a*, *mrps35* and *psma1* appeared decreased in the *fy-1* and *fy-2* KO  
336 cell lines (Figure 4H). In summary, the KOs of various components of the FERRY complex  
337 impacts the recruitment of mRNAs to EEs. Furthermore, the loss of the FERRY complex only  
338 affects the co-localization of certain mRNAs with EEs, while others are only moderately  
339 affected or unaltered. KO of *fy-1* or *fy-2* had a stronger impact on early endosomal mRNA  
340 recruitment than the KO of *fy-4* or *fy-5*, which is also reflected by the clinical data that report  
341 severe symptoms for mutations in *fy-1* or *fy-2*. These data suggest that the FERRY complex

342 plays a major role in mRNA recruitment to EEs and most probably mRNA transport. The  
343 observation that some mRNAs are more affected than others underlines the notion that the  
344 FERRY complex exhibits a preference for certain mRNAs.

345

### 346 **The loss of FERRY impacts the cellular transcriptome and proteome**

347 We hypothesized that mis-localization of mRNAs might have an influence on mRNA levels  
348 and, possibly, protein expression. To test our hypothesis, we analyzed the transcriptome of the  
349 different FERRY component KO cell lines. Data analysis revealed transcriptomic changes in  
350 all four KO cell lines (Figure 5A, Figure S5A). Interestingly, we observed a more pronounced  
351 up-regulation of genes in the *fy-1* KO cells, while loss of *fy-2* mainly caused down-regulation  
352 of mRNA levels (Figure 5A). Such a bias towards either up- or downregulation was not  
353 observed upon KO of *fy-4* or *fy-5* (Figure S5A). In order to analyze the datasets further, the  
354 respective mRNAs were subdivided into different groups, according to their occurrence in the  
355 different KO cell lines and the direction of regulation (Figure S5B, C). Subsequently, these  
356 groups were probed for an enrichment of gene ontology (GO) terms, kegg or reactome  
357 pathways. Firstly, we were interested in a common phenotype of the FERRY complex and  
358 focused on the groups of mRNAs that were affected by the KO of all four FERRY subunits.  
359 Among the downregulated mRNAs the most prominent group was nucleosomal mRNAs.  
360 Components of the mitotic spindle and cell junction proteins were found to be upregulated.  
361 Further subdivision of the transcriptomic changes allowed us to assess FERRY component-  
362 specific phenotypes. Among the mRNAs downregulated in the *fy-2* and *fy-4* KO cell lines,  
363 mRNAs of ribosomal proteins and nuclear-encoded mRNAs for mitochondrial protein  
364 complexes were enriched. Also, the loss of *Fy-2* alone decreased the abundance of the  
365 transcripts connected to the ribosome. These data indicate that the loss of FERRY components  
366 has a broad influence on the cellular transcriptome, affecting different pathways and cellular  
367 processes. The differential effect of the KO of the different subunits of the complex might also  
368 reflect additional roles of these components beyond their role in the complex itself. The  
369 downregulation of nuclear-encoded mRNAs of mitochondrial proteins and components of the  
370 translation machinery in the *fy-2* and *fy-4* KO cell lines, support the association of such mRNAs  
371 with the FERRY complex.

372 These finding directly raise the question whether the observed alterations in mRNA levels also  
373 translate into changes in protein levels. Therefore, we assessed the levels of proteins translated  
374 from mRNAs that are strongly affected by loss of FERRY components (Figure 5B). Western  
375 blot analysis showed that changes in mRNA levels can be reflected by strong changes in protein  
376 levels, and even manifest in loss of certain proteins, as observed for *Tns1* and *Phka1* in the *fy-*  
377 *2* KO and *Ak4* and *Alcam* in the *fy-4* KO cell line (Figure 5C). However, not all changes  
378 observed on the transcriptome level were mirrored by changes of protein levels, which can be  
379 explained by the wide range of cellular mechanisms that regulate protein levels.

380 In summary, the FERRY complex not only influences mRNA localization, but also affects the  
381 abundance of certain mRNAs which also impacts the respective protein levels. Some of the  
382 changes might be a direct consequence of aberrant localization, such as the downregulation of  
383 mRNAs for mitochondrial proteins in *fy-2* and *fy-4* KO cell lines. Other effects such as the  
384 upregulation of cell junction mRNAs might constitute secondary or compensatory effects of  
385 the KO. While aberrant localization of mRNAs in HeLa cells might be compensated by  
386 diffusion, such changes likely become detrimental in neurons given their elongated  
387 morphology.

388

### 389 **The FERRY complex localizes to axons as well as to the somatodendritic region**

390 Mutations in FERRY subunits have a major impact on brain development and function.  
391 Therefore, we assessed the localization of the FERRY complex in primary rat hippocampal  
392 neurons. To determine its distribution, we compared the FERRY localization with respect to  
393 EEA1 and Rabankyrin-5. EEA1 and Rabankyrin-5 differ in their localization in neurons, as  
394 EEA1 is restricted to the somatodendritic region (Wilson et al., 2000), while Rabankyrin-5 is  
395 also found in axons (Goto-Silva et al., 2019). Again, we observed a punctate pattern of  
396 fluorescent foci dispersed across the neuron for Fy-2 (Figure 6A, overview) and the fluorescent  
397 signal strongly co-localized with the endosomal markers EEA1 and Rabankyrin-5. We  
398 observed many triple positive (Fy-2, EEA1, Rabankyrin-5) endosomes (Figure 6A, details,  
399 white arrowheads), but also fluorescent foci that were only positive for Fy-2 and Rabankyrin-  
400 5, mainly in thin structures devoid of EEA1 (Figure 6A, blue, yellow arrowheads). These  
401 results suggest that the FERRY complex is present in both somatodendritic region and axons.

402 In order to validate this hypothesis, we performed immunofluorescence against Map2 and the  
403 phosphorylated neurofilament-1 (pNF) as markers of the somatodendritic region and axons,  
404 respectively (Figure 6B, overview). As our previous experiments suggested, we observed Fy-  
405 2 and Rabankyrin-5 positive EEs in thin structures positive for the axonal marker pNF (Figure  
406 6B, box). In summary, the FERRY complex resides on EEs distributed across the neuronal  
407 soma, dendrites and axons, raising the question about possible mRNA localization on these  
408 endosomes.

409

### 410 **The FERRY complex co-localizes with mRNA on EEs in neurons**

411 To investigate whether FERRY-positive EEs also carry mRNA in neurons, we visualized the  
412 total pool of mRNAs using a *polyA* probe and focused on imaging dendrites and axons, as the  
413 cell body has a high protein and mRNA density. While the mRNA density in major dendrites  
414 is still high, it decreases in thinner processes and forms clusters at nodes. Overall, we observed  
415 that 6.1% of mRNA foci co-localize with the FERRY complex (Figure 6C). Often, these  
416 structures also co-localize with EEA1, suggesting that mRNAs are located on EEs (Figure 6C,  
417 light blue box). In other cases, a larger endosome is surrounded by several mRNA foci, with

418 the fluorescent signals in close proximity rather than co-localizing (Figure 6C, white box).  
419 Deconvolution allowed us to attain a resolution of ~150 nm in the XY-plane. However, z-  
420 resolution of confocal microscope is >500nm. This means that, under normal confocal  
421 conditions, fluorescent signals in close proximity to each other would be partially co-localized  
422 and within a distance of 250 nm, which is the expected range of a FERRY-mediated attachment  
423 of mRNA to the EE, taking into account the antibody labelling and the fluorescent *in situ*  
424 hybridization (FISH) (Figure S4B). In case of dense fluorescent signals, similar to those of  
425 *polyA*, a substantial proportion of apparent colocalization might result from random co-  
426 localization. Therefore, we estimated the random co-localization (Kalaidzidis et al., 2015)  
427 (Figure S6A, left). The results of the analysis indicate that the co-localization of Fy-2 and  
428 mRNA is significantly higher than random, indicating the attachment of mRNAs to the EE  
429 (Figure S6A, right).

430 We next tested the co-localization of the FERRY complex with specific transcripts in neurons  
431 choosing the *mdh2* and *uchl1* mRNAs based on the initial mRNA-binding screen (Figure 2E)  
432 and the co-localization experiments in HeLa cells (Figure 4E). Visualizing individual mRNAs,  
433 we obtained much less fluorescent signal per cell (Figure 6D, E). However, we still observed  
434 fluorescent signals partially overlapping or in close proximity below 250 nm (Figure 6D, E  
435 boxes). Quantifying the number of events, we found 13.2% of *mdh2* transcripts and 10.3% of  
436 *uchl1* mRNAs in close proximity or partially overlapping with the FERRY complex.

437

### 438 **mRNA-loaded FERRY-positive endosomes colocalize with mitochondria**

439 The interaction between the FERRY complex and different transcripts encoding mitochondrial  
440 proteins suggests that FERRY-positive EEs loaded with mRNAs might be observed in the  
441 proximity to, or on, mitochondria for localized translation. To examine this, we additionally  
442 stained neurons with TOM70 as a marker for mitochondria. When visualizing the *polyA* mRNA  
443 population, we regularly found co-localization of the FERRY complex with mRNA on  
444 mitochondria (Figure 7A). We also assessed the co-localization of the FERRY complex with  
445 the *mdh2* mRNA and mitochondria (Figure 7B). Even though these events were infrequent, we  
446 observed examples where the fluorescence signal of the FERRY complex, the *mdh2* mRNA  
447 and mitochondria were in close proximity (Figure 7B, blue box) or even co-localizing (Figure  
448 7B, grey box). Despite the abundance of mitochondria, the degree of co-localization of  
449 mRNAs, FERRY and mitochondria are above the expected value for random co-localization,  
450 indicating the detection of biologically meaningful events (Figure S6B). These findings support  
451 the notion that the FERRY complex is involved in the localization and the distribution of  
452 specific mRNAs, such as transcripts encoding mitochondrial proteins (e. g. *mdh2* mRNA),  
453 most probably by mediating their endosomal transport (Figure 7C).

454

## 455 **Discussion**

### 456 **A novel link between the endosomal system and the translation machinery**

457 In this study, we identified and characterized a novel Rab5 effector complex, named FERRY,  
458 composed of five subunits, Fy-1 to Fy-5, which interacts with activated Rab5 and is  
459 predominantly located on EEs. Furthermore, FERRY directly interacts with mRNAs and in  
460 cells, is able to recruit mRNAs onto EEs, enabling the cell to exploit the full logistic capacity  
461 of the endosomal system to organize mRNA transport and distribution (Figure 7C). Unlike  
462 endocytosed cargo molecules that are inside the endosomal lumen, the RNA is bound and  
463 transported on the outside. The FERRY complex therefore couples two vital cellular functions,  
464 gene expression and vesicular transport.

### 465 **FERRY is a novel type of RNA-binding protein complex**

466 Although the FERRY complex does not contain known RNA-binding motifs, it directly  
467 interacts with mRNAs *in vitro* and in cells. Structural studies identified the main mRNA-  
468 binding interface as a coiled-coil region at the N-terminus of Fy-2 with additional involvement  
469 of several other FERRY components (Quentin et al., 2021). These data indicate that the  
470 FERRY complex may also define a novel class of RBPs. The FERRY-RNA interaction is  
471 characterized by a large and complex interface on the protein but also on the RNA side.  
472 Furthermore, coiled-coil regions have not yet been identified as RNA-binding motifs and thus  
473 offer the possibility for further discoveries. Despite the large RNA-binding interface on the  
474 FERRY complex, we only detected moderate binding affinities to RNAs *in vitro*. These  
475 findings point towards additional layers of regulation in the FERRY-RNA interaction *in vivo*,  
476 which could be post-translational modifications, e.g. phosphorylation, structural or  
477 conformational features of the FERRY complex, or the mRNAs that might be provided by yet  
478 unknown factors. Our attempts to subdivide RNAs often led to decreased binding of the  
479 individual fragments. This further indicates a similarly complex interface on the RNA that may  
480 be composed of multiple distinct motifs distributed along the length of the RNA. Rather than  
481 showing a preference for single- or double-stranded mRNA, the FERRY complex might  
482 interact with distinct structural elements of certain RNA folds. Taken together, the FERRY  
483 complex exhibits novel RNA-binding features, and provides a new model system to obtain  
484 deeper insights in RNA-protein interactions in future studies.

### 485 **mRNA transport on endosomes**

486 Recent studies have highlighted the vital role of different endosomal compartments for mRNA  
487 transport and localization (Cioni et al., 2019; Liao et al., 2019; Popovic et al., 2020). The  
488 coupling between the endosomal system and the translation machinery raises the question as  
489 to which transcripts bind to endosomes, how many mRNA binding sites can endosomes offer  
490 and whether these are provided by different RBPs. The observation of several, up to four  
491 mRNA foci, on a single endosome (Figure 5C) suggests that endosomes may be able to

492 accommodate multiple mRNAs. However, it does not answer the question whether these  
493 originate from the same RBP or from different mRNA attachment systems. The presence of  
494 multiple different physical contacts between endosomes and mRNA is supported by a recent  
495 study, showing that transcripts can interact with EEs in a translation-dependent or -independent  
496 fashion, pointing towards different mechanisms (Popovic et al., 2020). However, the molecular  
497 mechanisms of these binding modes remain to be elucidated.

## 498 **Connection between mRNA localization and neurodegeneration**

499 Genetic disruption of the FERRY complex causes severe neurological defects in human  
500 patients, especially when Fy-1 and Fy-2 are affected. Most cases report a biallelic frame shift  
501 mutation in *fy-1* or *fy-2*, which causes a C-terminal truncation of the respective protein at  
502 specific positions. These truncations of either of the two large FERRY subunits has severe  
503 impact on the FERRY complex on a molecular level. Already a C-terminal truncation of the  
504 last 84 amino acids of Fy-2 leads to intellectual disability and brain abnormalities (Suleiman  
505 et al., 2018). On a molecular level, this truncation is sufficient to prevent the interactions  
506 between Fy-2 and Fy-1/Fy-3 as well as those with Rab5, hence disrupting the structural  
507 integrity of the complex and impairing its proper sub-cellular localization (Quentin et al.,  
508 2021). The clinically relevant C-terminal truncations of Fy-1 often affect different domains of  
509 the protein including the TBC domain, which is the most conserved part of Fy-1. Additionally,  
510 the loss of the TBC Rab GTPase activating domain, might have severe consequences for  
511 endocytic trafficking. In summary, the reported mutations have a strong impact on the integrity  
512 of the FERRY complex on a molecular level and are therefore likely to induce substantial mis-  
513 localization of mRNAs. Our findings confirm that the localization of a large variety of  
514 transcripts is affected in FERRY subunit defective cells, making it difficult to identify the  
515 cellular pathways that lead to the reported symptoms upon disruption. Further studies are  
516 needed to disentangle the mechanisms by which mRNA mis-localization leads to systemic  
517 brain damage.

## 518 **Limitations of the Study**

519 Our experiments show that the FERRY complex directly interacts with mRNA *in vitro* and in  
520 cells. However, the observed moderate binding efficacies *in vitro* seem to contradict the  
521 extensive mRNA binding interface on the FERRY complex. This interface comprises the N-  
522 terminal coiled-coil of Fy-2 as main contact site and several other contacts with the C-terminus  
523 of Fy-2, with Fy-1, Fy-3 and Fy-5 (Quentin et al., 2021). The first limitation lies in the  
524 determination of reliable *in vitro* binding constants which is hindered by the structural  
525 complexity of a five-subunit complex and mRNA, structural heterogeneity including  
526 conformations that are unable to engage in the interaction.

527 A possible explanation for the weak *in vitro* affinities would be additional factors that interact  
528 with FERRY and RNA, *e.g.* RBPs. The GST-FERRY interactor screen did not yield a potential  
529 interactor which might be able to fulfil this function. However, we acknowledge that other

530 cellular mechanisms may support the FERRY-RNA interaction *in vivo*. Such mechanisms  
531 might involve the transient interaction with proteins that act as loading or unloading platforms  
532 for mRNA onto FERRY *e.g.* by modifying the conformation of either FERRY or the mRNA.  
533 It is also conceivable that post-translational modifications of FERRY, *e.g.* phosphorylation,  
534 modifications of the mRNA, *e.g.* methylation, interaction of the FERRY complex with  
535 endosomal lipids or yet unknown mechanisms might be involved in regulating such interaction.  
536 Given the number of different mRNAs that are produced in the cell, an intricate regulation of  
537 mRNA binding seems more likely than a purely affinity driven FERRY-mRNA interaction.

538 We also observed that the FERRY complex seems to show different binding efficacies for  
539 different mRNAs *in vitro*, which suggests that the FERRY complex is able to provide mRNA  
540 specificity (Quentin et al., 2021). However, these observations are limited to *in vitro*  
541 experiments and further mechanisms (see above) might contribute to mRNA specificity or  
542 mRNA recognition in the cell.

543 Overall, this study provides a novel molecular player that, due to its evolutionary conservation  
544 and requirement for organism physiology, plays an important role in the intracellular  
545 localization and translational control of mRNAs exploiting the early endosomes as transport  
546 system. The identification of the FEERY complex raises a number of questions that need to be  
547 addressed in *ad hoc* structure and function studies. Cells where spatial localization of mRNAs  
548 is rate limiting, such as neurons or fungi, are systems of choice to address such questions and  
549 test predictions of FERRY complex function.

550

## 551 **Acknowledgements**

552 Firstly, we thank I. Bartnik for excellent technical support and P. Hackert for support with the  
553 RNA-IP after crosslinking. We also acknowledge S. Raunser and D. Quentin for valuable  
554 feedback regarding the manuscript and the members of the cluster of excellence “Physics of  
555 Life” (Deutsche Forschungsgemeinschaft under Germany’s Excellence Strategy—EXC-2068–  
556 390729961—Cluster of Excellence Physics of Life of Technische Universität Dresden) for  
557 stimulating discussion. Especially, we would like to thank the following Services and Facilities  
558 of the MPI-CBG for their support: The antibody Facility, the light microscopy facility, the  
559 mass spectrometry facility, the genome engineering facility and protein expression and  
560 purification facility. We also thank the DRESDEN-concept Genome Center (DcGC at CMBC  
561 at the TU Dresden) supported by DFG (INST 269/768-1) for technical support. Furthermore,  
562 we would like to thank Refeyn Ltd (Oxford, UK) for the use of their Mass Photometer. We  
563 also thank the Centre for Information Services and High Performance Computing (ZIH) of the  
564 TU Dresden for the generous provision of computing power. This research was financially  
565 supported by the Deutsche Forschungsgemeinschaft (DFG, German Research Foundation) -  
566 Project Number 112927078 - TRR 83 to M.Z., SFB1190 P04 to K.E.B. and SFB1190, P08/14  
567 to M.T.B., and the Max Planck Society. Open access funding was by the Max Planck Society.

568 J.S.S. was funded by the Deutsche Forschungsgemeinschaft (DFG, German Research  
569 Foundation) - Project Number 112927078 - TRR 83.

570

## 571 **Author contributions**

572 Conceptualization, J.S.S. and M.Z.; Software, L.H.; Formal Analysis, J.S.S., C.L., L.H., Y.K.,  
573 A.T.-P. and M.Z.; Investigation, J.S.S., S.t.D., S.C., J.D.G., S.S., R.S., A.G., K.E.B., M.T.B.  
574 and M.Z.; Data Curation, L.H.; Writing – Original Draft, J.S.S. and M.Z.; Writing – Review &  
575 Editing, all authors.; Visualization, J.S.S., C.L. and L.H.; Supervision, J.S.S. and M.Z.; Project  
576 Administration, J.S.S. and M.Z.; Funding Acquisition, E.M.S and M.Z.

577

## 578 **Competing interests:**

579 The authors declare no competing financial interests.

580

## 581 **Data availability:**

582 RNA Sequencing (RNA-Seq) data and the respective scripts for the analysis of the RNA-Seq  
583 and proteomics data are available in a public repository (<https://dx.doi.org/21.11101/0000-0007-EEE3-D>).

585

586



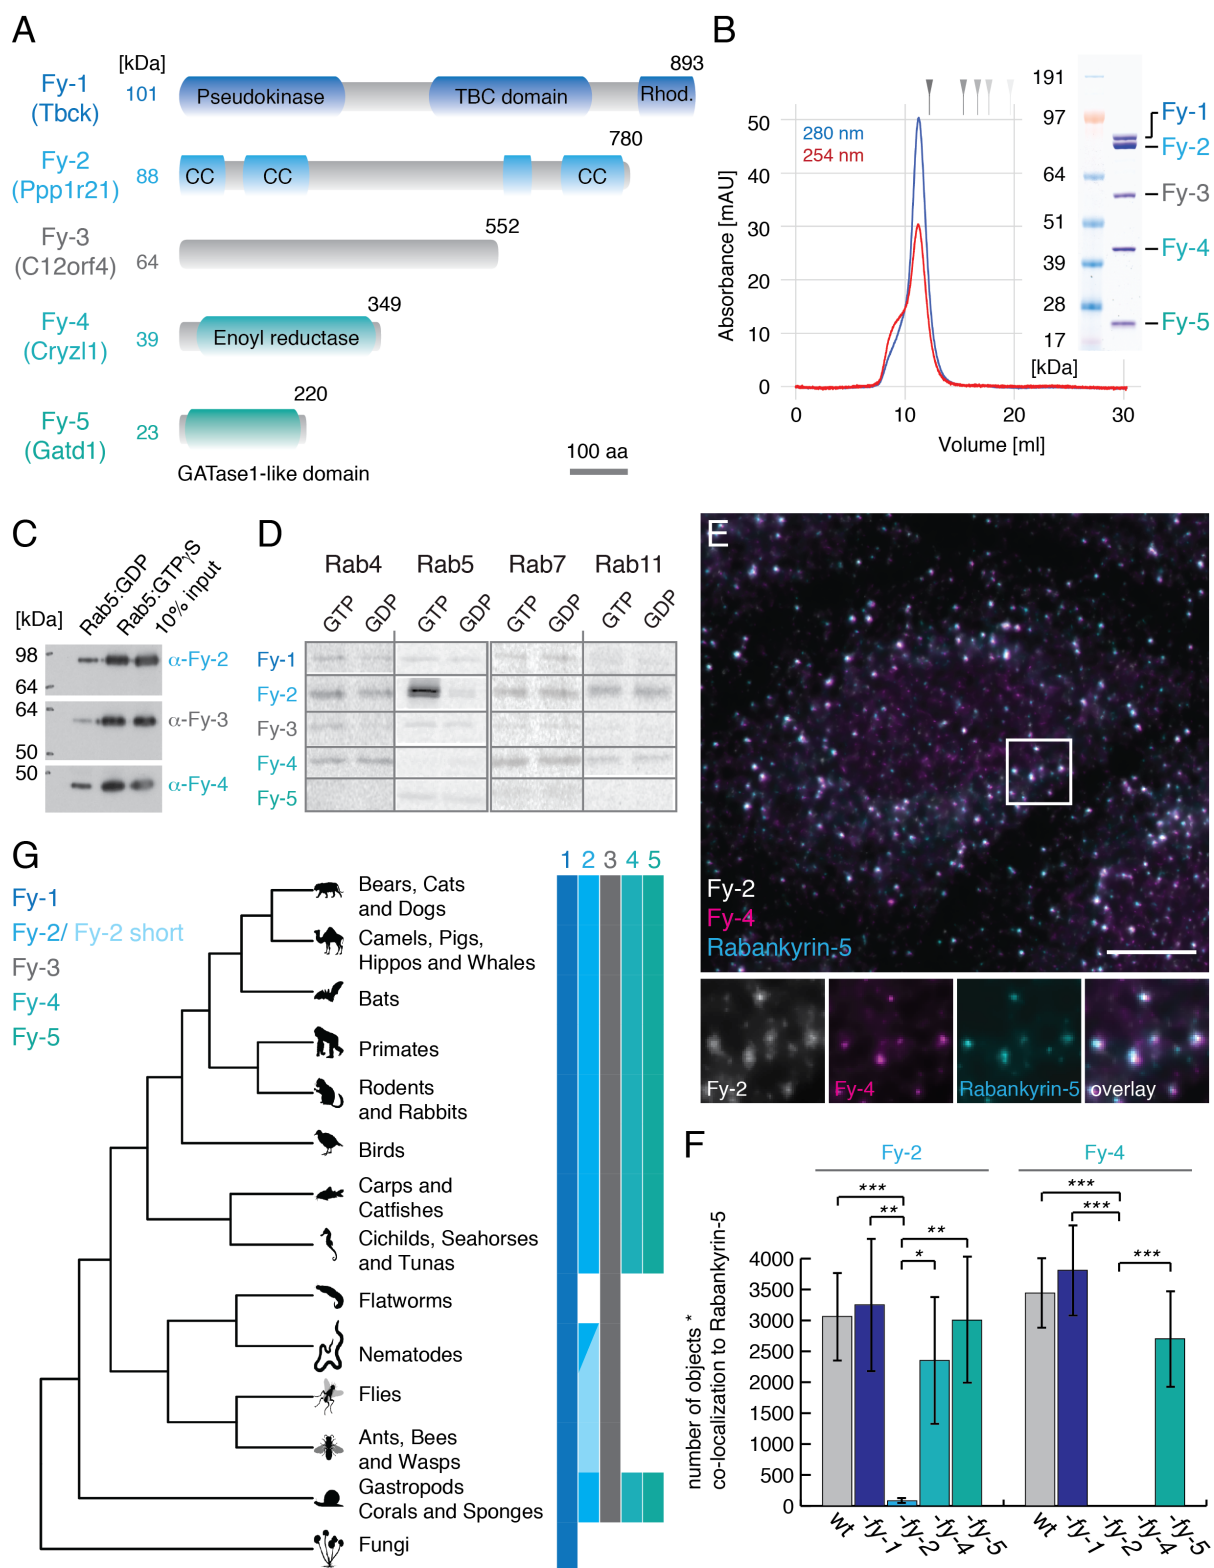

587

**Figure 1: A)** Domain architecture of the components of the FERRY complex drawn to scale (scale bar in left lower corner: 100 amino acids (aa); TBC: Tre-2/Bub2/Cdc16, Rhod.: Rhodanese domain, CC: coiled-coil). **B)** SEC profile of the FERRY complex (blue: 280 nm, red: 254 nm) with a Coomassie-stained SDS PAGE. Molecular weight standard (670, 158, 44, 17, 1.35 kDa). **C)** Western blot analysis of an *in vitro* pulldown assay of the FERRY complex incubated with glutathione beads with GST-Rab5 loaded with GDP or GTP $\gamma$ S using antibodies against Fy-2, Fy-3 and Fy-4. **D)** Fluorographic analysis of GST binding assays using different Rab GTPases against *in vitro* translated  $^{35}$ S methionine-containing FERRY components. **E)** Immunostaining of HeLa cells against

595 Rabankyrin-5, Fy-2 and Fy-4 (Scale bar: 10  $\mu$ m). The boxed region is shown below in more detail. **F)**  
596 Quantification of the fluorescent signal of Fy-2 and Fy-4 in images as in E. **G)** Phylogenetic analysis of the  
597 subunits of the FERRY complex (complete list: [Table S1](#)).

598

## A workflow of the interactor screen

1. GST-FERRY
2. GST-FERRY on resin
3. Incubation with cell components
4. Wash and elution
5. Analysis

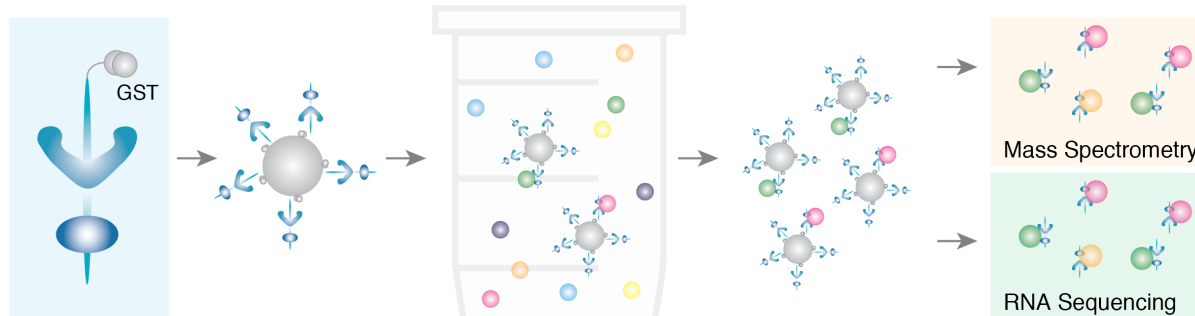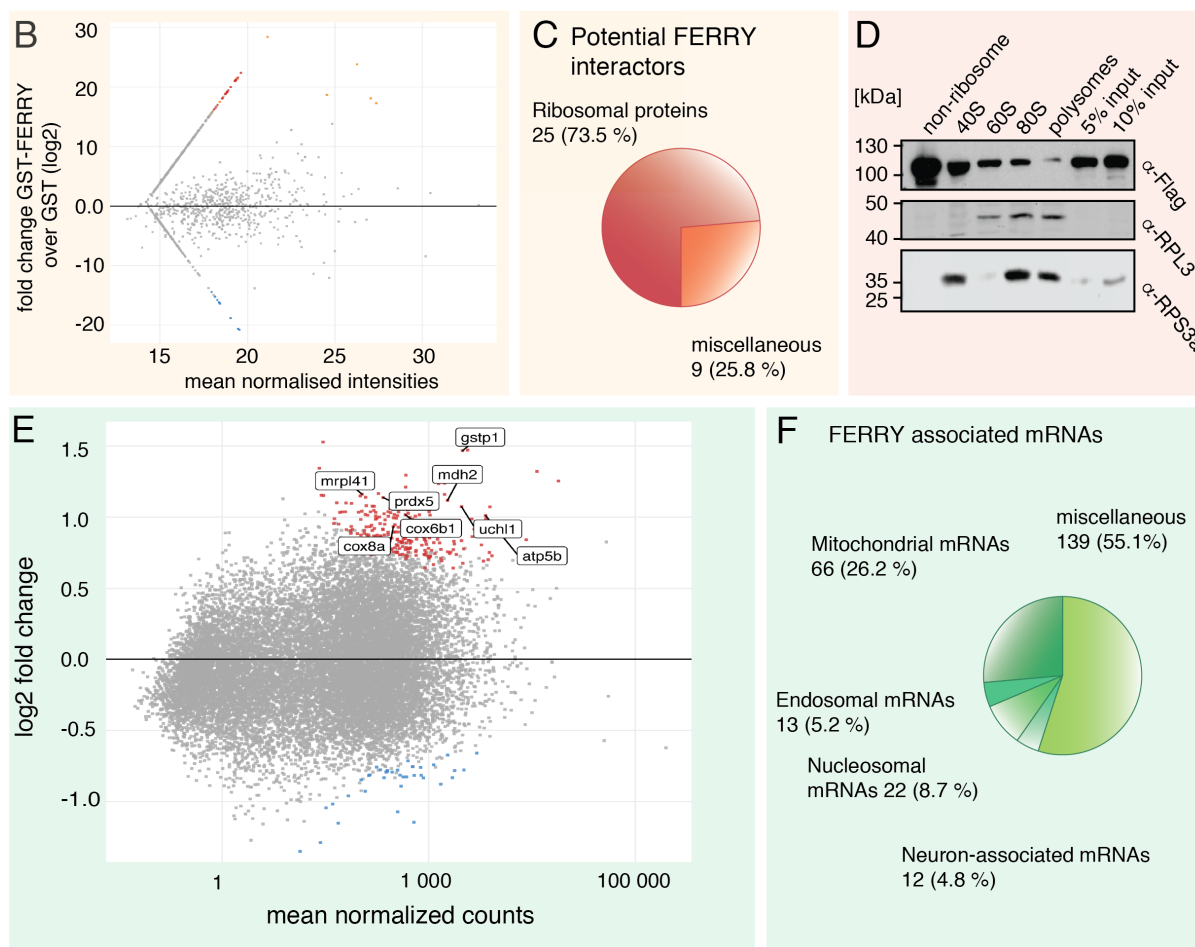

599

600 **Figure 2: A)** Scheme of the *in vitro* GST-FERRY interactor screen. **B)** MA plot of results of the GST-FERRY  
 601 interactor screen. Candidates enriched in GST-FERRY and GST are indicated in red and blue, respectively. **C)**  
 602 Pie chart of potential FERRY interactors **D)** Western blot analysis of sucrose density gradient fractions containing  
 603 ribosomal (40S, 60S, 80S and polysomes) and non-ribosomal complexes **E)** MA plot of the RNA sequencing of  
 604 potential FERRY-associated mRNAs. mRNA candidates associated with GST-FERRY and GST are highlighted  
 605 in red and blue, respectively **F)** Pie chart of the FERRY-associated mRNAs.

606

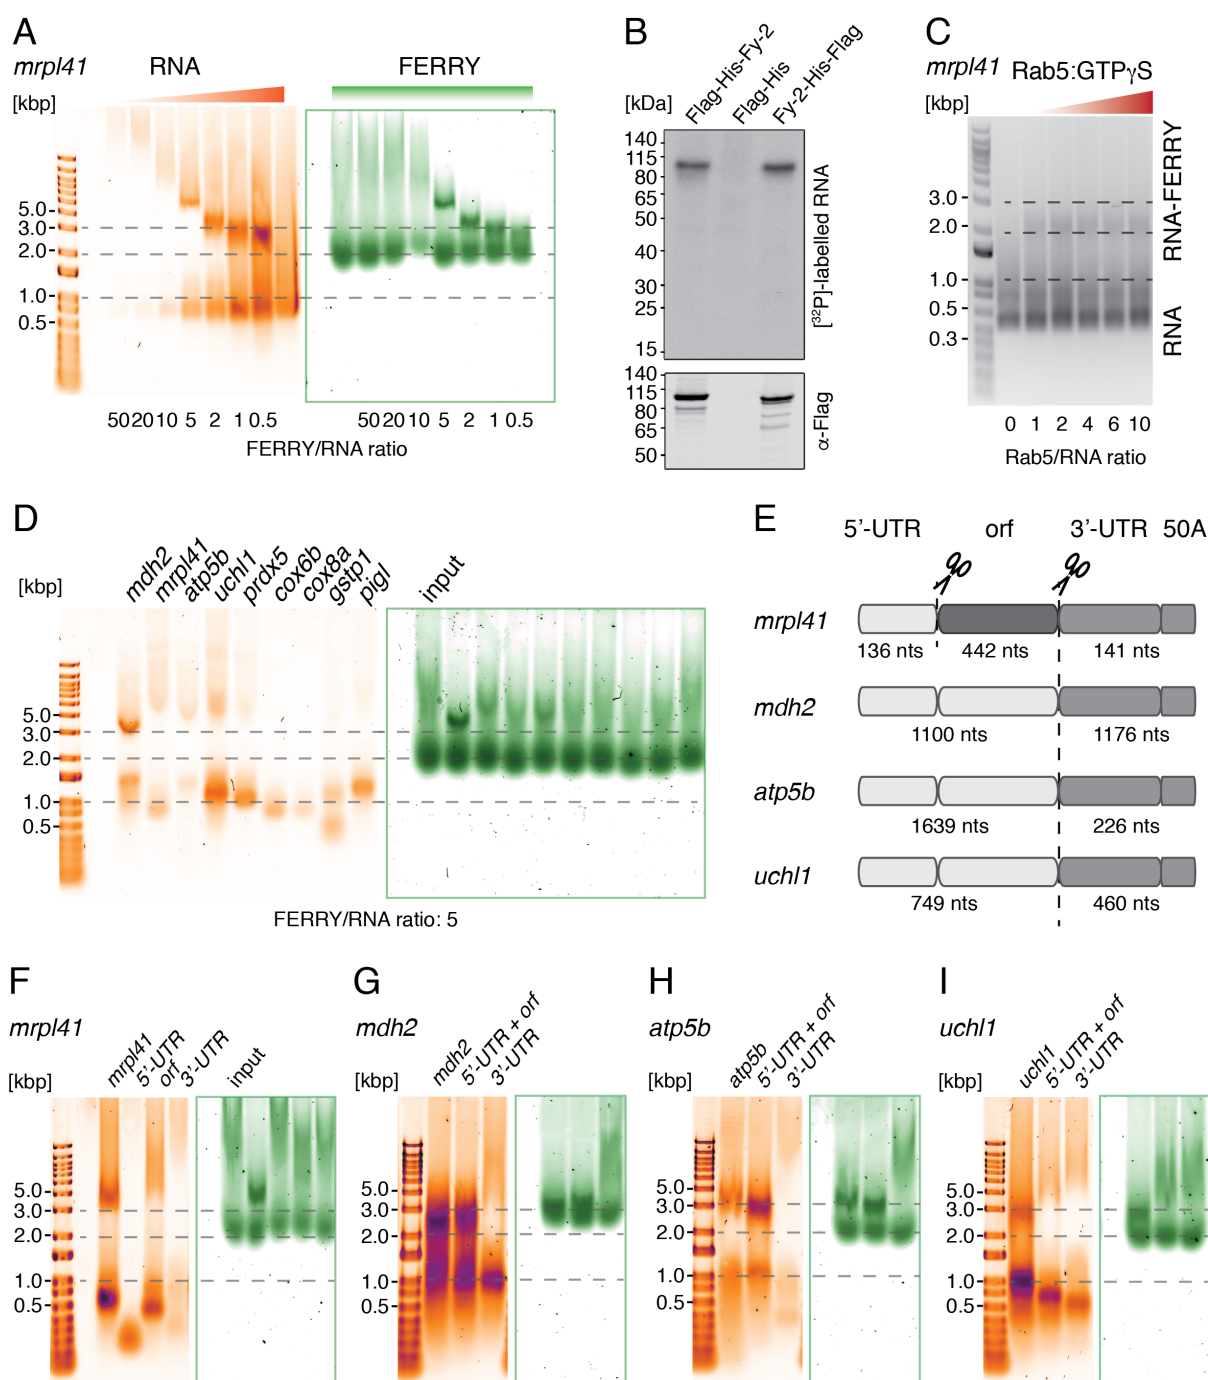

607

608 **Figure 3: A)** Electrophoretic mobility shift assay (EMSA) with increasing ratios of FERRY to RNA. (RNA:  
609 orange, SYBR Gold; proteins: green, Sypro Red) **B)** Detection of radiolabelled RNAs by autoradiography and  
610 Flag-tagged proteins by Western blotting of a tandem affinity purification after UV crosslinking. **C)** EMSA in the  
611 presence of Rab5:GTP<sub>γ</sub>S with a fixed ratio of FERRY to RNA of 3. (RNA: grey, ethidium bromide) **D)** EMSA  
612 with different mRNAs at a fixed FERRY/RNA ratio of 5. **E)** Scheme of RNA sub-constructs. **F) – I)** EMSAs  
613 comparing four different RNAs with their respective subdivision construct shown in E.

614

615

616

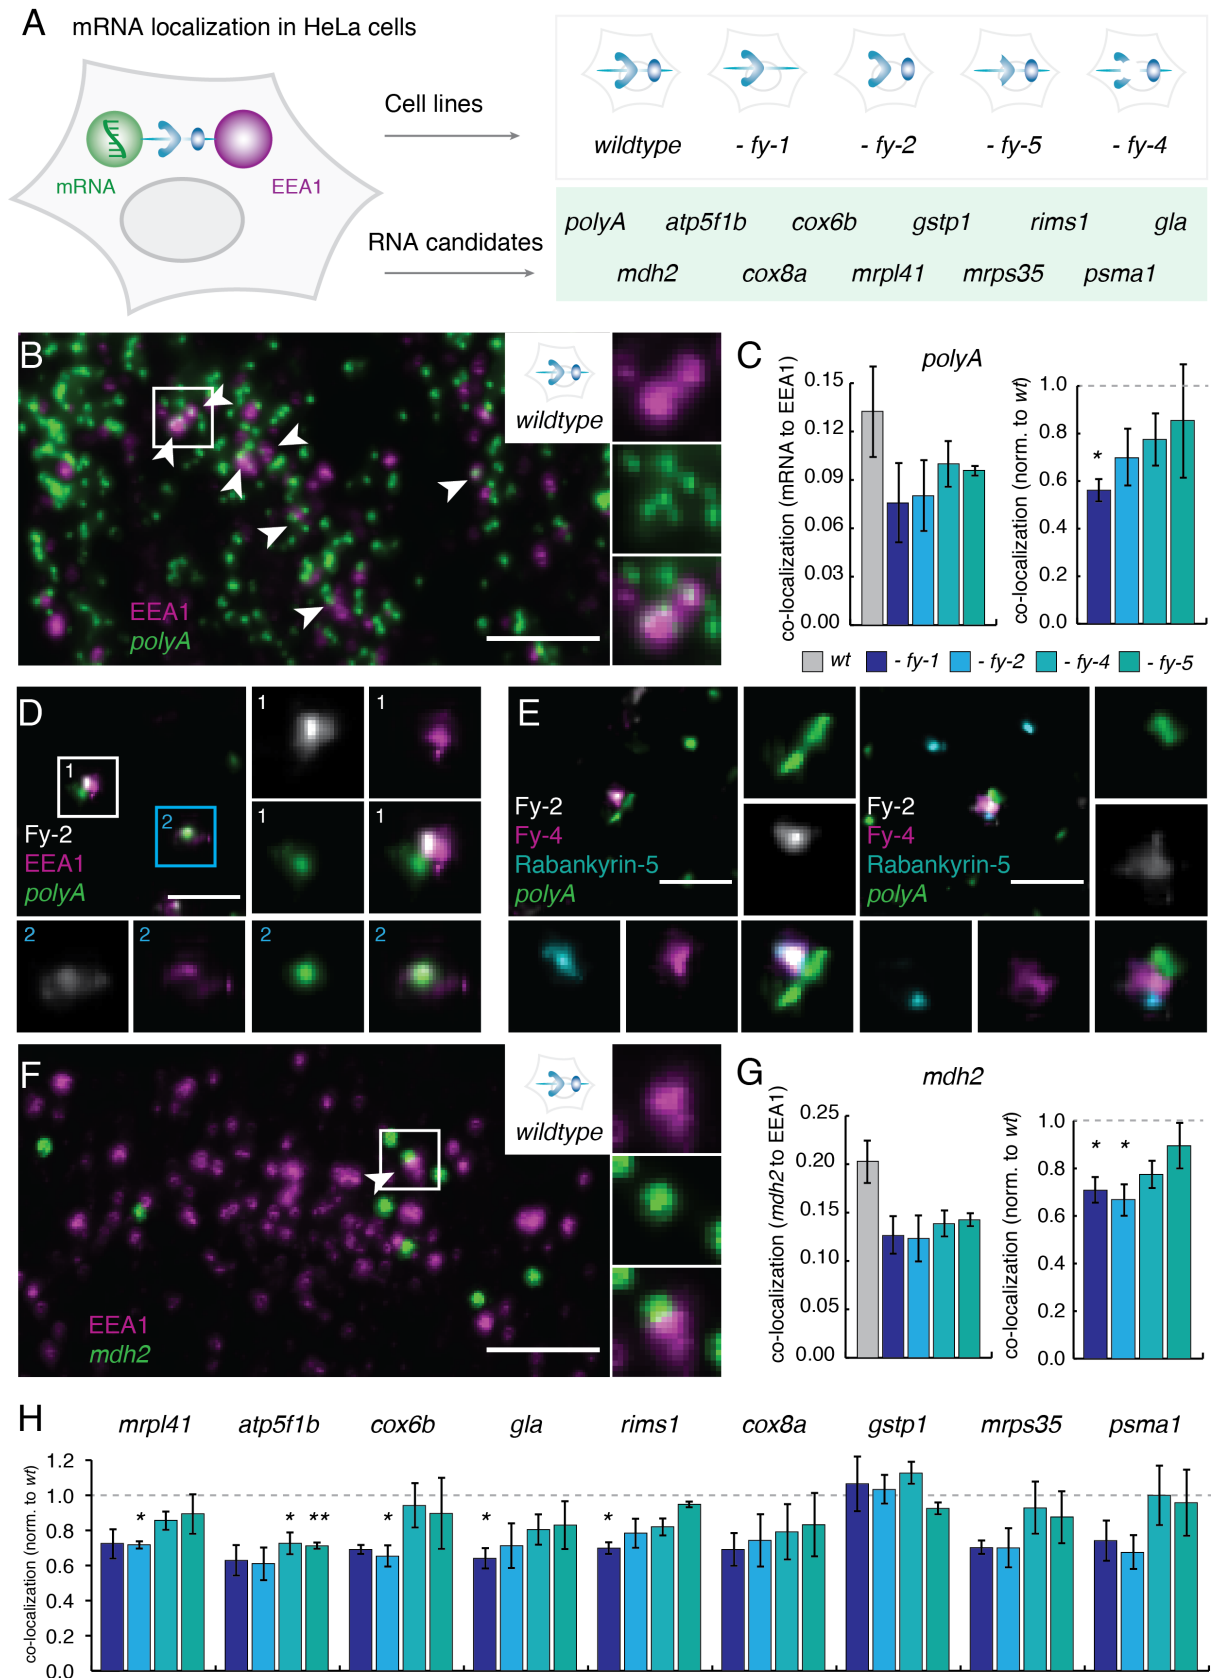

617

618 **Figure 4:** **A)** Scheme of the localization experiment, showing different markers (mRNA: smFISH, EEA1:  
 619 antibody), mRNAs (in the green box) and cell lines (grey box). **B)** Visualization of EEA1 and *polyA* in *wt* HeLa  
 620 cells (Scale bar: 5  $\mu$ m). Co-localization events are indicated with white arrow heads and the boxed region is  
 621 highlighted on the right. **C)** Quantification of co-localization of *polyA* and EEA1 in HeLa *wt* and different KO

622 cell lines. **D)** and **E)** Super-resolution (Musical) imaging with indicated markers (Scale bar: 1  $\mu\text{m}$ ). **F)**  
623 Visualization of EEA1 and *mdh2* mRNA in *wt* HeLa cells (Scale bar: 5  $\mu\text{m}$ ). The Co-localization event is indicated  
624 with an arrow head and the boxed region is highlighted on the right. **G)** Quantification of co-localization of the  
625 *mdh2* mRNA probe and EEA1 in different HeLa cell lines. **H)** Quantification of co-localization of the different  
626 mRNAs and EEA1 in FERRY KO cell lines (Co-localization normalized to *wt*).  
627

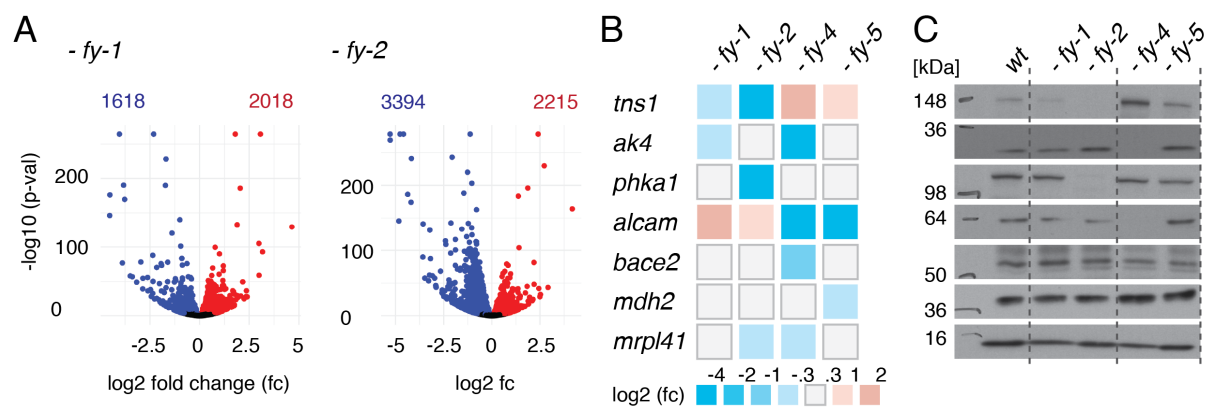

628

629 **Figure 5: A)** Volcano plots of the transcriptomic changes in the *fy-1* and *fy-2* KO cell lines compared to *wt*. (blue:  
 630 down; red: up) **B)** Heatmap of the levels of exemplary mRNAs. **C)** Western blot analysis of the proteins encoded  
 631 by the mRNAs shown in B.

632

633

634

635

636

637

638

639

640

641

642

643

644

645

646

647

648

649

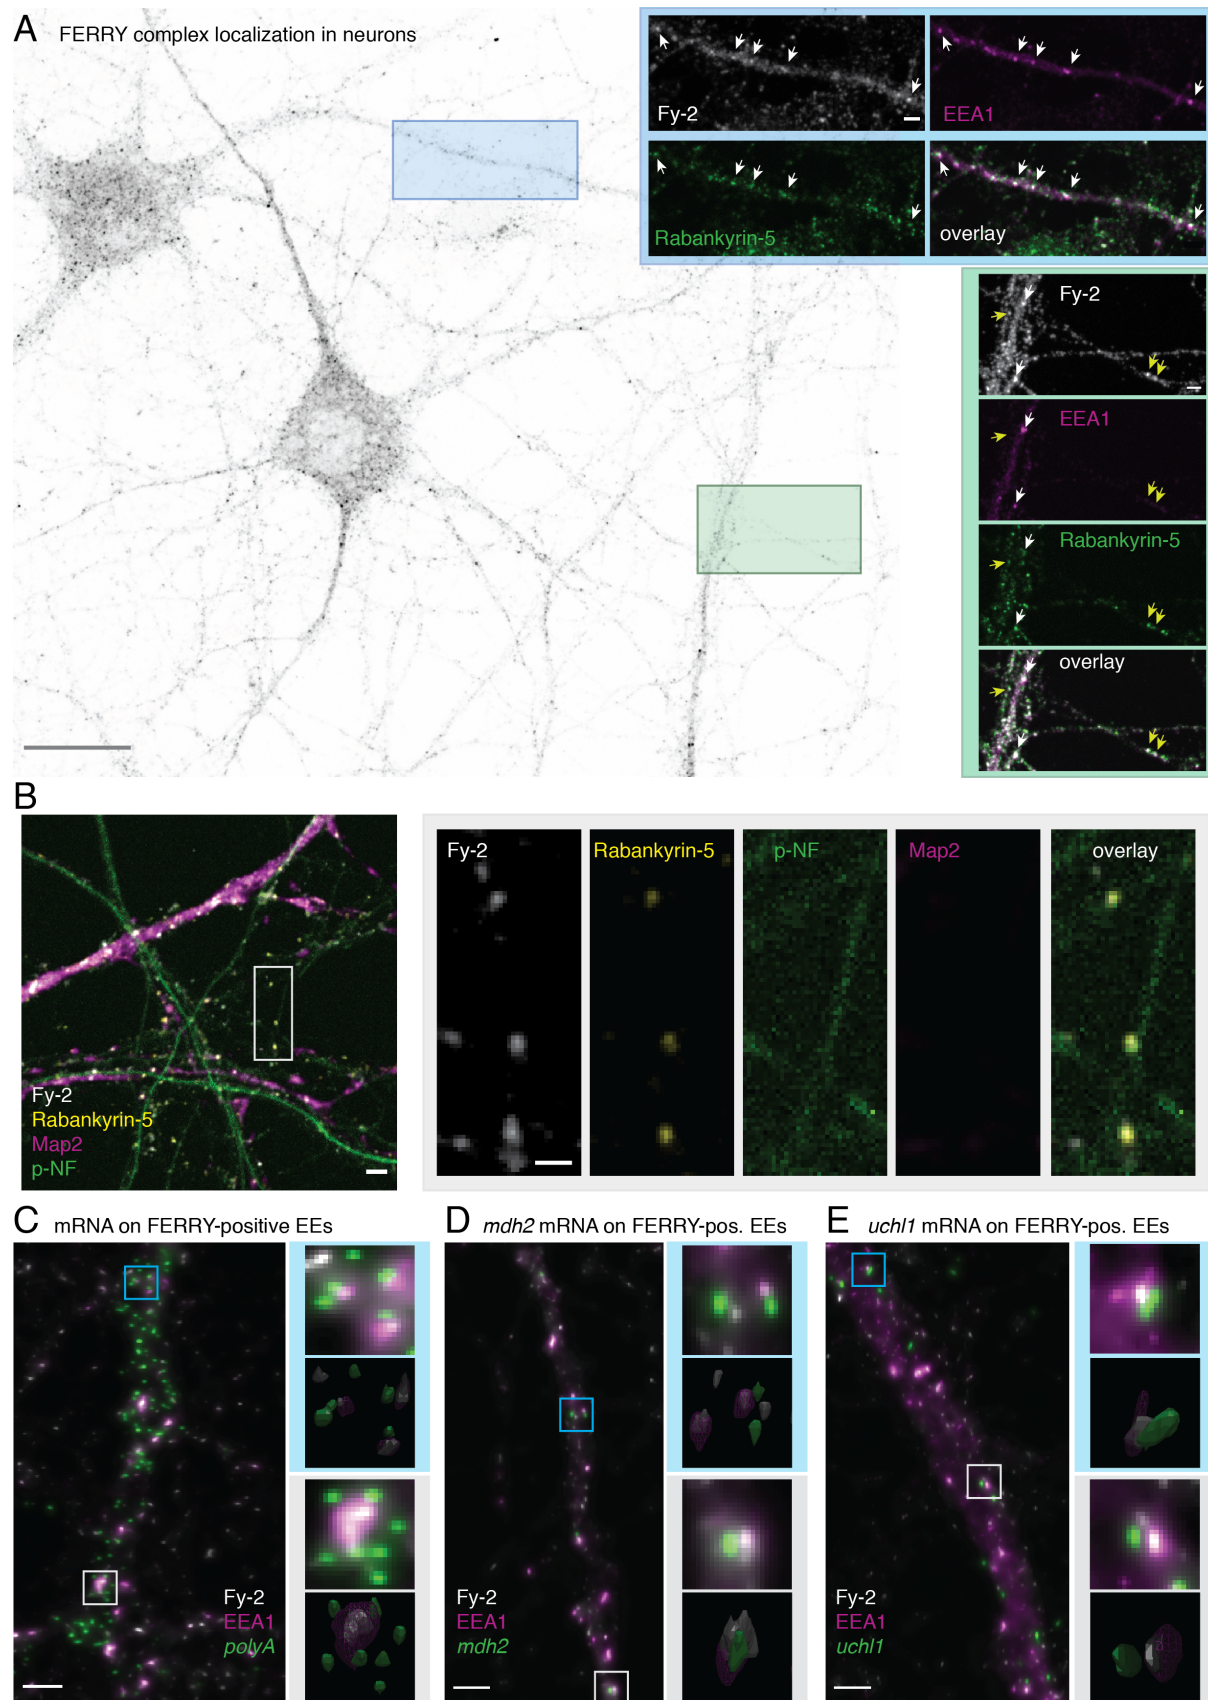

650

651

652

653

**Figure 6: A)** Localization of the FERRY complex in neurons. Overview image: (Scale bar: 20 µm). The boxed regions (blue and green) are highlighted and shown with additional markers (EEA1, Rabankyrin-5) (Scale bar: 2 µm). White arrowheads indicate co-localization of Fy-2, EEA1 and Rabankyrin-5, yellow arrowheads co-



654 localization of Fy-2 and Rabankyrin-5. **B)** Primary rat hippocampal neurons were stained for Fy-2, Rabankyrin-  
655 5, Map2 and a phosphorylated neurofilament (pNF) (Scale bar: 2  $\mu\text{m}$ ). The boxed region is highlighted on the  
656 right (Scale bar: 1  $\mu\text{m}$ ). **C)-E)** Hippocampal neurons stained for Fy-2, EEA1 and *polyA*, or *mdh2* or *uchl1*.  
657 Magnifications and a 3D representation of the indicated regions (grey, blue) are given on the right. (Scale bar: 2  
658  $\mu\text{m}$ ).  
659

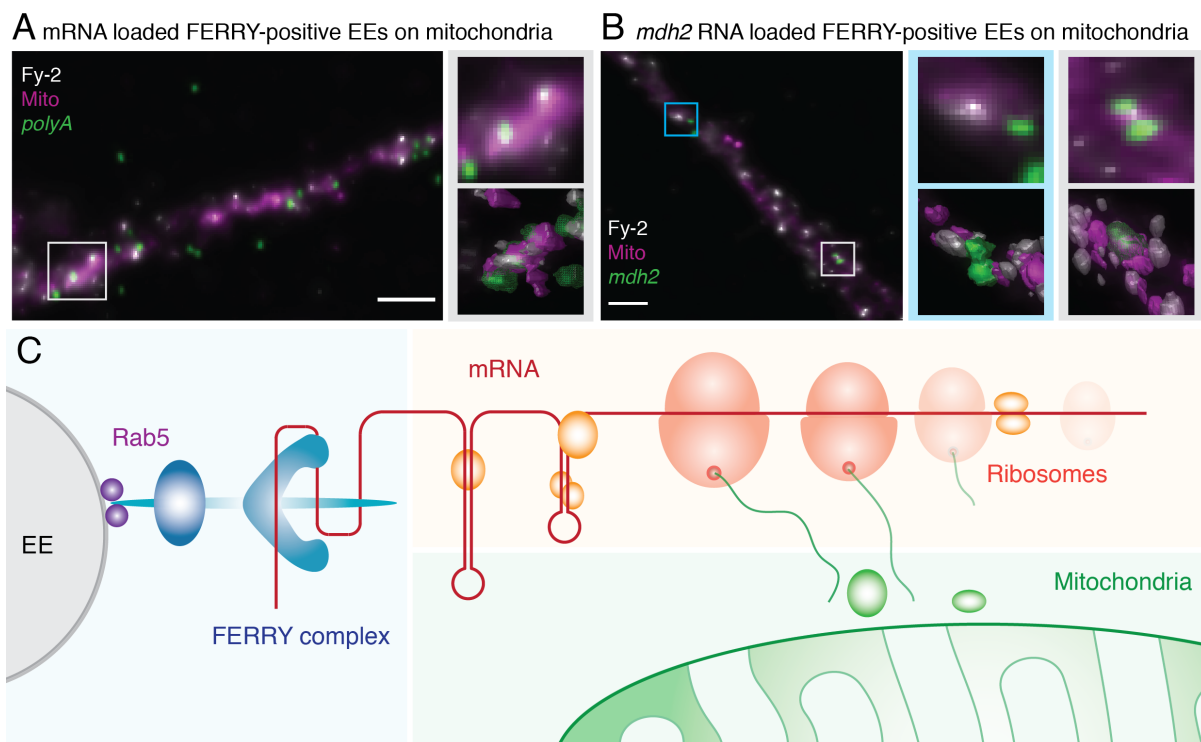

660

661 **Figure 7: A) and B)** Hippocampal neurons stained for Fy-2, TOM70 and *polyA*, or *mdh2*. Magnifications and a  
662 3D representation of the indicated regions (grey, blue) are given on the right. (Scale bar: 2  $\mu$ m). **C)** Scheme of the  
663 cellular role of the FERRY complex.

664

665

## 666 **Material and Methods**

### 667 **Molecular Cloning**

668 Human *fy-1* (Tbck, ENSG00000145348, Q8TEA7), *fy-2* (Ppp1r21, ENSG00000162869,  
669 Q6ZMI0), *fy-3* (C12orf4, ENSG00000047621, Q9NQ89), *fy-4* (Cryz11, ENSG00000205758,  
670 O95825), *fy-5* (Gatd1, ENSG00000177225, Q8NB37) and *rab5a* (ENSG00000144566,  
671 P20339), were amplified by polymerase chain reaction (PCR) using Q5 High-Fidelity DNA  
672 polymerase (NEB) and digested using NotI, NcoI, AscI, XhoI, PciI (NEB) according to the  
673 manufacturer's protocol. *fy-5* was cloned into a pET based bacterial expression vector as an N-  
674 terminally hexahistidine (His<sub>6</sub>) tagged variant without cleavage site. *fy-4* was cloned into an  
675 expression vector for expression in SF9 cells also carrying a non-cleavable N-terminal His<sub>6</sub>  
676 tag. *fy-1*, *fy-2* and *fy-3* were cloned into a multi gene construct based on a pBLA vector. For  
677 the purification of the FERRY complex *fy-1* carried a cleavable N-terminal His<sub>6</sub> tag, the other  
678 2 genes were untagged. To obtain GST-FERRY, *fy-2* carried a cleavable Glutathione-S-  
679 transferase (GST) tag, while *fy-1* and *fy-3* remained untagged. *rab5* was used as GST fusion  
680 variant in the bacterial expression vectors pGAT2 for GST pulldown assays and pGEX-6P-3  
681 for electrophoretic mobility shift assays (EMSAs). Plasmids and primers used in this study are  
682 listed in the resources table ([Table S3](#)).

683

### 684 **Virus production and insect cell expression**

685 SF9 cells growing in ESF921 media (Expression Systems) were co-transfected with linearized  
686 viral genome and the expression plasmid, and selected for high infectivity. P1 and P2 viruses  
687 were generated according to the manufacturer's protocol. Best viruses were used to infect SF9  
688 cells at 10<sup>6</sup> cells/ml at 1% vol/vol and routinely harvested after around 48 hours at about  
689 1.5x10<sup>6</sup> cells/ml. The pellet was suspended in lysis buffer (20 mM HEPES (pH 7.5), 250 mM  
690 NaCl, 20 mM KCl, 20 mM MgCl<sub>2</sub> and 40 mM imidazole) or SEC buffer (20mM HEPES,  
691 pH 7.5, 250mM NaCl, 20mM KCl, 20mM MgCl<sub>2</sub>) supplemented with a protease inhibitor  
692 cocktail, flash frozen in liquid nitrogen and stored at -80 degrees.

693

### 694 **Protein purification**

#### 695 **Fy-5 and GST-Rab5:**

696 For expression of Fy-5 and GST-Rab5, *E. coli* BL21 (DE3) (company) were grown in LB  
697 medium under autoinduction conditions using D-(+)-lactose monohydrate at 1.75% (w/v),  
698 supplemented with the respective antibiotic (50 µg/ml kanamycin or 100 µg/ml ampicillin) at  
699 30 °C under constant shaking (165 rpm). Bacteria were harvested by centrifugation (4000 x g,  
700 20 min, 4 °C), suspended in lysis buffer and subsequently lysed or stored at -80 °C. After  
701 sonication the lysate was clarified by centrifugation (22 500 rpm/61 236 x g, 20 min, 4 °C) and

702 applied to a HisTrap FF column (GE Healthcare) equilibrated with 10 column volumes (CV)  
703 of lysis buffer. After extensive washing with lysis buffer, the proteins were eluted in 10-13 ml  
704 elution buffer (20 mM HEPES (pH 7.5), 250 mM NaCl, 20 mM KCl, 20 mM MgCl<sub>2</sub> and  
705 500 mM imidazole). Elution fractions containing protein were concentrated using Amicon  
706 Ultracel-10K/ Ultracel-30K (Millipore) centrifuge filters and subsequently applied to size  
707 exclusion chromatography (SEC) using a Superdex 200 column (HiLoad 16/600 Superdex  
708 200 pg, GE Healthcare) equilibrated in SEC buffer. Fractions were analysed using SDS-PAGE.  
709 Protein containing fractions were pooled and concentrated to fit experimental requirements.  
710 Protein concentrations were determined by spectrophotometer (NanoDrop Lite, Thermo  
711 Scientific).

#### 712 Fy-4:

713 For expression of Fy-4, insect cell suspensions were lysed using sonication, the lysate  
714 subsequently clarified by centrifugation (22 500 rpm/61 236 x g, 20 min, 4 °C), filtrated using  
715 Millex® HV membrane filter units with a pore size of 0.45 µm (Merck Millipore) and applied  
716 to a HisTrap FF column (GE Healthcare) equilibrated with 10 CV of lysis buffer. After washing  
717 with lysis buffer, the protein was eluted in 10-13 ml elution buffer and concentrated with a  
718 centrifuge filter (Amicon Ultracel-30K, Millipore). Thereafter, the protein was applied to SEC  
719 using a Superdex 200 column (HiLoad 16/600 Superdex 200 pg, GE Healthcare) equilibrated  
720 in SEC buffer. The fractions were analysed by SDS-PAGE. Protein containing fractions were  
721 pooled and concentrated according to experimental requirements. The protein concentration  
722 was determined by spectrophotometer (NanoDrop Lite, Thermo Scientific).

#### 723 **FERRY complex:**

724 SF9 cell pellets prior infected with a virus containing Fy-1, Fy-2 and Fy-3 were melted and  
725 immediately supplemented with an excess of purified Fy-4 and Fy-5 before lysis.  
726 Subsequently, the cells were lysed using a Microfluidizer (LM20, Microfluidics). The lysate  
727 was clarified by centrifugation (22 500 rpm/61 236 x g, 20 min, 4 °C) and filtrated using  
728 membrane filters with a pore size of 0.45 µm (Millex® HV membrane filter units, Merck  
729 Millipore). The clarified lysate was supplemented with Ni-NTA agarose (1.3 ml resin/ 1 l insect  
730 cell pellet, Qiagen) and incubated for 30 mins at 4 °C on a rotating wheel. Subsequently, the  
731 resin was transferred into gravity flow chromatography columns (Poly-Prep® Chromatography  
732 Column, Bio-Rad) and washed 3 times with i) 8 CV lysis buffer, ii) 8 CV wash buffer (20 mM  
733 HEPES, pH 7.5, 250 mM NaCl, 20 mM KCl, 20 mM MgCl<sub>2</sub> and 80 mM imidazole), and iii)  
734 8 CV lysis buffer. The protein was eluted in 1 ml fractions with elution buffer and protein  
735 containing fractions were applied to SEC without further concentration, using either a  
736 Superdex 200 (HiLoad 16/600 Superdex 200 pg, GE Healthcare) or a Superose 6 increase  
737 (Superose 6 Increase 10/300 GL, GE Healthcare) which were equilibrated in SEC buffer.  
738 Protein containing fractions were pooled and concentrated according to experimental  
739 requirements. Concentration was determined by a spectrophotometer (NanoDrop Lite, Thermo  
740 Scientific)

741 **GST-FERRY complex:**

742 SF9 cell pellets prior infected with a virus containing Fy-1, GST-Fy-2 and Fy-3 were melted  
743 and immediately supplemented with an excess of purified Fy-4 and Fy-5. The cells were lysed  
744 using a Microfluidizer (LM20, Microfluidics), the lysate was clarified by centrifugation  
745 (22 500 rpm/61 236 x g, 20 min, 4 °C) and subsequently filtrated using membrane filters with  
746 a pore size of 0.45 µm (Millex® HV membrane filter units, Merck Millipore). The clarified  
747 lysate was supplemented with Glutathione Sepharose 4B (Cytiva, 2.2 ml resin/1 l insect cell  
748 pellet) and incubated for 1.5 h at 4 °C on a rotating wheel. The beads were washed once with  
749 10 ml SEC buffer supplemented with purified Fy-4 and 5 and 2 times with 10 ml SEC buffer.  
750 To elute the GST-FERRY complex, the beads were incubated with GSH buffer (20 mM  
751 HEPES (pH 7.5), 250 mM NaCl, 20 mM KCl, 20 mM MgCl<sub>2</sub>, 20 mM GSH) for 1.5 h at 4 °C  
752 on a rotating wheel and the beads were removed using filter columns (MoBiTec). The protein  
753 complex was concentrated using centrifuge filters (Amicon Ultracel-30K, Millipore) and  
754 subjected to SEC using a Superdex 200 column (HiLoad 16/600 Superdex 200 pg, GE  
755 Healthcare) equilibrated in SEC buffer. Protein containing fractions were pooled and  
756 concentrated according to experimental requirements. Concentration was determined by a  
757 spectrophotometer (NanoDrop Lite, Thermo Scientific)

758 **Rab5:GTPγS:**

759 Expression of Rab5a was performed under autoinduction conditions as described before (Fy-5  
760 and GST-Rab5). Harvested bacterial pellets were resuspended in SEC buffer and lysed using  
761 sonication. Glutathione Sepharose 4B (Cytiva) was added to the clarified lysate and incubated  
762 for 1.5 h at 4 °C. The resin was washed 3 times with SEC buffer and the protein cleaved off  
763 the resin using HRV 3C protease (produced in house) at 4 °C over night on a rotating wheel.  
764 Afterwards, the protein was concentrated using Amicon Ultracel-30K (Millipore) centrifuge  
765 filters and subsequently applied to SEC using a Superdex 200 column (HiLoad 16/600  
766 Superdex 200 pg, GE Healthcare) equilibrated in SEC buffer. Fractions were analyzed using  
767 SDS-PAGE. Protein containing fractions were pooled and concentrated according to  
768 experimental requirements. The protein concentration was determined by a spectrophotometer  
769 (NanoDrop Lite, Thermo Scientific).

770 For the nucleotide loading, Rab5 was concentrated using an Amicon Ultracel-30K (Millipore)  
771 centrifuge filter, subsequently supplemented with 2.5 mM GTPγS and 250 nM of a GST fusion  
772 of the Rab5 GEF domain of Rabex5 (GST-Rabex5-Vps9) and incubated for 1 h on ice. To  
773 remove the Rab5 GEF domain, Glutathione Sepharose 4B (Cytiva) was added to the mixture  
774 and incubated for 1.5 h at 4 °C. The resin was pelleted by centrifugation (12 000 rpm/ 15 300  
775 x g, 10 min, 4 °C) and the supernatant containing the GTPγS loaded Rab5 was flash frozen and  
776 stored at -80 °C. The protein concentration was determined using a BCA assay (Pierce™ BCA  
777 Protein Assay Kit, Thermo Scientific).

778

## 779 **GST pulldown assay**

780 5 nmol of purified GST-Rab5 was incubated with 12  $\mu$ l Glutathione Sepharose 4B (Cytiva) in  
781 100  $\mu$ l SEC buffer in small filter columns (MoBiTec) for 60 min at 4 °C moderately shaking  
782 (700 rpm) in order to saturate the beads with GST protein. Subsequent centrifugation  
783 (2500 rpm/660 x g, 1 min, 4 °C) removed unbound protein and the resin was washed once with  
784 100  $\mu$ l SEC buffer. For nucleotide exchange, 1 mM nucleotide (GDP or GTP $\gamma$ S) and 420 nM  
785 of GST-Rabex5-Vps9 was added to the columns in 100  $\mu$ l SEC buffer and incubated for 60 min  
786 at 4 °C moderately shaking (700 rpm). After centrifugation (2500 rpm/660 x g, 1 min, 4 °C)  
787 and subsequent washing with 100  $\mu$ l SEC buffer, 0.1 nmol FERRY complex was added to the  
788 columns in 100  $\mu$ l SEC buffer and incubated for 20 min at 4 °C on a shaker (700 rpm). Again,  
789 unbound protein was removed by centrifugation (2500 rpm/660 x g, 1 min, 4 °C) and the  
790 columns were washed 3 times with 100  $\mu$ l SEC buffer. Proteins were eluted with 40  $\mu$ l of GSH  
791 buffer (SEC buffer with 20 mM GSH) for 40 min at 4 °C on a shaker (700 rpm) and analysed  
792 by SDS-PAGE and Western blotting.

## 793 **Identifying orthologous sequences**

794 We downloaded all eukaryotic reference proteomes from uniprot (last accessed: March 2<sup>nd</sup>  
795 2020) (UniProt, 2019). We used PorthoMCL (Tabari and Su, 2017) to identify orthologous  
796 clusters containing human FERRY components (GALD1\_HUMAN, QORL1\_HUMAN,  
797 CL004\_HUMAN, PPR21\_HUMAN, TBCK\_HUMAN). Sequences deviating strongly in  
798 length from their human homolog were removed (Table S1). We further distinguished  
799 PPR21\_HUMAN orthologs between sequences which contain a Fy-4 and a Fy-5 binding site  
800 and sequences which do not. For the detection of the presence of the Fy-4 and the Fy-5 binding  
801 sites, we aligned all identified Fy-2 sequences. We considered the binding sites present if all  
802 of the regions aligned to the PPR21\_HUMAN binding regions contained less than 20% gaps  
803 (ignoring gapped sites in PPR21\_HUMAN).

804

## 805 **Phylogenetic tree estimation**

806 All orthologous clusters were scanned for species which contain at least 80% of identified  
807 species with FERRY proteins (custom R script; R 3.6.1; (R Core Team, 2019)). Sequences  
808 belonging to FERRY containing species were extracted and aligned using MAFFT with default  
809 settings (Rozewicki et al., 2019). Each alignment was trimmed using trimAL (Capella-  
810 Gutierrez et al., 2009). The maximum likelihood (ML) tree was estimated using IQTree  
811 (Nguyen et al., 2015) whereby each protein was represented as a partition (Chernomor et al.,  
812 2016). The Whelan and Goldman matrix (Whelan and Goldman, 2001) with ML optimized  
813 amino acid frequencies (WAG+FO) was used as common model for all partitions. Branch  
814 support was calculated by IQTree via ultra-fast bootstrapping (UFBoot, 10,000) (Hoang et al.,  
815 2018). The consensus tree with the presents/absence information was visualized using the  
816 R package ggtree (Version 2.0.4) (Yu et al., 2018; Yu et al., 2017).

817

## 818 **FERRY evolution and ancestral state reconstruction**

819 The identified orthologous genes were used to estimate the ancestral composition of the  
820 FERRY complex. The probability for each protein's presence at each internal node was  
821 estimated using Pagel's algorithm (Pagel, 1994) implemented in the R package ape  
822 (Version 5.3) (Paradis and Schliep, 2019).

823

## 824 **Antibody production**

825 Rabbit polyclonal antibodies against Fy-4 were raised in NZW rabbits using standard  
826 procedures. 200 ug of recombinant protein emulsified in Complete Freund's adjuvant was used  
827 for immunization. Three boosts were done at 4-week intervals using 200 ug of recombinant  
828 protein emulsified in Incomplete Freund's adjuvant. The final bleed was harvested 10 days  
829 after the last boost. Antibodies were affinity-purified on Fy-4 immobilized on a HiTrap NHS-  
830 activated HP column (GE Healthcare). Antibodies were eluted using Pierce Gentle Ag/Ab  
831 Elution Buffer (ThermoFisher).

832 Mouse monoclonal antibodies against different components of the FERRY complex were  
833 raised in Balb/c mice after subtractive immunization (Sleister and Rao, 2001) with Fy-5. Mice  
834 were injected with recombinant Fy-5 in the presence of the immunosuppression drug  
835 cyclophosphamide in order to preferentially eliminate Fy-5-reactive B and T lymphocytes.  
836 Thereafter the mice were immunized with the entire FERRY complex. Hybridoma were  
837 generated using PEG fusions following standard protocols. Clones reacting with individual  
838 components of the FERRY complex were selected in a multiplex electrochemiluminescence  
839 assay on the MSD platform (MesoScale Discovery, Rockville, MD). Antibodies were purified  
840 from hybridoma supernatant using HiTrap Protein G columns (GE Healthcare).

841

## 842 **Antibody validation**

843 Validation of in-house produced antibodies against components of the FERRY complex for  
844 Western blot (WB) were tested against 100 ng, 10 ng and 1 ng of recombinant FERRY  
845 complex. Candidates with high sensitivity (detection of 1 ng) and good selectivity (preferably  
846 no or no interfering additional signal) were chosen.

847 Immunofluorescence (IF) validation of the Fy-2 and Fy-4 antibodies raised for this study for  
848 was performed using the respective FERRY component KO cell lines ([Figure S1F](#)). We  
849 subsequently compared the fluorescence signal in wildtype and the KO cell line. For Fy-2 we  
850 observed a strong reduction of fluorescence signal in *fy-2* Ko cell line, while the fluorescence  
851 of Rabankyrin-5 seems unchanged ([Figure S1C, upper panels](#)). Although the WB indicates the  
852 disappearance of the Fy-2, we cannot rule out that that there is a small fraction of Fy-2 left. We

853 also tried to generate a KO using a full locus deletion of *fy-2*, which had a lethal effect on HeLa  
854 cells. Thus, we did not obtain any clones. The fluorescence signal for Fy-4 almost completely  
855 disappeared in the *fy-4* Ko cell line, while again the Rabankyrin-5 signal seems unchanged  
856 (Figure S1C, lower panels).

857

## 858 **Antibodies**

859 The following primary antibodies were used for IF or WB experiments at the concentrations  
860 or dilutions indicated: anti-EEA1 (rabbit, polyclonal, laboratory-made, IF 1:1000), anti-  
861 Rabankyrin-5 (rat, monoclonal, laboratory-made, IF 1:2000), anti-Map2 (rabbit, polyclonal,  
862 Chemicon, IF 1:1000), anti-pNF-H (mouse, monoclonal, Biolegend, IF 1:5000), anti-Fy-1  
863 (rabbit, polyclonal, Sigma Aldrich, HPA039951, WB 1:1000) anti-Fy-2 (mouse, monoclonal,  
864 laboratory-made, IF 1:1000, WB 0.5 µg/µl), anti-Fy-3 (rabbit, polyclonal, Sigma Aldrich,  
865 HPA037871, WB 1:1000), anti-Fy-4 (rabbit, polyclonal, laboratory-made, IF 1:1000, WB 0.5  
866 µg/µl), anti-Fy-5 (mouse, monoclonal, laboratory-made) WB (0.5 µg/µl), anti-GAPDH (rabbit,  
867 monoclonal, Sigma Aldrich, G8795, WB 1:5000), anti-TNS1 (rabbit, polyclonal, Atlas  
868 Antibodies WB 1:1000), anti-AK4 (rabbit, polyclonal, Atlas Antibodies, WB 1:1000), anti-  
869 PHKA1 (rabbit, polyclonal, Atlas Antibodies, WB 1:1000), anti-Alcam (rabbit, polyclonal,  
870 WB 1:1000), anti-BACE2 (rabbit, polyclonal, Atlas Antibodies, WB 1:1000), anti-MDH2  
871 (rabbit, polyclonal, Atlas Antibodies WB 1:500), anti-MRPL41 (rabbit, polyclonal, Atlas  
872 Antibodies WB 1:1000), anti-Flag (mouse, monoclonal, Sigma Aldrich, WB 1:10000 or  
873 1:7500), anti-RPL3 (rabbit, polyclonal, Proteintech, WB 1:2000) and anti-RPS3a (rabbit,  
874 polyclonal, Proteintech, WB 1:2000).

875 The following fluorescent secondary antibodies for immunostainings were purchased from  
876 Invitrogen and used in a 1:1000 dilution: Goat anti-Rat IgG (H+L) Highly Cross-Adsorbed  
877 Secondary Antibody, Alexa Fluor 488, Goat anti-Mouse IgG (H+L) Highly Cross-Adsorbed  
878 Secondary Antibody, Alexa Fluor 568, Goat anti-Mouse IgG (H+L) Cross-Adsorbed  
879 Secondary Antibody, Alexa Fluor 405, Goat anti-Rabbit IgG (H+L) Cross-Adsorbed  
880 Secondary Antibody, Alexa Fluor 647, F(ab')<sub>2</sub>-Goat anti-Rabbit IgG (H+L) Cross-Adsorbed  
881 Secondary Antibody, Alexa Fluor 647, Goat anti-Mouse IgG (H+L) Cross-Adsorbed  
882 Secondary Antibody, Alexa Fluor 488. For WB horseradish peroxidase (HRP) secondary  
883 antibodies were supplied from Jackson ImmunoResearch and used at a 1:10 000 dilution.

884

## 885 **HEK 293 lysate preparation**

886 FreeStyle™ 293-F Cells (Thermo Fisher Scientific) were grown in suspension culture in  
887 FreeStyle™ 293 Expression Medium (Thermo Fisher Scientific) to density of 4 x 10<sup>6</sup> cells/ml  
888 and harvested by centrifugation (500 x g, 10 min, 20 °C). The cell pellets were suspended in  
889 lysate buffer (6 ml/ liter cell culture, 50 mM HEPES (pH 7.5), 100 mM NaCl, 5 mM MgCl<sub>2</sub>,



890 1 mM DTT, 0.1% Tween 20), supplemented with a protease inhibitor cocktail and immediately  
891 flash frozen in liquid nitrogen. For lysate preparation the pellets were melted, lysed using a  
892 microfluidizer (LM20, microfluidics). The lysate was subsequently clarified by a two-step  
893 centrifugation (4000 rpm/ 1935 x g, 10 min, 4 °C and 22 500 rpm/ 61 236 x g, 25 min, 4 °C),  
894 yielding around 15 ml cells lysate per liter cell culture.

895

## 896 **GST-FERRY interactor screens**

897 The GST-FERRY interactor screen was performed at 4 °C in gravity flow filter columns (Poly-  
898 Prep® Chromatography Column, Bio-Rad). 500 µl Glutathione Sepharose 4B (GE Healthcare)  
899 was added to 0.8 µmol of GST or 7 mg of GST-FERRY complex in 9 ml SEC buffer and  
900 incubated for 2.5 h on a rotating wheel. The solution was let run through and the resulting bed  
901 of beads was washed 3 x 2 ml SEC buffer. 10 ml of freshly prepared HEK 293 lysate was added  
902 to each column and incubated for 1.5 h on a rotating wheel. The lysate was allowed to flow  
903 through and another 5 ml of cell lysate was added to each column and also run through the  
904 column. The columns were extensively washed with 4 ml lysis buffer and 2 x 5 ml and 2 x 7 ml  
905 SEC+ buffer (20 mM HEPES, pH 7.5, 250 mM NaCl, 20 mM KCl, 20 mM MgCl<sub>2</sub>, 1 mM DTT  
906 and 0.1% Tween 20). For the elution of the proteins the columns were incubated with 500 µl  
907 of GSH buffer for 40 min on a rotating wheel. The elution fractions were visualized by SDS  
908 PAGE and further analysed by mass spectrometry.

909 To isolate FERRY-associated RNA, from a HEK 293 lysate the GST-FERRY interactor  
910 experiment was performed as described with slight modifications. For the elution of the  
911 proteins and the associated RNA, RLT buffer from the AllPrep DNA/RNA/miRNA Universal  
912 Kit (Qiagen) was supplemented with 1% β-Mercaptoethanol and 20 mM GSH and the pH  
913 adjusted to 7.5. The subsequent isolation of nucleic acids was performed using the AllPrep  
914 DNA/RNA/miRNA Universal Kit (Qiagen) according to the manufacturer's protocol. The  
915 obtained RNA samples were flash frozen and stored at -80 °C. Prior sequencing, the  
916 concentration of the samples was determined by spectrophotometer (NanoDrop Lite, Thermo  
917 Scientific) and the samples were analyzed using a 2100 Bioanalyzer (Agilent).

918

## 919 **Mass spectrometry**

920 Samples were separated on SDS PAGE, visualized with Coomassie staining and entire gel  
921 lanes cut in 10 pieces each of which was processed individually. Proteins were in-gel reduced  
922 by dithiothreitol (DTT), alkylated by iodoacetamide and digested overnight with trypsin  
923 (Promega). The resulting peptide mixtures were extracted twice by exchange of 5% formic  
924 acid (FA) and acetonitrile, extracts pulled together and dried in a vacuum centrifuge. Peptides  
925 were re-suspended in 25µl of 5% FA and 5µl aliquot was analysed by LC-MS/MS on a  
926 nanoUPLC system interfaced on-line to a Q Exactive HF Orbitrap mass spectrometer (both

927 Thermo Fischer Scientific). The nanoUPLC was equipped with an Acclaim PepMap100 C18  
928 75  $\mu\text{m}$  i.d. x 20 mm trap column and 75  $\mu\text{m}$  x 50 cm analytical column (3 $\mu\text{m}$ /100A, Thermo  
929 Fisher Scientific). Peptides were separated using a 80 min linear gradient; solvent A - 0.1%  
930 aqueous FA, solvent B - 0.1% FA in acetonitrile. Blank runs were introduced after each sample  
931 analysis to minimize carryover. Instrument performance was monitored with QCloud system  
932 (Chiva et al., 2018). Data were acquired using a Top 20 approach; precursor m/z range was  
933 350-1600 and dynamic exclusion time was 20 s. The lock-mass function was set on the  
934 background ion (Si(CH<sub>3</sub>)<sub>2</sub>O)<sub>6</sub> at m/z 445.12. Acquired spectra were converted into the .mgf  
935 format and merged into a single file for each sample.

936 Acquired data were processed with the MaxQuant software package (v.1.6.10.43, (Cox and  
937 Mann, 2008)) using default setting iBAC options, with Match-Between-Runs (MBR) disabled.  
938 Enzyme specificity was trypsin, number of allowed miscleavages – two; variable modification  
939 – cysteine carbamidomethyl, propionamide; methionine oxidation; protein N-terminus  
940 acetylated.

941

## 942 **Mass photometry**

943 Mass Photometry (MP, iSCAMS) of the FERRY complex was performed on a One<sup>MP</sup>  
944 instrument (Refeyn, Oxford, UK) at room temperature. High precision 24 x 50 mm coverslips  
945 (Thorlabs CG15KH) were cleaned with ultrasound, rinsed with isopropanol and water and  
946 dried with clean nitrogen gas (Young et al., 2018). 20  $\mu\text{l}$  diluted FERRY complex (43 and  
947 34 nM, in PBS) was spotted into a reusable culture well gasket with 3 mm diameter and 1mm  
948 depth (Grace Bio-Labs). MP signals were recorded for 60 s at a suitable concentration in order  
949 to detect a sufficient set of target particles (>500). Raw MP data were processed in the  
950 DiscoverMP software (Refeyn, Oxford, UK).

951

## 952 **Sucrose density gradient centrifugation to analyze ribosome association.**

953 Expression of 2xFlag-PreScission protease cleavage site-His<sub>6</sub>-Fy2 was induced in stably  
954 transfected HEK293 cells by addition of 1  $\mu\text{g}/\mu\text{l}$  tetracycline for 24 h. Cells were treated with  
955 100  $\mu\text{g}/\text{ml}$  cycloheximide for 10 min prior to harvesting. Cells were resuspended in Lysis  
956 Buffer (20 mM HEPES pH 7.6, 100 mM KCl, 5 mM MgCl<sub>2</sub>, 0.5% NP-40, 100  $\mu\text{g}/\text{ml}$   
957 cycloheximide, 2 mM DTT, 0.625% Triton-X-100, 0.625% deoxycholate supplemented with  
958 protease and RNase inhibitors) and lysed on ice for 5 min. Cell debris were pelleted by  
959 centrifugation at 10,000 g for 10 min at 4 °C. Extracts were separated on 10-50% sucrose  
960 gradients prepared in Lysis Buffer lacking detergents by centrifugation in an SW-40Ti rotor at  
961 35,000 rpm for 2.5 h (Jaafar et al., 2021). Gradients were fractionated and an absorbance profile  
962 at 260 nm generated using a BioComp Gradient Master (Aquino et al., 2021). Relevant  
963 fractions were pooled and proteins precipitated using 20% trichloroacetic acid. Proteins were

964 separated by SDS-PAGE and analyzed by WB using anti-Flag (Sigma-Aldrich F3165; 1:7500),  
965 anti-RPL3 (Proteintech 11005-1-AP; 1:2000) and anti-RPS3a (Proteintech 14123-1-AP;  
966 1:2000) antibodies.

967

## 968 **Library preparation and Sequencing**

969 mRNA was enriched from 100ng DNase treated total RNA using the NEBNext rRNA  
970 depletion Kit (human, mouse, rat, NEB) according to the manufacturer's instructions. Final  
971 elution was done in 5  $\mu$ l nuclease free water. Samples were then directly subjected to the  
972 workflow for strand specific RNA-Seq library preparation (NEBNext Ultra II Directional RNA  
973 Library Prep, NEB). 0.15  $\mu$ M NEB Adaptor were used for ligation. Non-ligated adaptors were  
974 removed by adding XP beads (Beckmann Coulter) in a ratio of 1:0.9. Dual indexing (GST-  
975 FERRY association screen) or unique dual indexing (RNASeq of FERRY component KO cell  
976 lines) was done during the following PCR enrichment (12 cycles, 65°C). After two more XP  
977 bead purifications (1:0.9) libraries were quantified using the Fragment Analyzer (Agilent).  
978 Libraries were equimolarly pooled before sequencing them with a length of 75 bp in single end  
979 mode on an Illumina NextSeq 500 system to a depth of at least  $2 \times 10^7$  reads (GST-FERRY  
980 association screen) or with a length of 2 x 150 bp in paired end mode on an Illumina NovaSeq  
981 600 system to a depth of at least  $5 \times 10^7$  read pairs (RNASeq of FERRY component KO cell  
982 lines).

983

## 984 **Analysis of the mass spectrometry data**

985 From the MaxQuant proteinGroups.txt file only protein groups with at least 1 unique peptide  
986 and which were identified in at least two out of three biological replicates in at least one  
987 condition were considered for differential abundance analysis using DEP v1.4.0 (Zhang et al.,  
988 2018). After variance stabilizing normalization (Huber et al., 2002) of iBAQ intensities,  
989 missing values were imputed applying the nearest neighbor averaging imputation method  
990 (KNN) to missing at random (MAR) and left-censored imputation using a deterministic  
991 minimal value approach (MinDet) to missing not at random (MNAR) protein groups (Gatto et  
992 al., 2021). MNARs refer to those protein groups with missing values in all replicates of one of  
993 the two conditions while all other missing values are considered as MAR. The application of  
994 empirical Bayes statistics on protein group-wise linear models was done using limma (Ritchie  
995 et al., 2015) and differentially abundant proteins were identified by applying a log<sub>2</sub> fold change  
996 threshold of 1 and an adjusted p-value cutoff of 0.05.

997

## 998 **Analysis of the RNA sequencing data**

999 Raw reads were checked for their overall quality using FastQC v0.11.2 (Andrews, 2010). Read  
1000 mapping to the human genome reference assembly (GRCh38\_p13) and genes counts

1001 estimation based on Ensembl release v99 (Yates et al., 2020) were done using STAR v2.5.2b  
1002 (--outFilterMultimapNmax 1 --outSJfilterCountUniqueMin 8 3 3 3 --quantMode GeneCounts;  
1003 (Dobin et al., 2013) by taking read strandedness into account. Count data were filtered for  
1004 genes with more than 10 counts in any sample and served as input for differential gene  
1005 expression analysis using DESeq2 v1.22.1 (Love et al., 2014). An adjusted p-value cutoff of  
1006 0.01 was applied to FDRs obtained by using IHW v1.10.1 (Ignatiadis et al., 2016). Results  
1007 summary in form of a MA plot was done using ggplot2 v3.2.1 (Wickham, 2016) following  
1008 layout settings from the ggpubr package v0.2.5 (Kassambara, 2020). A gene set enrichment  
1009 analysis against the MSigDB C5 collection of ontology sets (msigdb v7.2.1, (Dolgalev, 2020))  
1010 was run using fgsea v1.8.0 (Korotkevich et al., 2021) excluding gene sets with less than 15 and  
1011 more than 500 genes (Subramanian et al., 2005).

1012

### 1013 **Rab5 affinity chromatography**

1014 GST-Rab5 affinity chromatography was carried out as described before (Christoforidis et al.,  
1015 1999). In summary, GST-Rab5:GDP or GST-Rab5:GTP $\gamma$ S loaded glutathione Sepharose was  
1016 incubated with bovine brain cytosol, the beads extensively washed and the bound proteins  
1017 subsequently eluted. The resulting mixture of Rab5 effector proteins was further purified by  
1018 SEC and anion exchange chromatography. Fractions were analyzed using silver stained SDS  
1019 PAGE.

1020

### 1021 ***In vitro* translation binding assay**

1022 Binding assays with *in vitro* translated proteins were essentially performed as described  
1023 (Nielsen et al., 2000). Briefly, [<sup>35</sup>S]-methionine-labelled proteins were transcribed and  
1024 translated using a TnT™ coupled transcription–translation kit (Promega) according to the  
1025 manufacturer’s protocol. Resulting proteins were incubated with GST-Rab5:GDP or GST-  
1026 Rab5:GTP $\gamma$ S loaded Glutathione Sepharose for 2 h at 4 °C. Subsequently, the beads were  
1027 washed and Rab5-bound proteins were eluted and analyzed by SDS PAGE and fluorography  
1028 as described (Christoforidis et al., 1999).

1029

### 1030 **mRNA production and electrophoretic motility shift assays (EMSAs)**

1031 mRNA sequences for *mrpl41*, *mdh2*, *uchl1*, *atp5f1b*, *gstp1*, *prdx5*, *cox6b*, *cox8a* and *pigl*  
1032 comprise the coding region, the 3’ and 5’ untranslated regions (UTRs) and an additional polyA  
1033 appendix of 50 adenines (Table S3). The mRNAs were produced by *in vitro* transcription using  
1034 the T7 RiboMAX™ Express Large Scale RNA Production System (Promega) according to the  
1035 manufacturer’s protocol. Resulting RNA was purified using a Phenol:Chloroform extraction  
1036 and an isopropanol precipitation as described in the manual of the mMACHINE  
1037 mMACHINE™ T7 Transcription kit (Thermo Fisher). In brief, the *in vitro* transcription

1038 reactions were quenched with Ammonium acetate stop solution from the mMACHINE  
1039 mMACHINE™ T7 Transcription Kit (Thermo Fisher) and supplemented with  
1040 Phenol:Chloroform:Isoamyl Alcohol 25:24:1 (Sigma Aldrich). The aqueous phase was  
1041 recovered and RNA precipitated by adding equal amounts of isopropanol. After chilling at  
1042 - 20 °C for at least 15 min, the precipitated RNA was pelleted by centrifugation (20 800 x g,  
1043 15 min, 4 °C), the supernatant removed and the pellet resuspended in RNase-free water. RNA  
1044 concentrations were determined by spectrophotometer (NanoDrop Lite, Thermo Scientific)  
1045 and the RNA was stored at - 80 °C until usage.

1046 For direct protein-RNA interaction assays, 10 pmol of FERRY complex was mixed with  
1047 *in vitro* transcribed mRNA in varying protein/RNA ratios in SEC buffer in a total volume of  
1048 20 µl and incubated for 80 min at 37 °C. The samples were analyzed using gel electrophoresis  
1049 with 1% agarose gels. Gels were always run as duplicates and one gel stained for RNA using  
1050 SYBR™ Gold Nucleic Acid Gel Stain (Invitrogen) the other stained for proteins with SYPRO  
1051 Red Protein Gel Stain (Sigma Aldrich). Both dyes were used according to the manufacturers'  
1052 protocols.

1053 Direct protein-RNA interaction assays in presence of Rab5:GTPγS were performed, with 15  
1054 pmol of *mrpl41* mRNA mixed with 15 pmol FERRY complex and varying amounts of  
1055 Rab5:GTPγS as indicated in the respective figure in SEC buffer in a total volume of 35 µl. The  
1056 mixture was incubated for 80 min at 37 °C and the samples were analyzed by ethidium  
1057 bromide-stained gel electrophoresis using 1% agarose gels.

1058

### 1059 **RNA immunoprecipitation after UV crosslinking**

1060 Stably transfected HEK293 cell lines for the tetracycline inducible expression of 2xFlag-  
1061 PreScission protease cleavage site-His6-Fy2, Fy2-His6-PreScission protease cleavage site-  
1062 2xFlag or the tag alone were generated using the HEK293 Flp-In T-REx system  
1063 (ThermoFischer Scientific). Expression of the transgenes was induced by addition of 1 µg/µl  
1064 tetracycline for 24 h, and cells were grown in the presence of 100 µM 4-thiouridine for 9 h  
1065 before crosslinking with 360 mJ/cm<sup>2</sup> irradiation at 365 nm (Choudhury et al., 2019; Memet et  
1066 al., 2017; Sloan et al., 2015). Cells were harvested, resuspended in a buffer containing 50 mM  
1067 Tris-HCl pH 7.8, 150 mM NaCl, 1.5 mM MgCl<sub>2</sub>, 0.1% NP40, 5 mM β-mercaptoethanol,  
1068 cOmplete-EDTA-free protease inhibitors and lysed by sonication. RNA-protein complexes  
1069 were retrieved from the cleared lysate on anti-Flag M2 beads (Sigma Aldrich) and eluted using  
1070 3x Flag peptide. Co-purified RNAs were subjected to partial RNase digestions using RNase-It  
1071 (Agilent Technologies) and complexes were immobilized on Ni-NTA under denaturing  
1072 conditions (50 mM Tris-HCl pH 7.8, 300 mM NaCl, 10 mM imidazole 6 M guanidium-HCl,  
1073 0.1% NP40, 5 mM β-mercaptoethanol). Alkaline phosphatase treatment was performed before  
1074 labelling of the RNA fragment 5' ends with [<sup>32</sup>P] using T4 PNK. Complexes were eluted from  
1075 the Ni-NTA using imidazole and precipitated with 20% trichloroacetic acid before separation

1076 by denaturing polyacrylamide gel electrophoresis and transfer to a nitrocellulose membrane.  
1077 Labelled RNAs in the eluate were then detected by autoradiography and proteins were  
1078 subjected to WB using an anti-Flag antibody (Sigma-Aldrich F3165; 1:10000).

1079

1080

1081

1082

1083

1084

1085

1086

1087

1088

1089

1090

1091

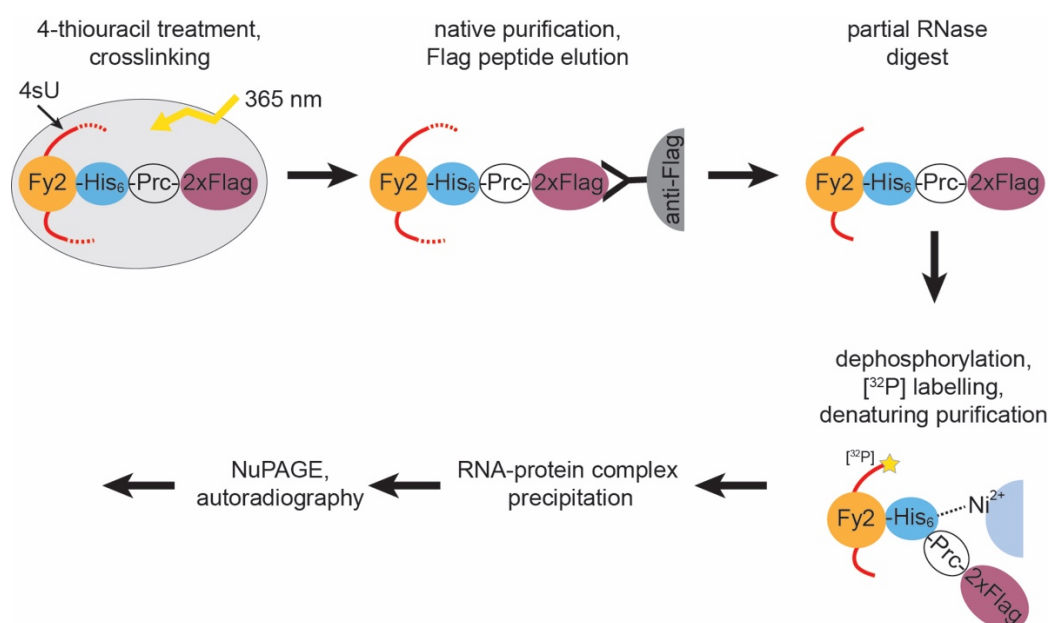

1092 **Generation knockout (KO) cell lines**

1093 **Generation HeLa knockout (KO) cell lines by induced random mutations**

1094 To generate gene knockouts in HeLa, we used CRISPR/Cas9 cleavage induced random (NHEJ  
1095 mediated) mutations using guide RNAs targeted 5' end of the coding sequence of the genes of  
1096 interest. We used electroporation of Cas9 protein complexed with crRNA and trRNAs (altR,  
1097 IDT), using the Neon electroporator device and kits (Invitrogen) with concentrations and  
1098 electroporation settings as previously described (Spiegel et al., 2019). For list of crRNA  
1099 protospacers used for each gene, see the resources table ([Table S3](#)). The success of the gene  
1100 disruption was initially assessed by Western blot of single cell derived clones. The disruption  
1101 of the target alleles was further confirmed by fluorescent PCR and Sanger sequencing of PCR  
1102 amplicons (For the genotyping primers used and description of the alleles, see the resources  
1103 table ([Table S3](#))).

1104 **Generation of a *fy-2* KO in HeLa cells by critical exon deletion**

1105 In order to generate a *fy-2* knockout in HeLa cells, we deleted exon 6 to 7 (deletion of ca. 1340  
1106 bp). Deletion of these two exons generates an out-of-frame transcript with a premature stop  
1107 codon which leads to a truncated protein of 187 aa.

1108 Guide RNAs specific to the *fy-2* locus were selected based on low off-target activity using  
1109 <http://crispor.tefor.net>. The guide RNAs were ordered as crRNA from Integrated DNA  
1110 Technologies (IDT).

1111 HeLa cells were transfected with Cas9 protein (IDT Cat.no. 1081061) complexed with crRNA  
1112 (IDT, Alt-R®) and tracrRNA (IDT Cat.no. 1072534) using the Neon electroporator device and  
1113 kits (Invitrogen) with concentrations and electroporation settings as previously described  
1114 (Spiegel et al., 2019). For a list of crRNA protospacers used for each condition, see the  
1115 resources table (Table S3). 72 h post-transfection cells were single-cell sorted into 96-well  
1116 plates. Cell sorting was performed in a BD FACSAria Fusion flow cytometer (Beckton  
1117 Dickinson). Single-cell clones were genotyped by PCR. Briefly, genomic DNA was extracted  
1118 using the QuickExtract DNA extraction kit (Epicentre) following the manufacturer's  
1119 instructions. PCR was performed using Phusion Flash High-Fidelity PCR Master Mix  
1120 (ThermoFisher) with gene-specific primers. Amplicons of the deleted alleles were verified by  
1121 Sanger Sequencing. For the genotyping primers used and description of the alleles, see the  
1122 resources table (Table S3).

1123

#### 1124 **HeLa cell culture**

1125 HeLa Kyoto and FERRY subunit knock-out cells were cultured in DMEM media supplemented  
1126 with 10% FBS Superior (Merck) and 50 µg/ml streptomycin (P/S) (Gibco) at 37°C with 5%  
1127 CO<sub>2</sub>. For smFISH studies, cells were seeded into 384 well plates at a density of 3000 cells/well  
1128 in 50 µl using the drop dispenser (Multidrop, Thermo Fischer Scientific) and cultured for 24h.

1129

#### 1130 **Single molecule fluorescence in situ hybridization (smFISH) and immunostaining**

1131 Endosomes and endogenous mRNAs were stained by using the ViewRNA® Cell Plus Assay  
1132 kit (Invitrogen, 88-19000). The kit consists of 16 solutions that are used to perform an immuno-  
1133 fluorescence staining followed by a single molecule fluorescence in situ hybridization  
1134 (smFISH) using the sequential branched-DNA amplification technique. The manufactures  
1135 protocol for 96 well plates was adapted to a 384 well plate format by down-scaling to  
1136 12.5 µl/well for steps containing staining solutions and to 25 µl/well for steps containing  
1137 washing/fixing solutions (96 well protocol: 50 µl and 100 µl, respectively). For details see the  
1138 manufactures protocol ([https://assets.thermofisher.com/TFS-Assets/LSG/manuals/88-  
1139 19000.pdf](https://assets.thermofisher.com/TFS-Assets/LSG/manuals/88-19000.pdf)).

1140 In brief, all steps were performed manually using an 8-channel aspirator for removal and  
1141 automated multi-channel pipettes for addition of liquids. All wash steps following fixation and  
1142 immunostaining were done 3 times with PBS including RNase inhibitor solution, whereas all  
1143 wash steps following smFISH were done 5 times with RNA wash buffer solution. Cells were  
1144 fixed and permeabilized using the provided solutions of the kit. After washing with PBS, cells

1145 were incubated with blocking buffer, primary antibody solution (including EEA1 and Fy-2  
1146 antibodies at a dilution of 1:2000 and 1:1000, respectively) and secondary solutions (including  
1147 antibodies against rabbit and mouse IgG labelled with Alexa 488 or Alexa 568 (Alexa 647 for  
1148 probe HPRT1), respectively, at a dilution of 1:500). After immunostaining cells were fixed and  
1149 ready for smFISH. Different probes were used to label different mRNAs (Invitrogen, all probes  
1150 were of type 6 (647nm), except the house-keeping gene HPRT1 (type 1, 546nm);  
1151 *atp5f1b*: VA6-3168504, *gla*: VA6-3168560, *gstp1*: VA6-3169160, *cox6b*: VA6-3171299,  
1152 *cox8a*: VA6-3171305, *mdh2*: VA6-3172506, *mrpl41*: VA6-3169863, *mrps35*: VA6-3179781,  
1153 *psma1*: VA6-3173135, *polyA*: VF6-12675, *rims1*: VA6-3176214 and *hprt1*: VA1-11124).  
1154 Cells were incubated for 2h at 40°C with a diluted probe. After washing the cells with RNA  
1155 wash buffer solution, the protocol was continued the next day with the smFISH branched-DNA  
1156 amplification technique steps. Subsequently, cells were incubated with pre-amplifier, amplifier  
1157 and label solution each for 1h at 40°C. Finally, the cells were stored in PBS containing DAPI  
1158 (1µg/ml) to stain the nuclei and CellMaskBlue (CMB) (0.25µg/ml) to stain the cytoplasm.

1159

## 1160 **Preparation of hippocampal cultures**

1161 Primary rat hippocampal neurons used in this study were obtained and cultured in two different  
1162 ways. For initial Fy-2 localization experiments, the protocol for culturing hippocampal neurons  
1163 was adapted from (Goto-Silva et al., 2019) with slight modifications. In brief, neurons were  
1164 isolated from rat embryos at E17. The rat hippocampi from embryos of either sex were  
1165 dissected in PBS (25 mM Na-phosphate buffer, pH 7.4, 110 mM NaCl, 1 mM EDTA) and  
1166 dissociated in digestion solution (100 mg/ml DNase I and 200 Units Papain in PBS) for  
1167 20 min. After two washes of the tissue with plating medium (DMEM containing 10% FCS,  
1168 2 mM glutamine, 50 mg/ml penicillin/streptomycin, Invitrogen), it was triturated in plating  
1169 medium and subsequently cells counted. The neurons were plated on glass cover slips coated  
1170 with 1 mg/ml poly-L-lysine (Sigma-Aldrich) at a density of 25 000 cells/ml in the presence of  
1171 a mouse astrocyte feeder layer, derived from the mouse cortex from mice of age P0-P3 of either  
1172 sex (Kaech and Banker, 2006).

1173 Primary neurons for mRNA localization experiments were obtained and cultured according to  
1174 the following protocol. Neuronal cultures were prepared from dissociated hippocampi of P0/P1  
1175 SD rats as previously described (Cajigas et al., 2012). Hippocampi were collected in  
1176 Dissociation Medium on ice (DM with 1 mM HEPES, 82 mM Na<sub>2</sub>SO<sub>4</sub>, 30 mM K<sub>2</sub>SO<sub>4</sub>, 5.8 mM  
1177 MgCl<sub>2</sub>, 0.252 mM CaCl<sub>2</sub>, 20 mM Glucose, 0.001% Phenol Red) and treated with cysteine-  
1178 activated papain solution in DM (10 ml DM, 3.2 mg Cysteine, 300 µl Papain Sigma P3125, pH  
1179 readjusted to 7, filtered sterile) two times 15 min at 37°C before several washes with cold DM  
1180 and Neuronal growth medium (NGM: Neurobasal A supplemented with B27 and Glutamax).  
1181 Dissociation of the tissue was achieved by trituration through a 10 ml pipette for 10 times.  
1182 Before counting in a Neubauer chamber, cells were pelleted by centrifugation for 5 min, 67 x g  
1183 at 4 °C, resuspended in cold NGM and 30 000 cells were seeded in 250 µl NGM on poly-D-



1184 Lys coated 14 mm MatTek glass bottom dishes. After attachment of the cells (2-3 h later)  
1185 0.7 ml conditioned NGM (80% NGM, 15% glia-conditioned NGM, 5% cortical neuron-  
1186 conditioned NGM) was added and regular feeding by addition of NGM was performed  
1187 thereafter. The neurons were kept in an incubator at 37°C in a humidified atmosphere with 5%  
1188 CO<sub>2</sub>.

1189

## 1190 **Animals**

1191 The rat pups were used without gender determination. Timed pregnant rats were purchased  
1192 from either Janvier (RjHan:WI - Wistar rats) or Charles River Laboratories, maintained under  
1193 food and water ad libitum in a 12h-12h light dark cycle until pups were delivered, pups were  
1194 sacrificed shortly after birth by decapitation with sharp scissors before dissection of the tissue.  
1195 The procedures involving animal treatment and care were conducted in conformity with the  
1196 institutional guidelines that are in compliance with the national and international laws and  
1197 policies (DIRECTIVE2010/63/EU; German animal welfare law, FELASA guidelines) and  
1198 approved by and reported to the local governmental supervising authorities  
1199 (Regierungspräsidium Darmstadt and Landesdirektion Sachsen). The animals were euthanized  
1200 according to annex 2 of §2 Abs. 2 Tierschutz-Versuchstier-Verordnung.

1201

## 1202 **Immunostaining of neurons**

1203 Immunostaining was performed at room temperature and the plates were subsequently stored  
1204 at 4 °C if necessary. After adhesion, cells were washed once with PBS and fixed using 3%  
1205 Paraformaldehyde (PFA) for 15 min. After washing with PBS, residual PFA was quenched  
1206 using 500 mM Ammonium chloride in PBS for 10 min and the cells were washed 3 times with  
1207 PBS. For permeabilization the cells were treated with 0.1% Triton X-100 in PBS for 3 min and  
1208 subsequently washed three times with PBS. After blocking with 10% FBS for 20 min, the cells  
1209 were incubated with the primary antibody for 2 h. Before and after the application of the  
1210 secondary antibody for 1 h, the cells were washed 3 times with PBS.

1211

## 1212 **High sensitivity FISH and immunostaining in neurons**

1213 In situ hybridization was performed using the ViewRNA ISH Cell Assay Kit (Thermo Fisher)  
1214 according to the manufacturer's protocol with the modifications described previously (Cajigas  
1215 et al., 2012). Probe sets targeting the respective mRNAs were purchased from Thermo Fisher.  
1216 In brief, rat hippocampal neuron cultures grown for two weeks on MatTek glass bottom dishes  
1217 were fixed for 20 min with PBS containing 1mM MgCl<sub>2</sub>, 0.1 mM CaCl<sub>2</sub>, 4% Sucrose and 4%  
1218 PFA, pH 7.4 at room temperature, washed and subsequently permeabilized for 3 min with the  
1219 provided detergent solution. Gene specific type1 (*uchl1*) and type6 (*mdh2*, *polyA*) probe sets  
1220 were applied in 1:100 dilution for 3 h at 40°C. After several washes signal amplification steps

1221 with PreAmp/Amp and Label Probe reagents coupled to a 550 nm dye were all performed for  
1222 1 h at 40°C followed by washes at room temperature after each step. All probe sets and  
1223 branched DNA reagents were diluted in the provided solutions 1:100. Immunostaining for Fy-  
1224 2, endosome and mitochondria markers was performed after completion of the FISH protocol.  
1225 FISH-stained cells were blocked for 30 min in blocking buffer (BB) at room temperature (BB:  
1226 PBS with 4% goat serum) and incubated with primary antibodies in BB for 1 h at room  
1227 temperature. After washing, secondary antibodies in BB were applied for 30 min, cells were  
1228 washed and nuclei stained by a 3 min incubation with 1 µg/µl DAPI in PBS. Cells were washed  
1229 in PBS and mounted with Aquapolymount (Polysciences).

1230

## 1231 **Microscopy**

### 1232 **automated HeLa imaging:**

1233 Confocal imaging was performed on an automated spinning disc confocal microscope  
1234 (Yokogawa CV7000) using a 60x 1.2NA objective. DAPI and CMB was acquired with a laser  
1235 excitation at 405 nm and an emission band pass filter BP445/45, Alexa 488 with a 488 nm laser  
1236 and BP525/50 filter, Alexa 568 with a 561 nm laser and BP600/37 filter, Alexa 647 with a  
1237 640 nm laser and a BP676/29 filter. 9 fields were acquired per well as a stack with 4 z-planes  
1238 and 1 µm distance. Each condition was done in duplicate wells and three independent  
1239 experiments.

### 1240 **Spinning disk neuron imaging:**

1241 Neurons were imaged on a Nikon TiE spinning disk microscope equipped with a 100x/ 1.45NA  
1242 Plan Apochromat, DIC oil immersion objective, Yokogawa CSU-X1 scan head and a Andor  
1243 DU-897 back-illuminated CCD detector. Images were acquired with 600 ms exposure, while  
1244 the laser intensities were adapted to the respective antibodies and requirements. Overview  
1245 images of almost entire neurons were taken as a set of individual small images (6 x 6 images)  
1246 with an overlap of 5% and combined using the Fiji implemented Grid/Collection Stitching tool  
1247 (Preibisch et al., 2009) without overlap computation.

### 1248 **confocal neuron imaging:**

1249 Images were acquired with a LSM780 confocal microscope (Zeiss) equipped with Zen10  
1250 software using a 63x/1.46-NA oil objective (alpha Plan Apochromat 63x/1.46 oil DIC M27)  
1251 and Argon 488, DPSS 561 and HeNe 633 laser lines for excitation in single tracks and a  
1252 MBS488/561/633 beam splitter. Images were acquired in 12-bit mode as z-stacks and a time  
1253 series with 4x Zoom, 512px x 512 px resolution and 0.1 µm Tetraspec beads (ThermoFisher)  
1254 imaged under the same conditions. The laser power and detector gain in each channel was set  
1255 to cover the full dynamic range but avoid saturated pixels.

1256

## 1257 **Image analysis**

### 1258 **HeLa cell images**

1259 Microscopy images for the localization of Fy-2, EEA1 and different mRNAs in HeLa cells  
1260 were processed using the stand-alone freely available software MotionTracking (MT)  
1261 (<http://motiontracking.mpi-cbg.de>). Images of were imported into MT and subsequently  
1262 corrected for the chromatic shift of individual channels based on images of Tetraspec beads.  
1263 For quantification, fluorescent foci of EEA1 and mRNA were detected using automated object  
1264 detection and the co-localization was calculated based on 0.35 overlap threshold (Collinet et  
1265 al., 2010; Kalaidzidis et al., 2015). Colocalization markers on endosomes with and without  
1266 Bayesian correction for random colocalization was performed using MT as is described in  
1267 (Kalaidzidis et al., 2015).

### 1268 **Neuron images**

1269 Microscopy images for the localization of Fy-2, EEA1, mRNA and mitochondria in neurons  
1270 were also processed with MT. Image sequences of fixed neurons were imported into MT and  
1271 drift corrected and deconvoluted by algorithms implemented in MT. In a last step, images were  
1272 corrected for the chromatic shift of individual channels based on images of Tetraspec beads  
1273 before and after the imaging. Motion Tracking implemented object detection was used to  
1274 determine the mRNA foci while subsequent image analysis and quantification was performed  
1275 by visual inspection. Given the possible distance between the fluorescence signals of EEA1  
1276 and mRNA or Fy-2 and mRNA ([Figure S4A](#)), automated object detection followed by a co-  
1277 localization analysis was not suitable for this purpose.

### 1278 **Multiple source localization microscopy (Musical)**

1279 Samples were prepared in fresh STORM buffer as described in (Franke et al., 2019). Image  
1280 stack acquisition was performed with a Spinning Disc, Andor- Nikon TiE inverted stand  
1281 microscope equipped with a spinning disc scan head (CSU-X1; Yokogawa), a fast piezo  
1282 objective z-positioner (Physik Instrumente), a back-illuminated EMC CD camera (iXon EM+  
1283 DU-897 BV; Andor), a Nikon Apo 100x 1.45 Oil DIC objective and a OptoVar 1.5 lens (pixel  
1284 size in x-y plane is 70.1nm). Samples were z-scanned for 2.5 $\mu$ m with 0.25 $\mu$ m steps. At each z-  
1285 position for 3 channels (488, 561 and 647) 50 snap-shot images were acquired and 405 nm  
1286 laser was used to re-activate fluorophores before moving to the next z-position. The multiple  
1287 fluorophore localization was performed by algorithm described in (Agarwal and Machan,  
1288 2016) as it implemented in MT.

1289

### 1290 **Western blotting**

1291 Cells were collected from a 10 cm cell culture dish, washed with cold PBS and subsequently  
1292 lysed in PBS supplemented with 1% Triton X-100. HeLa cell lysates were clarified by  
1293 centrifugation (14 000 rpm/ 20 800 x g, 15 min, 4 °C) and the concentration determined using

1294 a BCA assay (Pierce™ BCA Protein Assay Kit, Thermo Scientific). After running an SDS  
1295 PAGE (12%), the gel was subsequently transferred onto a nitrocellulose membrane  
1296 (Amersham). Blots were washed with PBST (PBS supplemented with 0.1% Tween 20) and  
1297 then incubated with WB blocking buffer (5% non-fat milk powder in PBST) over night at 4 °C.  
1298 After washing with PBST blots were then incubated with the primary antibodies (anti-Fy-1 to  
1299 anti-Fy-5 and anti-GAPDH as a loading control) at the dilutions indicated earlier for 1 h at  
1300 room temperature. After washing the secondary HRP antibody was applied to the blot for 1 h  
1301 at room temperature. All antibodies were added in PBST with 5% milk. The blots were  
1302 developed using ECL™ Western Blotting Reagents (Cytiva) on respective films (Amersham)  
1303 in a Kodak X-OMAT 200 Processor.

1304

1305

## 1306 **References**

- 1307 Agarwal, K., and Machan, R. (2016). Multiple signal classification algorithm for super-  
1308 resolution fluorescence microscopy. *Nat Commun* 7, 13752.
- 1309 Andreassi, C., Zimmermann, C., Mitter, R., Fusco, S., De Vita, S., Saiardi, A., and Riccio, A.  
1310 (2010). An NGF-responsive element targets myo-inositol monophosphatase-1 mRNA to  
1311 sympathetic neuron axons. *Nat Neurosci* 13, 291-301.
- 1312 Andrews, S. (2010). FastQC: A Quality Control Tool for High Throughput Sequence Data (  
1313 <http://www.bioinformatics.babraham.ac.uk/projects/fastqc/>).
- 1314 Aquino, G.R.R., Hackert, P., Krogh, N., Pan, K.T., Jaafar, M., Henras, A.K., Nielsen, H.,  
1315 Urlaub, H., Bohnsack, K.E., and Bohnsack, M.T. (2021). The RNA helicase Dbp7 promotes  
1316 domain V/VI compaction and stabilization of inter-domain interactions during early 60S  
1317 assembly. *Nat Commun* 12, 6152.
- 1318 Becalska, A.N., and Gavis, E.R. (2009). Lighting up mRNA localization in *Drosophila*  
1319 oogenesis. *Development* 136, 2493-2503.
- 1320 Beck-Wodl, S., Harzer, K., Sturm, M., Buchert, R., Riess, O., Mennel, H.D., Latta, E.,  
1321 Pagenstecher, A., and Keber, U. (2018). Homozygous TBC1 domain-containing kinase  
1322 (TBCK) mutation causes a novel lysosomal storage disease - a new type of neuronal ceroid  
1323 lipofuscinosis (CLN15)? *Acta Neuropathol Commun* 6, 145.
- 1324 Bhoj, E.J., Li, D., Harr, M., Edvardson, S., Elpeleg, O., Chisholm, E., Juusola, J., Douglas, G.,  
1325 Guillen Sacoto, M.J., Siquier-Pernet, K., *et al.* (2016). Mutations in TBCK, Encoding TBC1-  
1326 Domain-Containing Kinase, Lead to a Recognizable Syndrome of Intellectual Disability and  
1327 Hypotonia. *Am J Hum Genet* 98, 782-788.
- 1328 Briese, M., Saal, L., Appenzeller, S., Moradi, M., Baluapuri, A., and Sendtner, M. (2016).  
1329 Whole transcriptome profiling reveals the RNA content of motor axons. *Nucleic Acids Res* 44,  
1330 e33.
- 1331 Buxbaum, A.R., Haimovich, G., and Singer, R.H. (2015). In the right place at the right time:  
1332 visualizing and understanding mRNA localization. *Nat Rev Mol Cell Biol* 16, 95-109.
- 1333 Cajigas, I.J., Tushev, G., Will, T.J., tom Dieck, S., Fuerst, N., and Schuman, E.M. (2012). The  
1334 local transcriptome in the synaptic neuropil revealed by deep sequencing and high-resolution  
1335 imaging. *Neuron* 74, 453-466.
- 1336 Capella-Gutierrez, S., Silla-Martinez, J.M., and Gabaldon, T. (2009). trimAl: a tool for  
1337 automated alignment trimming in large-scale phylogenetic analyses. *Bioinformatics* 25, 1972-  
1338 1973.
- 1339 Cezanne, A., Lauer, J., Solomatina, A., Sbalzarini, I.F., and Zerial, M. (2020). A non-linear  
1340 system patterns Rab5 GTPase on the membrane. *Elife* 9.
- 1341 Chernomor, O., von Haeseler, A., and Minh, B.Q. (2016). Terrace Aware Data Structure for  
1342 Phylogenomic Inference from Supermatrices. *Syst Biol* 65, 997-1008.
- 1343 Chiva, C., Olivella, R., Borrás, E., Espadas, G., Pastor, O., Sole, A., and Sabido, E. (2018).  
1344 QCloud: A cloud-based quality control system for mass spectrometry-based proteomics  
1345 laboratories. *PLoS One* 13, e0189209.
- 1346 Chong, J.X., Caputo, V., Phelps, I.G., Stella, L., Worgan, L., Dempsey, J.C., Nguyen, A.,  
1347 Leuzzi, V., Webster, R., Pizzuti, A., *et al.* (2016). Recessive Inactivating Mutations in TBCK,

- 1348 Encoding a Rab GTPase-Activating Protein, Cause Severe Infantile Syndromic  
1349 Encephalopathy. *Am J Hum Genet* 98, 772-781.
- 1350 Choudhury, P., Hackert, P., Memet, I., Sloan, K.E., and Bohnsack, M.T. (2019). The human  
1351 RNA helicase DHX37 is required for release of the U3 snoRNP from pre-ribosomal particles.  
1352 *RNA Biol* 16, 54-68.
- 1353 Christoforidis, S., McBride, H.M., Burgoyne, R.D., and Zerial, M. (1999). The Rab5 effector  
1354 EEA1 is a core component of endosome docking. *Nature* 397, 621-625.
- 1355 Cioni, J.M., Koppers, M., and Holt, C.E. (2018). Molecular control of local translation in axon  
1356 development and maintenance. *Curr Opin Neurobiol* 51, 86-94.
- 1357 Cioni, J.M., Lin, J.Q., Holtermann, A.V., Koppers, M., Jakobs, M.A.H., Azizi, A., Turner-  
1358 Bridger, B., Shigeoka, T., Franze, K., Harris, W.A., *et al.* (2019). Late Endosomes Act as  
1359 mRNA Translation Platforms and Sustain Mitochondria in Axons. *Cell* 176, 56-72 e15.
- 1360 Collinet, C., Stoter, M., Bradshaw, C.R., Samusik, N., Rink, J.C., Kenski, D., Habermann, B.,  
1361 Buchholz, F., Henschel, R., Mueller, M.S., *et al.* (2010). Systems survey of endocytosis by  
1362 multiparametric image analysis. *Nature* 464, 243-249.
- 1363 Cox, J., and Mann, M. (2008). MaxQuant enables high peptide identification rates,  
1364 individualized p.p.b.-range mass accuracies and proteome-wide protein quantification. *Nat*  
1365 *Biotechnol* 26, 1367-1372.
- 1366 Das, S., Vera, M., Gandin, V., Singer, R.H., and Tutucci, E. (2021). Intracellular mRNA  
1367 transport and localized translation. *Nat Rev Mol Cell Biol*.
- 1368 Dobin, A., Davis, C.A., Schlesinger, F., Drenkow, J., Zaleski, C., Jha, S., Batut, P., Chaisson,  
1369 M., and Gingeras, T.R. (2013). STAR: ultrafast universal RNA-seq aligner. *Bioinformatics* 29,  
1370 15-21.
- 1371 Dolgalev, I. (2020). msigdb: MSigDB Gene Sets for Multiple Organisms in a Tidy Data  
1372 Format. R package version 721, <https://CRAN.R-project.org/package=msigdb>.
- 1373 Franke, C., Repnik, U., Segeletz, S., Brouilly, N., Kalaidzidis, Y., Verbavatz, J.M., and Zerial,  
1374 M. (2019). Correlative single-molecule localization microscopy and electron tomography  
1375 reveals endosome nanoscale domains. *Traffic* 20, 601-617.
- 1376 Gatto, L., Gibb, S., and Rainer, J. (2021). MSnbase, Efficient and Elegant R-Based Processing  
1377 and Visualization of Raw Mass Spectrometry Data. *J Proteome Res* 20, 1063-1069.
- 1378 Glock, C., Heumuller, M., and Schuman, E.M. (2017). mRNA transport & local translation in  
1379 neurons. *Curr Opin Neurobiol* 45, 169-177.
- 1380 Goto-Silva, L., McShane, M.P., Salinas, S., Kalaidzidis, Y., Schiavo, G., and Zerial, M. (2019).  
1381 Retrograde transport of Akt by a neuronal Rab5-APPL1 endosome. *Sci Rep* 9, 2433.
- 1382 Guerreiro, R.J., Brown, R., Dian, D., de Goede, C., Bras, J., and Mole, S.E. (2016). Mutation  
1383 of TBCK causes a rare recessive developmental disorder. *Neurol Genet* 2, e76.
- 1384 Hancarova, M., Babikyan, D., Bendova, S., Midyan, S., Prchalova, D., Shahsuvaryan, G.,  
1385 Stranecky, V., Sarkisian, T., and Sedlacek, Z. (2019). A novel variant of C12orf4 in a  
1386 consanguineous Armenian family confirms the etiology of autosomal recessive intellectual  
1387 disability type 66 with delineation of the phenotype. *Mol Genet Genomic Med* 7, e865.
- 1388 Higuchi, Y., Ashwin, P., Roger, Y., and Steinberg, G. (2014). Early endosome motility  
1389 spatially organizes polysome distribution. *J Cell Biol* 204, 343-357.

- 1390 Hoang, D.T., Chernomor, O., von Haeseler, A., Minh, B.Q., and Vinh, L.S. (2018). UFBoot2:  
1391 Improving the Ultrafast Bootstrap Approximation. *Mol Biol Evol* 35, 518-522.
- 1392 Huber, W., von Heydebreck, A., Sultmann, H., Poustka, A., and Vingron, M. (2002). Variance  
1393 stabilization applied to microarray data calibration and to the quantification of differential  
1394 expression. *Bioinformatics* 18 Suppl 1, S96-104.
- 1395 Ignatiadis, N., Klaus, B., Zaugg, J.B., and Huber, W. (2016). Data-driven hypothesis weighting  
1396 increases detection power in genome-scale multiple testing. *Nat Methods* 13, 577-580.
- 1397 Jaafar, M., Contreras, J., Dominique, C., Martin-Villanueva, S., Capeyrou, R., Vitali, P.,  
1398 Rodriguez-Galan, O., Velasco, C., Humbert, O., Watkins, N.J., *et al.* (2021). Association of  
1399 snR190 snoRNA chaperone with early pre-60S particles is regulated by the RNA helicase  
1400 Dbp7 in yeast. *Nat Commun* 12, 6153.
- 1401 Jung, H., Gkogkas, C.G., Sonenberg, N., and Holt, C.E. (2014). Remote control of gene  
1402 function by local translation. *Cell* 157, 26-40.
- 1403 Kaech, S., and Banker, G. (2006). Culturing hippocampal neurons. *Nat Protoc* 1, 2406-2415.
- 1404 Kalaidzidis, Y., Kalaidzidis, I., and Zerial, M. (2015). A probabilistic method to quantify the  
1405 colocalization of markers on intracellular vesicular structures visualized by light microscopy.
- 1406 Kassambara, A. (2020). ggpubr: 'ggplot2' Based Publication Ready Plots ([https://cran.r-](https://cran.r-project.org/web/packages/ggpubr/index.html)  
1407 [project.org/web/packages/ggpubr/index.html](https://cran.r-project.org/web/packages/ggpubr/index.html)).
- 1408 Kim, E., and Jung, H. (2020). Local mRNA translation in long-term maintenance of axon  
1409 health and function. *Curr Opin Neurobiol* 63, 15-22.
- 1410 Korotkevich, G., Sukhov, V., Budin, N., Shpak, B., Artyomov, M.N., and Sergushichev, A.  
1411 (2021). Fast gene set enrichment analysis. bioRxiv, 060012.
- 1412 Lauer, J., Segeletz, S., Cezanne, A., Guaitoli, G., Raimondi, F., Gentzel, M., Alva, V., Habeck,  
1413 M., Kalaidzidis, Y., Ueffing, M., *et al.* (2019). Auto-regulation of Rab5 GEF activity in Rabex5  
1414 by allosteric structural changes, catalytic core dynamics and ubiquitin binding. *Elife* 8.
- 1415 Liao, Y.C., Fernandopulle, M.S., Wang, G., Choi, H., Hao, L., Drerup, C.M., Patel, R., Qamar,  
1416 S., Nixon-Abell, J., Shen, Y., *et al.* (2019). RNA Granules Hitchhike on Lysosomes for Long-  
1417 Distance Transport, Using Annexin A11 as a Molecular Tether. *Cell* 179, 147-164 e120.
- 1418 Lippe, R., Miaczynska, M., Rybin, V., Runge, A., and Zerial, M. (2001). Functional synergy  
1419 between Rab5 effector Rabaptin-5 and exchange factor Rabex-5 when physically associated in  
1420 a complex. *Mol Biol Cell* 12, 2219-2228.
- 1421 Loddo, S., Alesi, V., Radio, F.C., Genovese, S., Di Tommaso, S., Calvieri, G., Orlando, V.,  
1422 Bertini, E., Dentici, M.L., Novelli, A., *et al.* (2020). PPP1R21-related syndromic intellectual  
1423 disability: Report of an adult patient and review. *Am J Med Genet A* 182, 3014-3022.
- 1424 Love, M.I., Huber, W., and Anders, S. (2014). Moderated estimation of fold change and  
1425 dispersion for RNA-seq data with DESeq2. *Genome Biol* 15, 550.
- 1426 Martin, K.C., and Ephrussi, A. (2009). mRNA localization: gene expression in the spatial  
1427 dimension. *Cell* 136, 719-730.
- 1428 Memet, I., Doebele, C., Sloan, K.E., and Bohnsack, M.T. (2017). The G-patch protein NF-  
1429 kappaB-repressing factor mediates the recruitment of the exonuclease XRN2 and activation of  
1430 the RNA helicase DHX15 in human ribosome biogenesis. *Nucleic Acids Res* 45, 5359-5374.

- 1431 Murray, D.H., Jahnel, M., Lauer, J., Avellaneda, M.J., Brouilly, N., Cezanne, A., Morales-  
1432 Navarrete, H., Perini, E.D., Ferguson, C., Lupas, A.N., *et al.* (2016). An endosomal tether  
1433 undergoes an entropic collapse to bring vesicles together. *Nature* 537, 107-111.
- 1434 Nguyen, L.T., Schmidt, H.A., von Haeseler, A., and Minh, B.Q. (2015). IQ-TREE: a fast and  
1435 effective stochastic algorithm for estimating maximum-likelihood phylogenies. *Mol Biol Evol*  
1436 32, 268-274.
- 1437 Nielsen, E., Christoforidis, S., Uttenweiler-Joseph, S., Miaczynska, M., Dewitte, F., Wilm, M.,  
1438 Hoflack, B., and Zerial, M. (2000). Rabenosyn-5, a novel Rab5 effector, is complexed with  
1439 hVPS45 and recruited to endosomes through a FYVE finger domain. *J Cell Biol* 151, 601-612.
- 1440 Ortiz-Gonzalez, X.R., Tintos-Hernandez, J.A., Keller, K., Li, X., Foley, A.R., Bharucha-  
1441 Goebel, D.X., Kessler, S.K., Yum, S.W., Crino, P.B., He, M., *et al.* (2018). Homozygous  
1442 boricua TBCK mutation causes neurodegeneration and aberrant autophagy. *Ann Neurol* 83,  
1443 153-165.
- 1444 Pagel, M. (1994). Detecting Correlated Evolution on Phylogenies: A General Method for the  
1445 Comparative Analysis of Discrete Characters. *Proceedings of the Royal Society of London*  
1446 *Series B* 255, 37.
- 1447 Paradis, E., and Schliep, K. (2019). ape 5.0: an environment for modern phylogenetics and  
1448 evolutionary analyses in R. *Bioinformatics* 35, 526-528.
- 1449 Parton, R.G., Simons, K., and Dotti, C.G. (1992). Axonal and dendritic endocytic pathways in  
1450 cultured neurons. *J Cell Biol* 119, 123-137.
- 1451 Pfeffer, S.R. (2013). Rab GTPase regulation of membrane identity. *Curr Opin Cell Biol* 25,  
1452 414-419.
- 1453 Philips, A.K., Pinelli, M., de Bie, C.I., Mustonen, A., Maatta, T., Arts, H.H., Wu, K., Roepman,  
1454 R., Moilanen, J.S., Raza, S., *et al.* (2017). Identification of C12orf4 as a gene for autosomal  
1455 recessive intellectual disability. *Clin Genet* 91, 100-105.
- 1456 Popovic, D., Nijenhuis, W., Kapitein, L.C., and Pelkmans, L. (2020). Co-translational targeting  
1457 of transcripts to endosomes. *bioRxiv*, 2020.2007.2017.208652.
- 1458 Preibisch, S., Saalfeld, S., and Tomancak, P. (2009). Globally optimal stitching of tiled 3D  
1459 microscopic image acquisitions. *Bioinformatics* 25, 1463-1465.
- 1460 Quentin, D., Schuhmacher, J., Klink, B.U., Lauer, J., Shaikh, T., Huis in 't Veld, P.J., Welp,  
1461 L.M., Urlaub, H., Zerial, M., and Raunser, S. (2021). Structure of the human FERRY Rab5  
1462 effector complex. *bioRxiv*, 2021.2006.2021.449265.
- 1463 Rangaraju, V., Tom Dieck, S., and Schuman, E.M. (2017). Local translation in neuronal  
1464 compartments: how local is local? *EMBO Rep* 18, 693-711.
- 1465 Rehman, A.U., Najafi, M., Kambouris, M., Al-Gazali, L., Makrythanasis, P., Rad, A.,  
1466 Maroofian, R., Rajab, A., Stark, Z., Hunter, J.V., *et al.* (2019). Biallelic loss of function variants  
1467 in PPP1R21 cause a neurodevelopmental syndrome with impaired endocytic function. *Hum*  
1468 *Mutat* 40, 267-280.
- 1469 Riechmann, V., and Ephrussi, A. (2001). Axis formation during *Drosophila* oogenesis. *Curr*  
1470 *Opin Genet Dev* 11, 374-383.
- 1471 Ritchie, M.E., Phipson, B., Wu, D., Hu, Y., Law, C.W., Shi, W., and Smyth, G.K. (2015).  
1472 limma powers differential expression analyses for RNA-sequencing and microarray studies.  
1473 *Nucleic Acids Res* 43, e47.



- 1474 Rozewicki, J., Li, S., Amada, K.M., Standley, D.M., and Katoh, K. (2019). MAFFT-DASH:  
1475 integrated protein sequence and structural alignment. *Nucleic Acids Res* *47*, W5-W10.
- 1476 Schieweck, R., Ninkovic, J., and Kiebler, M.A. (2020). RNA-binding proteins balance brain  
1477 function in health and disease. *Physiological Reviews*.
- 1478 Schnatwinkel, C., Christoforidis, S., Lindsay, M.R., Uttenweiler-Joseph, S., Wilm, M., Parton,  
1479 R.G., and Zerial, M. (2004). The Rab5 effector Rabankyrin-5 regulates and coordinates  
1480 different endocytic mechanisms. *PLoS Biol* *2*, E261.
- 1481 Sleister, H.M., and Rao, A.G. (2001). Strategies to generate antibodies capable of  
1482 distinguishing between proteins with >90% amino acid identity. *J Immunol Methods* *252*, 121-  
1483 129.
- 1484 Sloan, K.E., Leisegang, M.S., Doebele, C., Ramirez, A.S., Simm, S., Safferthal, C.,  
1485 Kretschmer, J., Schorge, T., Markoutsas, S., Haag, S., *et al.* (2015). The association of late-  
1486 acting snoRNPs with human pre-ribosomal complexes requires the RNA helicase DDX21.  
1487 *Nucleic Acids Res* *43*, 553-564.
- 1488 Spiegel, A., Bachmann, M., Jurado Jimenez, G., and Sarov, M. (2019). CRISPR/Cas9-based  
1489 knockout pipeline for reverse genetics in mammalian cell culture. *Methods* *164-165*, 49-58.
- 1490 Subramanian, A., Tamayo, P., Mootha, V.K., Mukherjee, S., Ebert, B.L., Gillette, M.A.,  
1491 Paulovich, A., Pomeroy, S.L., Golub, T.R., Lander, E.S., *et al.* (2005). Gene set enrichment  
1492 analysis: a knowledge-based approach for interpreting genome-wide expression profiles. *Proc*  
1493 *Natl Acad Sci U S A* *102*, 15545-15550.
- 1494 Suleiman, J., Al Hashem, A.M., Tabarki, B., Al-Thihli, K., Bi, W., and El-Hattab, A.W. (2018).  
1495 PPP1R21 homozygous null variants associated with developmental delay, muscle weakness,  
1496 distinctive facial features, and brain abnormalities. *Clin Genet* *94*, 351-355.
- 1497 Tabari, E., and Su, Z. (2017). PorthoMCL: Parallel orthology prediction using MCL for the  
1498 realm of massive genome availability. *Big Data Anal* *2*.
- 1499 Team, R.C. (2019). R: A language and environment for statistical computing. R Foundation  
1500 for Statistical Computing.
- 1501 Turner-Bridger, B., Caterino, C., and Cioni, J.M. (2020). Molecular mechanisms behind  
1502 mRNA localization in axons. *Open Biol* *10*, 200177.
- 1503 UniProt, C. (2019). UniProt: a worldwide hub of protein knowledge. *Nucleic Acids Res* *47*,  
1504 D506-D515.
- 1505 Wandinger-Ness, A., and Zerial, M. (2014). Rab proteins and the compartmentalization of the  
1506 endosomal system. *Cold Spring Harb Perspect Biol* *6*, a022616.
- 1507 Whelan, S., and Goldman, N. (2001). A general empirical model of protein evolution derived  
1508 from multiple protein families using a maximum-likelihood approach. *Mol Biol Evol* *18*, 691-  
1509 699.
- 1510 Wickham, H. (2016). *ggplot2: Elegant Graphics for Data Analysis* (Springer-Verlag New  
1511 York).
- 1512 Wilson, J.M., de Hoop, M., Zorzi, N., Toh, B.H., Dotti, C.G., and Parton, R.G. (2000). EEA1,  
1513 a tethering protein of the early sorting endosome, shows a polarized distribution in  
1514 hippocampal neurons, epithelial cells, and fibroblasts. *Mol Biol Cell* *11*, 2657-2671.

- 1515 Yates, A.D., Achuthan, P., Akanni, W., Allen, J., Allen, J., Alvarez-Jarreta, J., Amode, M.R.,  
1516 Armean, I.M., Azov, A.G., Bennett, R., *et al.* (2020). Ensembl 2020. *Nucleic Acids Res* *48*,  
1517 D682-D688.
- 1518 Young, G., Hundt, N., Cole, D., Fineberg, A., Andrecka, J., Tyler, A., Olerinyova, A., Ansari,  
1519 A., Marklund, E.G., Collier, M.P., *et al.* (2018). Quantitative mass imaging of single biological  
1520 macromolecules. *Science* *360*, 423-427.
- 1521 Yu, G., Lam, T.T., Zhu, H., and Guan, Y. (2018). Two Methods for Mapping and Visualizing  
1522 Associated Data on Phylogeny Using Ggtree. *Mol Biol Evol* *35*, 3041-3043.
- 1523 Yu, G., Smith, D.K., Zhu, H., Guan, Y., and Lam, T.T.-Y. (2017). ggtree: an r package for  
1524 visualization and annotation of phylogenetic trees with their covariates and other associated  
1525 data. *Methods in Ecology and Evolution* *8*, 28-36.
- 1526 Zapata-Aldana, E., Kim, D.D., Remtulla, S., Prasad, C., Nguyen, C.T., and Campbell, C.  
1527 (2019). Further delineation of TBCK - Infantile hypotonia with psychomotor retardation and  
1528 characteristic facies type 3. *Eur J Med Genet* *62*, 273-277.
- 1529 Zhang, X., Smits, A.H., van Tilburg, G.B., Ovaa, H., Huber, W., and Vermeulen, M. (2018).  
1530 Proteome-wide identification of ubiquitin interactions using UbIA-MS. *Nat Protoc* *13*, 530-  
1531 550.
- 1532
