# The novel Rab5 effector FERRY links early endosomes with the translation machinery

J. S. Schuhmacher<sup>1</sup>, S. tom Dieck<sup>2</sup>, S. Christoforidis<sup>3,4</sup>, C. Landerer<sup>1</sup>, L. Hersemann<sup>1</sup>, S. Seifert<sup>1</sup>, A. Giner<sup>1</sup>, A. Toth-Petroczy<sup>1</sup>, Y. Kalaidzidis<sup>1,5</sup>, E. M. Schuman<sup>2</sup>, M. Zerial<sup>1\*</sup>.

<sup>1</sup>Max Planck Institute of Molecular Cell Biology and Genetics, Pfotenhauerstrasse 108, 01307, Dresden, Germany.

<sup>2</sup>Max Planck Institute for Brain Research, Max-von-Laue-Str. 4, 60438 Frankfurt am Main, Germany.

<sup>3</sup>Institute of Molecular Biology and Biotechnology-Biomedical Research, Foundation for Research and Technology, 45110 Ioannina, Greece.

<sup>4</sup>Laboratory of Biological Chemistry, Department of Medicine, School of Health Sciences, University of Ioannina, 45110 Ioannina, Greece.

<sup>5</sup>Faculty of Bioengineering and Bioinformatics, Moscow State University, Moscow, Russia.

\*Correspondence: zerial@mpi-cbg.de

## Abstract

Local translation is vital to polarized cells such as neurons and requires a precise and robust distribution of different mRNAs and the translation machinery across the entire cell. The underlying mechanisms are poorly understood and important players are still to be identified. Here, we discovered a novel Rab5 effector complex which leads to mental retardation when genetically disrupted. The Five-subunit Endosomal Rab5 and RNA/ribosome intermediarY, FERRY complex localizes to early endosomes and associates with the translation machinery and a subset of mRNAs including mRNAs for mitochondrial proteins. It directly interacts with mRNA, thereby exhibiting different binding efficacies. Deletion of FERRY subunits reduces the endosomal localization of transcripts, indicating a role in mRNA distribution. Accordingly, FERRY-positive early endosomes harboring mRNA encoding mitochondrial proteins were observed in close proximity to mitochondria in neurons. Therefore, the FERRY complex plays a role for mRNA localization by linking early endosomes with the translation machinery.

## 33 Introduction

34 Subcellular mRNA localization is a widespread phenomenon in biology. The correct  
35 positioning of mRNA transcripts is vital for fundamental biological processes comprising  
36 embryonic development, cellular homeostasis, neuronal plasticity and adaptive response to  
37 environmental cues (reviewed in: (Cioni et al., 2018; Das et al., 2021; Glock et al., 2017; Martin  
38 and Ephrussi, 2009; Turner-Bridger et al., 2020)). A prime example is the asymmetric  
39 localization of specific mRNAs during oogenesis that determines the body axes and patterns  
40 of the future embryo (reviewed in: (Becalska and Gavis, 2009; Riechmann and Ephrussi,  
41 2001)). While the oocyte represents a morphologically rather simple example, a completely  
42 different scenario unfolds in the brain, where neurons are spanning long distances with their  
43 axonal and dendritic processes. Not only are these compartments highly specialized in their  
44 function but they also respond to external cues on a millisecond timescale at the distal end of  
45 their network, far away from the cell body. Neurons handle these challenges by producing  
46 many proteins locally at their site of action, in a process called local translation, which is  
47 involved in axon outgrowth, branching synaptogenesis, regeneration and neuronal plasticity  
48 (Cioni et al., 2018; Jung et al., 2014; Kim and Jung, 2020; Rangaraju et al., 2017). This however  
49 requires the availability of the respective mRNAs at the sites of local translation, and hence the  
50 precise subcellular localization of a plethora of mRNAs (Glock et al., 2017; Turner-Bridger et  
51 al., 2020).

52 Transcriptomic studies have identified thousands of different mRNAs in neuronal sub-  
53 compartments, such as axons, dendrites or the neuropil (Andreassi et al., 2010; Briese et al.,  
54 2016; Cajigas et al., 2012). Furthermore, these transcripts are distributed heterogeneously, with  
55 mRNAs showing distinct localization patterns, for example, being restricted to axons or  
56 dendrites or even smaller sub-compartments. While mRNAs with synaptic function are  
57 enriched in the somatodendritic region, in axons mRNAs for proteins connected to translation,  
58 the cytoskeleton as well as mitochondrial proteins are significantly enriched compared to the  
59 somatodendritic region (Andreassi et al., 2010; Briese et al., 2016). These findings reveal a  
60 complex mRNA distribution plan, where thousands of mRNAs have to find their correct  
61 location.

62 Such a complex task requires active mRNA transport along the cytoskeleton. A direct  
63 connection between RNA binding proteins (RBPs) and motors proteins has been observed in  
64 various forms, for example the targeting of mRNAs by RBPs which recognize *cis*-regulatory  
65 elements on the respective mRNA, including the so called ‘zipcoes’ (reviewed in: (Buxbaum  
66 et al., 2015; Das et al., 2021)). Recently, different compartments of the endolysosomal system  
67 have been associated in situ with the spatial organization of components of the translation  
68 machinery, including mRNA, mRNP granules as well as ribosomes (Cioni et al., 2019; Higuchi  
69 et al., 2014; Liao et al., 2019). In general, the endolysosomal system is the central logistic  
70 system of eukaryotic cells, comprising multiple membrane-enclosed organelles, such as early  
71 and late endosomes as well as the lysosome, is responsible for the trafficking and sorting of a

72 large variety of cargos, including membrane receptors, lipids, extracellular fluids and signaling  
73 proteins. Within this network, the early endosome is the first station for cargo coming from the  
74 plasma membrane, that is subsequently sorted either into the recycling pathway via recycling  
75 endosomes, or into the degradation pathway, via late endosomes, multivesicular bodies and the  
76 lysosomes. The identity of endosomes is determined by an intricate interplay between their  
77 unique protein residents and specific lipids which are intimately linked to Rab GTPases  
78 (Cezanne et al., 2020; Pfeffer, 2013). Along the endosomal pathway, different Rab GTPases  
79 characterize different organelles, such as Rab4 and Rab11 for recycling endosomes and Rab7  
80 for late endosomes (reviewed in: (Wandinger-Ness and Zerial, 2014)). Rab5 is the hallmark  
81 GTPase of the early endosome and a molecular switch with two distinct states, a GDP bound  
82 or nucleotide free, inactive or a GTP loaded, active state. On the early endosome Rab5 gets  
83 activated by a Guanosine exchange factor (GEF) and is then able to recruit a plethora of Rab5  
84 effector proteins, such as the molecular tether EEA1 or Rabankyrin-5, thereby not only  
85 regulating the lipid content of the early endosome, but also orchestrating different  
86 functionalities of the organelle, by forming distinct domains on the membrane (Cezanne et al.,  
87 2020; Franke et al., 2019; Lauer et al., 2019; Lippe et al., 2001; Murray et al., 2016;  
88 Schnatwinkel et al., 2004; Zhang et al., 2012).

89 As a well-established multifunctional transport system, the endosomal system is ideally suited  
90 to regulate mRNA localization, especially in morphologically complex compartments like the  
91 hyphae of fungi or the processes of neurons. In the fungus *U. maydis*, a special adaptor system  
92 enables the long-distance travel of mRNA and polysomes on early endosomes (Higuchi et al.,  
93 2014). In higher eukaryotes lysosomes and late endosomes are involved in RNA transport.  
94 While lysosomes serve as an Annexin A11-mediated mRNP granule transport vehicle, late  
95 endosomes were identified as translation platforms for mitochondrial proteins in neurons  
96 (Cioni et al., 2019; Liao et al., 2019). A recent study showed the co-localization of mRNA with  
97 early endosomes, indicating that also early endosomes might be part of an mRNA distribution  
98 machinery (Popovic et al., 2020). While late endosomal motility is primarily retrograde, early  
99 endosomes show bidirectional motility in neurons (Goto-Silva et al., 2019). Therefore, early  
100 endosomes appear more suitable to support directional mRNA transport than late endosomes.  
101 However, a molecular mechanism describing the connection between early endosomes and  
102 mRNA or the entire translation machinery is still missing. To date, none of the mRNA-  
103 associated proteins appears to localize on early endosomes nor do any endosomal proteins have  
104 RNA binding motifs. The identification of a molecular connection between early endosomes  
105 and the translation machinery is especially crucial as it sets the basis for addressing the  
106 questions about the transcript specificity of mRNA localization and the distribution to the  
107 correct location. Considering the large number of transcripts that need to be precisely localized,  
108 one would envision a molecular machinery that transports specific mRNA subsets,  
109 discriminates between different mRNAs and thereby using a limited number of vesicular  
110 carriers.

111 Closing this gap, we report the discovery of a novel five-subunit Rab5 effector complex, which  
112 we named Five-subunit Endosomal Rab5 and RNA/ribosome intermediarY (FERRY)  
113 complex. Through direct interaction with Rab5 and mRNA, it connects the early endosome  
114 with the translation machinery. Furthermore, the FERRY complex is able to bind specific  
115 transcripts with high efficacy including mRNAs of mitochondrial proteins for fundamental  
116 processes, such as the respiratory chain, the TCA cycle and the mitochondrial protein synthesis.

117

## 118 **Results**

### 119 **Identification of a novel Rab5 effector complex**

120 In previous studies we isolated the complete set of Rab5 effectors from bovine brain cytosol,  
121 using a Rab5 affinity chromatography (Christoforidis et al., 1999). Upon further purification  
122 of this intricate set of proteins, we were surprised to observe that as many as five proteins co-  
123 fractionated in size exclusion chromatography, in fractions 22 to 25 (Figure 1A, left panel). To  
124 purify further these effectors, the above fractions were pooled and subjected to anion exchange  
125 chromatography, which, in comparison to size exclusion chromatography, separates proteins  
126 on a different principle (*i.e.* based on ionic charges). Interestingly, the same set of five proteins  
127 co-eluted from the anion exchange column in fractions 41 to 43 (Figure 1A, right panel). The  
128 co-fractionation of these proteins, both in size exclusion and anion exchange chromatography,  
129 indicated that they exist in a complex, which raised a great interest regarding its identity and  
130 function. Mass spectrometry revealed the five proteins as Tbck (101 kDa), Ppp1r21 (88 kDa),  
131 C12orf4 (64 kDa), Cryz11 (39 kDa) and Gatd1 (23 kDa) (Figure 1B). For 3 of the 5 proteins  
132 human gene mutations have been reported (Beck-Wodl et al., 2018; Bhoj et al., 2016; Chong  
133 et al., 2016; Guerreiro et al., 2016; Hancarova et al., 2019; Loddo et al., 2020; Ortiz-Gonzalez  
134 et al., 2018; Philips et al., 2017; Rehman et al., 2019; Suleiman et al., 2018; Zapata-Aldana et  
135 al., 2019). For clarity, we will refer to the novel complex as the Five-subunit Endosomal Rab5  
136 and RNA/ribosome intermediarY (FERRY) complex, with the individual subunits being  
137 designated Fy-1 – Fy-5 (Figure 1B).

138 To show that the five co-fractionating proteins form a complex, we co-expressed Fy-1 – Fy-3  
139 in baculovirus-infected insect cells and incubated the lysate with individually purified Fy-4 and  
140 Fy-5 to reconstitute the FERRY complex *in vitro* (see Methods: Protein purification).  
141 Figure 1C shows that we obtained a stable complex comprising all five proteins eluting as a  
142 monodisperse peak from SEC. In order to estimate the stoichiometry of the components in the  
143 FERRY complex, we compared the intensity of the corresponding signals of a Coomassie  
144 stained SDS PAGE, which suggested a ratio of 1:2:1:2:4 for Fy-1:Fy-2:Fy-3:Fy-4:Fy-5,  
145 respectively. Using mass photometry, we obtained a molecular weight of  $525 \pm 41$  kDa for the  
146 fully assembled complex which fits very well with the estimated ratios and a calculated  
147 molecular weight of 521 kDa. This was further corroborated by a cryoEM structure which  
148 showed a ratio of 2:2:4 for Fy-2, Fy-4 and Fy-5 (Quentin et al., 2021). With the FERRY

149 complex in hand, we tested whether it fulfills the typical criterion of Rab5 effectors and binds  
150 predominantly to the activated, GTP-loaded Rab5, by performing a Glutathione-S-transferase  
151 (GST) pulldown assay. The FERRY complex bound much stronger to Rab5:GTP than  
152 Rab5:GDP, while no interaction was observed with GST, (Figure 1D).

153 We next validated our findings and examined the specificity of the Rab GTPase interaction.  
154 We *in vitro* translated Fy-1 to Fy-5 incorporating <sup>35</sup>S methionine and performed *in vitro* binding  
155 assays against different Rab GTPases of the endosomal system, including Rab5, Rab4 and  
156 Rab11 (recycling endosome) and Rab7 (late endosome) (Figure 1E). In this experimental set  
157 up, the binding of each component of the complex was tested individually, in the absence of  
158 the other subunits, thereby allowing identification of the subunit(s) of the complex that mediate  
159 binding between the FERRY complex and Rab5. Out of the five subunits, only Fy-2 bound to  
160 Rab5:GTP, but not Rab5:GDP (Figure 1E). These results indicate that Fy-2 mediates the  
161 interaction between the FERRY complex and Rab5:GTP. This was also confirmed by hydrogen  
162 deuterium exchange mass spectrometry (HDX-MS), which identified the Rab5 binding site of  
163 the FERRY complex near the C-terminus of Fy-2 (Quentin et al., 2021). In addition, no  
164 interaction was observed between the FERRY complex and the other Rab GTPases, neither in  
165 the GDP- nor GTP-bound form. These results indicate that the FERRY complex is indeed a  
166 Rab5 effector complex and very likely localizes on Rab5-positive and thus early endosomes.  
167 To validate this prediction, we raised an antibody against Fy-2 which is suitable for  
168 immunofluorescence (Figure S1, see also Methods: Antibody validation). The fluorescence  
169 signal revealed a punctate localization pattern in HeLa cells, that matches the localization of  
170 the early endosomal marker EEA1 (Figure 1F). This finding shows that the FERRY complex  
171 localizes to early endosomes.

172 The properties of the five FERRY subunits exhibit a substantial variability in size, domain  
173 composition and structural features. Indeed, the FERRY complex does not resemble any known  
174 endosomal complexes (*e.g.* HOPS, CORVET, or the ESCRT complexes) (Figure 1B).  
175 Searching for traces of the FERRY complex in the course of evolution, we performed a  
176 phylogenetic analysis of the subunits of the FERRY complex. While Fy-1 is the most ancestral  
177 subunit with homologues in some fungi, we also found an assembly of Fy-1, Fy-3 and a shorter  
178 version of Fy-2 in insects and some nematodes, that lacks the Fy-4 and the Fy-5 binding sites  
179 that were mapped based on structural information (Quentin et al., 2021). With the evolution of  
180 the Chordata, we observed a transition from the reduced 3 component assembly to the five-  
181 subunit complex, via the co-occurrence of two novel proteins, Fy-4 and Fy-5 and the extension  
182 of Fy-2 with the Fy-4 and Fy-5 binding sites (Figure 1G and Figure S2). This co-evolution  
183 further supports that the FERRY subunits form a stable protein complex that is evolutionary  
184 conserved.

185

## 186 **The FERRY complex associates with the translation machinery**

187 Even though the FERRY complex has not previously been identified, it may play an important  
188 role in brain function. Clinical studies on patients, with a mutation in the *fy-1* (*tbck*) or *fy-2*  
189 (*ppp1r21*) gene, show that loss of either of these proteins severely impairs brain development  
190 and function, causing symptoms such as a mental retardation, intellectual disability, hypotonia,  
191 epilepsy, and dysmorphic facial features resulting in a premature death of the patients (Bhoj et  
192 al., 2016; Chong et al., 2016; Guerreiro et al., 2016; Hancarova et al., 2019; Loddo et al., 2020;  
193 Ortiz-Gonzalez et al., 2018; Philips et al., 2017; Suleiman et al., 2018; Zapata-Aldana et al.,  
194 2019). Different studies report the accumulation of lipofuscin the human brain and further  
195 indicate disturbances in the endocytic system (Beck-Wodl et al., 2018; Rehman et al., 2019).  
196 These results suggest that FERRY complex carries out an endocytic function which is essential  
197 for brain development and neuronal function.

198 To get insights into the cellular role of the FERRY complex, we examined the interaction  
199 network of the novel complex using a GST pulldown approach (Figure 2A). In a first step, we  
200 generated a GST fusion variant of the FERRY complex (GST-FERRY). As observed for the  
201 native complex, GST-FERRY eluted from SEC as a monodispersed peak yielding pure  
202 complex (Figure 2B). Subsequently, GST-FERRY was immobilized on resin, incubated with  
203 fresh HEK 293 cell detergent lysate (see Methods: HEK 293 lysate preparation), stringently  
204 washed and eluted from the resin (Figure 2A). Mass spectrometry of the elution fractions  
205 revealed 34 proteins as potential interaction partners of the FERRY complex (Figure 2C,  
206 Table S1). Almost Three-quarters of the candidates (73.5 %) represent ribosomal proteins of  
207 the both the large and the small subunit (Figure 2D), which suggests that complete ribosomes  
208 and hence the translation machinery were pulled down by the FERRY complex. These results  
209 provide evidence that the FERRY complex may associate with ribosomes, and thereby link the  
210 translation machinery with the endosomal system. However, ribosomal and mitochondrial  
211 proteins could also be considered contaminants in our biochemical assay.

212 To test for the specificity of the above interactions we asked whether RNAs accompany the  
213 ribosomes and RNA-binding proteins as FERRY interactors. To identify transcripts co-eluting  
214 with the FERRY complex, we modified the protocol of the GST-FERRY pulldown assay to  
215 obtain RNA, instead of proteins, which was subsequently analyzed by sequencing (Figure 2A).  
216 The RNA sequencing reads were then mapped against the human genome identifying more  
217 than 17 000 different mRNAs. A comparison of the FERRY complex with a GST control,  
218 applying a stringent cut-off (adjusted p-value < 0.01), provided 252 mRNAs significantly  
219 associated with the FERRY complex (Figure 2E, Table S1). Among these candidates, the  
220 largest group of mRNAs (66 transcripts/ 26.2 %) constitute nuclear-encoded mitochondrial  
221 proteins (Figure 2F). Furthermore, we also identified 13 components (5.2 %) of the endosomal  
222 system, for example *vps8* mRNA. As part of this group, we also identified *fy-1* and *fy-3* mRNA,  
223 which might suggest that the FERRY complex can associate with mRNAs of its subunits. A  
224 third group of transcripts was classified as nucleosome components (22 transcripts/ 8.7 %).

225 Even though we used the lysate of HEK 293 cells, we found transcripts (12/ 4.8 %) that are  
226 either enriched (*e.g. begain* mRNA) (Deguchi et al., 1998) or play an important role in the  
227 brain (*e.g. pafah1b3* mRNA) (Nothwang et al., 2001). To further characterize the mRNA  
228 candidates, we performed an enrichment analysis against a gene set collection (MSigDB C5  
229 collection: ontology gene sets). Among others, various gene sets connected to mitochondria  
230 were significantly enriched (adjusted p-value < 0.01), including mitochondrial matrix genes  
231 (gene set #1714), genes connected to the mitochondrial ribosome (gene set #2354), to cellular  
232 respiration (gene set #480) as well as to the tricarboxylic acid cycle (gene set #4413). In  
233 summary, these results suggest that the FERRY complex interacts with specific mRNAs,  
234 especially those encoding mitochondrial proteins. The molecular nature of the interaction  
235 between the FERRY complex and the translation machinery however, cannot be derived solely  
236 from such an assay.

237

### 238 **The FERRY complex interacts directly and selectively with mRNA**

239 If mRNA is a critical link between the FERRY complex and the mitochondrial translation  
240 machinery, then we should demonstrate that the FERRY complex binds directly to specific  
241 mRNAs. To test this hypothesis, we performed an electrophoretic mobility shift assay (EMSA)  
242 with *in vitro* transcribed mRNAs and the FERRY complex. We chose *mrpl41* a top candidate  
243 of the RNA screen and included the 5' UTR, the coding region, the 3' UTR and a short stretch  
244 of 50 adenines, yielding a 660-nucleotide, artificially poly-adenylated mRNA. With increasing  
245 amounts of FERRY complex an additional signal at a higher molecular weight appeared in the  
246 EMSA, indicating a direct interaction between the FERRY complex and *mrpl41* mRNA  
247 (Figure 3A).

248 We next tested whether the RNA binding to the FERRY complex is Rab5-dependent. We  
249 performed the EMSA with a fixed FERRY/RNA ratio and added increasing amounts of  
250 Rab5:GTP $\gamma$ S to the assay. This did not have a visible effect on the FERRY-RNA interaction  
251 (Figure 3B). We further tested whether individual FERRY subunits are sufficient to bind  
252 mRNA or if the full FERRY complex is required. To do so, we compared the FERRY complex  
253 with its subunits Fy-4 and Fy-5, in the ratios that were observed in the CryoEM structure  
254 (Quentin et al., 2021). However, the results showed that neither of the two small subunits is  
255 able to interact with *mrpl41* (Figure S3).

256 The enrichment of specific groups of mRNAs in the RNA screen point towards the ability of  
257 the FERRY complex to discriminate between different mRNAs. To examine the specificity of  
258 mRNA binding we chose 8 mRNAs out (of the 252 found in the screen) comprising different  
259 mitochondrial functionalities, such as the respiratory chain (*cox6b* and *cox8a*), the ATP  
260 Synthase (*atp5f1b*), the mitochondrial stress response (*gstp1* and *prdx5*), the mitochondrial  
261 ribosome (*mrpl41*), the TCA cycle (*mdh2*) and the mitochondrial ubiquitination machinery  
262 (*uchl1*), and tested the direct interaction with the FERRY complex using an EMSA. While

263 *mrpl41*, *mdh2* and *atp5f1b* exhibited a strong interaction with the FERRY complex, the  
264 interaction with the other five candidates was much weaker (Figure 3C). These results  
265 demonstrate that the FERRY complex binds transcripts with different efficacy *in vitro*.

266

## 267 **The FERRY complex influences mRNA localization in HeLa cells**

268 The biochemical data suggest that FERRY mediates the association of mRNA or the translation  
269 machinery with early endosomes. To test this prediction, we designed an experiment to  
270 compare the localization of early endosomes (marked by EEA1), the FERRY complex (Fy-2)  
271 and different mRNAs, (*i.e.* *mrpl41*, *mdh2* and *atp5f1b*) upon knock-out of different FERRY  
272 subunits in HeLa cells (Figure 4A). The mRNA candidates that show a clear interaction with  
273 the FERRY complex *in vitro* binding assay were chosen. Furthermore, the mRNA candidates  
274 also represent different important mitochondrial pathways or functionalities, such as the  
275 mitochondrial ribosome (*mrpl41*), the TCA cycle (*mdh2*) and the respiratory chain (*atp5f1b*).  
276 In this assay, mRNA localization was determined by single molecule fluorescence *in situ*  
277 hybridization (smFISH). In a second step, using the CRISPR/Cas9 technology, we generated  
278 *fy-2*, *fy-4* and *fy-5* knock-out HeLa cell lines and confirmed the loss of the respective protein  
279 by Western blot (Figure S4). Immunostaining of Fy-2 in the *fy-2* knock-out cell line showed a  
280 strong reduction but no complete loss of fluorescent signal (Figure S1). Since the knock-out  
281 cell lines were generated by indel formations (see Methods: Generation of Generation of HeLa  
282 knockout (KO) cell lines), the remaining signal might either be caused by residual Fy-2 protein  
283 in the cells or by the recognition of an additional protein by the antibody. To avoid  
284 misinterpretations, we excluded the *fy-2* KO cell line from the experiment and used the signal  
285 from the antibody against EEA1 for image analysis and quantification (also see Methods:  
286 Antibody validation).

287 Using automated microscopy, we acquired images visualizing Fy-2, EEA1 and the mRNA  
288 candidates in HeLa wildtype and the *fy-5* and *fy-4* KO cell lines. As seen before, we observed  
289 a strong co-localization between EEA1 and the Fy-2 in the wildtype, but also in the KO cell  
290 lines (Figure 4B, Figure S5A, B). This indicates that the co-localization of Fy-2 and EEA1,  
291 does not require Fy-4 or Fy-5. In wildtype HeLa cells we observed 10.2 %, 7.1 % and 10.1 %  
292 co-localization of mRNA and EEA1 positive early endosomes for *mdh2*, *atp5f1b* and *mrpl41*,  
293 respectively. We often additionally observe the presence of fluorescence signal for Fy-2 at  
294 these co-localization events (Figure 4B boxes, Figure S5A, B boxes). While the loss of Fy-4  
295 had no measurable effect on the co-localization of the mRNAs with early endosomes, a  
296 significant decrease in co-localization was observed upon knock-out of *fy-5* (Figure 4C-F). The  
297 loss of Fy-5 caused a decrease in co-localization of 27 %, 25 % and 20 % for *atp5f1b*, *mdh2*  
298 and *mrpl41* mRNAs, respectively (Figure 4F). This clearly indicates that Fy-5 but not Fy-4  
299 affects the ability of the FERRY complex to interact with mRNA. This is in agreement with  
300 biochemical and structural data, showing that Fy-5 is an integral part of one of the interaction  
301 sites of the FERRY complex with *mrpl41* mRNA. The fact that the interaction of the FERRY



302 complex with mRNA comprises two main interfaces, involving Fy-1, Fy-2 and Fy-5, may  
303 explain why a loss of Fy-5 decreases mRNA early endosome co-localization but does not  
304 abolish it (Quentin et al., 2021). The observation that a loss of Fy-4 does not affect mRNA-  
305 early endosome co-localization might be explained by its location right at the center of the core  
306 particle of the FERRY complex embraced by a Fy-2 dimer. Cross-linking experiments also  
307 showed that Fy-4 is not directly involved in mRNA binding (Quentin et al., 2021).

308 In summary, we found that the FERRY complex contributes to the localization of specific  
309 mRNAs encoding mitochondrial proteins to early endosomes. The FERRY-mediated  
310 connection between the endosomal system and the translation machinery, might generate an  
311 mRNA transport platform, that seems to be crucial for morphologically complex cell types.

312

### 313 **The FERRY complex localizes to axons as well as to the somatodendritic region**

314 With their long processes, neurons are a prime example of morphologically complex cells.  
315 Furthermore, the genetic loss of certain FERRY subunits has major impact on brain  
316 development and function. Therefore, we assessed the localization of the FERRY complex in  
317 primary rat hippocampal neurons. To determine its distribution, we compared the FERRY  
318 localization to the endosomal markers EEA1 and Rabankyrin-5. EEA1 and Rabankyrin-5 differ  
319 in their localization in neurons, since EEA1 is restricted to the somatodendritic region (Wilson  
320 et al., 2000), while Rabankyrin-5 is also found in axons (Goto-Silva et al., 2019).  
321 Immunofluorescence staining of Fy-2 revealed a punctate pattern of fluorescent foci dispersed  
322 across the neuron (Figure 5A, overview), as also observed in HeLa cells (Figure 1F). Indeed,  
323 the fluorescent signal strongly co-localized with the endosomal markers EEA1 and  
324 Rabankyrin-5. We observed many triple positive (Fy-2, EEA1, Rabankyrin-5) endosomes  
325 (Figure 5A, details, white arrowheads), but also fluorescent foci that were only positive for Fy-  
326 2 and Rabankyrin-5, mainly in thin structures, where EEA1 signal was absent (Figure 5A, blue,  
327 yellow arrowheads). These results suggest that the FERRY complex is present in both the  
328 somatodendritic region as well as axons.

329 In order to validate this hypothesis, we performed immunofluorescence against Map2 and the  
330 phosphorylated neurofilament-1 (pNF) as markers of the somatodendritic region and axons,  
331 respectively (Figure 5B, overview). As our previous experiments suggested, we again observed  
332 Fy-2 and Rabankyrin-5 positive early endosomes in thin structures positive for the axonal  
333 marker pNF (Figure 5B, box). In summary, the FERRY complex resides on early endosomes,  
334 distributed across the neuronal soma, dendrites and axons, immediately raising the question  
335 about possible mRNA localization on these endosomes.

336

### 337 **The FERRY complex co-localizes with mRNA on early endosomes in neurons**

338 In order to address the question about the RNA load of FERRY positive endosomes in neurons,  
339 we again combined immunofluorescence with smFISH. To visualize total mRNA distribution  
340 in the cell, we used an *in-situ* hybridization probe directed against the polyA tail of RNA. We  
341 focused our imaging on dendrites and axons of the neuron excluding the soma, since the cell  
342 body has a high protein and mRNA density which may impede quantification. Furthermore,  
343 we were especially interested in the distribution of mRNA in distal regions. While the mRNA  
344 density in major dendrites is still high, it decreases in thinner processes and forms clusters at  
345 nodes. Overall, we observed that 6.1 % of mRNA foci co-localize with the FERRY complex  
346 (Figure 5C). Often, these events also co-localize with EEA1, suggesting that mRNA is located  
347 on early endosomes (Figure 5C, light blue box). In other cases, a larger endosome is surrounded  
348 by several mRNA foci, with the fluorescent signals being in close proximity rather than co-  
349 localizing (Figure 5C, white box). Taking into account the molecular dimensions of the  
350 FERRY complex, mRNAs and the labelling methods we used, we estimated that the  
351 fluorescent signals of the FERRY complex and the mRNA can have a distance of around  
352 250 nm or more and still represent a mRNA-FERRY complex (Figure S6). Our findings  
353 corroborate the notion that early endosomes are active players in the organization and transport  
354 of mRNAs in neurons.

355 We next tested the co-localization of the FERRY complex with specific transcripts in neurons  
356 choosing *mdh2* and *uchl1* mRNA based on the initial mRNA binding screen (Figure 2E) and  
357 the Fy-5-dependent co-localization with early endosomes of *mdh2* (Figure 4F). Compared to  
358 the fluorescent signal of the entire mRNA population, the signal for individual mRNAs was  
359 weak and we observed only scarce co-localization with the FERRY complex. More often the  
360 fluorescent signals were in close proximity, rather than overlapping (Figure 5C-E). Given the  
361 methodological circumstances (Figure S6), we assumed that fluorescence signals of FERRY  
362 and mRNA within a range of 250 nm still represent a FERRY-mRNA complex (Figure 5D, E  
363 boxes). Counting the number of events, we found 13.2 % of *mdh2* transcripts and 10.3 % of  
364 *uchl1* mRNAs in contact with the FERRY complex. A proper quantification is impeded by a  
365 substantial variability between cells and a different transcript density in the neurons.

366 The interaction between the FERRY complex and different transcripts encoding mitochondrial  
367 proteins suggests that FERRY-positive early endosomes loaded with mRNA destined for  
368 mitochondria might be observed on mitochondria. To examine this, we additionally stained  
369 neurons with TOMM70 as a marker for mitochondria. When visualizing the entire mRNA  
370 population, we regularly found co-localization of the FERRY complex with mRNA on  
371 mitochondria (Figure 6A). Since mRNA and mitochondria are quite abundant in neurons, it is  
372 difficult to estimate how specific this co-localization is. Therefore, we also assessed the co-  
373 localization of the FERRY complex with *mdh2* mRNA and mitochondria (Figure 6B). Even  
374 though these events were infrequent, we indeed observed examples where the fluorescence  
375 signal of the FERRY complex, *mdh2* mRNA and mitochondria were in close proximity

376 (Figure 6B, blue box) or even co-localizing (Figure 6B, grey box). These findings support the  
377 notion that the FERRY complex is involved in the localization and the distribution of specific  
378 mRNAs such as transcripts encoding for mitochondrial proteins (e. g. *mdh2* mRNA), most  
379 probably through mediating their endosomal transport (Figure 6C).

380

## 381 **Discussion**

### 382 **A novel link between the endosomal system and the translation machinery**

383 In this study we identify and characterize a novel Rab5 effector complex, named the FERRY  
384 complex, which is composed of five subunits, named Fy-1 to Fy-5. It is able to bind activated  
385 Rab5 on early endosomes, while it simultaneously associates with ribosomes and mRNA  
386 through direct interaction with mRNA (Figure 6C). Thereby, we discovered a new link between  
387 early endosomes and the translation machinery in higher eukaryotes, providing molecular  
388 insights into the molecular mechanisms regulating the association of mRNA with endosomes.  
389 Furthermore, a screen for FERRY-associated mRNAs revealed a strong enrichment for specific  
390 groups of transcripts (e.g. mRNA for mitochondrial proteins), already indicating that the  
391 FERRY complex can selectively bind to RNA (Figure 6C). This selectivity seems to originate  
392 from its ability to exhibit a different binding mode for different transcripts, through a composite  
393 binding interface comprising several subunits (Quentin et al., 2021). These features allow the  
394 FERRY complex to transform the early endosome into a transport vehicle for mRNA  
395 distribution. Unlike EGF or transferrin, which reside inside the endosome, the RNA is  
396 transported on the outside.

### 397 **Specificity in mRNA distribution in neurons**

398 Local translation in neurons requires active transport of thousands of mRNAs over long  
399 distances to the far processes of axons or dendrites (Das et al., 2021). It is impossible that every  
400 transcript has a specialized transport vehicle, raising the question as to how mRNA distribution  
401 is organized and how many different vehicles are involved in this process. Furthermore, it is  
402 unknown how mRNAs are targeted to the right location, for example to mitochondria. From  
403 the pool of FERRY-associated mRNA candidates that were identified by RNA sequencing, we  
404 observed that the complex binds different transcripts with different efficacies *in vitro*. Given  
405 the intricate mRNA binding interface of the FERRY complex, one can envision how the  
406 complex might be able to discriminate between different mRNAs (Quentin et al., 2021).  
407 However, mechanisms of specific interaction, localization and translation are much more  
408 complex and include regulatory elements for dynamic mRNA interaction, the recognition of  
409 post-transcriptional mRNA modifications, ways to recognize the correct target location as well  
410 as translational regulation. The FERRY complex may serve as a molecular tool to address these  
411 different aspects of specificity in mRNA trafficking in future studies.

## 412 **The FERRY complex from an evolutionary perspective**

413 The presence of mRNA or ribosomes on endosomes seems to be a common feature of  
414 eukaryotes, which has been observed in different organisms ranging from fungi to humans  
415 (Cioni et al., 2019; Das et al., 2021; Higuchi et al., 2014). To which degree this link between  
416 two fundamental functionalities, such as the endosomal system and the translation machinery,  
417 relies on common molecular mechanisms is less clear. Our phylogenetic analysis indicated that  
418 the FERRY complex has developed from an ancestral remnant in some fungi, via a three-  
419 protein assembly in insects and some nematodes, to its full extent in the Chordata (Figure 1G).  
420 The reduced version of the FERRY complex lacks Fy-4 and Fy-5 and comprises a shorter  
421 variant of Fy-2, which lacks the middle domain between the two, terminal coiled-coils  
422 (Figure 1B). While the interface on Fy-2 for Fy-1 and Fy-3 is located in the conserved C-  
423 terminal coiled-coil region, the binding interfaces for Fy-4 and Fy-5 reside in the middle  
424 domain of Fy-2, which is absent in the three-subunit version (Quentin et al., 2021). Hence, the  
425 locations of the interfaces indicate that the three-subunit version of the FERRY complex is still  
426 able to form a complex. However, whether this complex still links the early endosome with the  
427 translation machinery is not yet understood. With the nervous system becoming more and more  
428 complex during the course of evolution and since the loss of the FERRY complex has  
429 detrimental effects on the brain, it would be interesting to see whether the transition from the  
430 three-subunit to the five-subunit complex established new functionalities or additional layers  
431 of regulation.

## 432 **Attachment of mRNA on endosomes**

433 Recent studies have highlighted the vital role of different endosomal compartments, for mRNA  
434 transport and localization. While Annexin 11A mediates the binding and transport of mRNP  
435 granules on lysosomes, late endosomes were not only identified as mRNA transport vehicles  
436 but also serve as platform for translation in neurons (Cioni et al., 2019; Liao et al., 2019). With  
437 the occurrence of different connections between the endosomal system and the translation  
438 machinery, questions arise as to how many different transcripts bind to an endosome, how  
439 many mRNA binding sites can endosomes offer and whether these are provided by different  
440 RBPs. The observation of several, up to four mRNA foci, on a single endosome (Figure 5C)  
441 indicates that endosomes may be able to accommodate multiple mRNA binding events.  
442 However, it does not answer the question whether these originate from the same RBP or from  
443 different mRNA attachment systems. The presence of multiple different physical contacts  
444 between endosomes and mRNA is supported by a recent study, showing that transcripts can  
445 interact with early endosomes in a translation-dependent or translation independent fashion,  
446 which points towards different mechanisms (Popovic et al., 2020). However, the molecular  
447 mechanism of these binding modes remains elusive. Having multiple RBPs or complexes on  
448 the endosomes, immediately raises the question of how these systems are connected and  
449 whether they share tasks, either by function (mRNA transport, translational regulation), mRNA  
450 specificity (mitochondrial transcripts, synaptic mRNAs, mRNAs for stress response) or

451 location (mitochondria, synapse) or they have rather redundant functions, which might increase  
452 the robustness of mRNA localization. Furthermore, how the individual proteins or protein  
453 complexes communicate with each other will be an interesting field of future discoveries.

#### 454 **The role of mitochondrial transcripts**

455 The transport of mRNA for mitochondrial proteins on late endosomes was recently reported  
456 (Cioni et al., 2019). Now we propose the FERRY-mediated association of mitochondrial  
457 transcripts to the early endosome. Indeed, the specific late endosome cargo transcripts *lmnb2*  
458 and *vdac2* were also enriched in our screen for FERRY-associated transcripts, which raises the  
459 question about the purpose of different mRNA localization systems for a group of transcripts  
460 or even a single mRNA. Furthermore, a phylogenetic analysis also revealed the presence of the  
461 FERRY complex in *X. laevis* ruling out an explanation by genomic differences (Figure S2).  
462 However, nuclear-encoded messages for mitochondrial proteins form a large group of high  
463 abundant mRNAs, that need to be specifically localized to very distal sub-compartments of  
464 neurons, such as axonal growth cones or synapses. This opens up a variety of possible  
465 explanation, ranging from simple redundancy, to a division of labor in delivering to different  
466 neuronal sub-compartments, transporting different cargo mRNAs, or providing a different  
467 regulatory impact on the mitochondria, to even a scenario where one system is more  
468 responsible for transport while the other predominantly organizes storage or translation. Given  
469 the complex morphology of neurons and their energy requirement in various sub-  
470 compartments, an intricate system to maintain mitochondrial integrity and secure energy  
471 supplies is not surprising.

#### 472 **Connection between mRNA localization and neurodegeneration**

473 A disruption of the connection between the endosomal system and the translation machinery  
474 by mutation or genetic loss of a protein is often attended by neurological defects, such as  
475 epilepsy and neurodegeneration through the loss of the FERRY complex or in case of Marie-  
476 Charcot-Tooth disease by a mutation in Rab7 (Cioni et al., 2019). Other neurodegenerative  
477 diseases are also linked to mitochondrial dysfunction, such as Parkinson's, Huntington's or  
478 Alzheimer's disease (reviewed in: (Abou-Sleiman et al., 2006; Moreira et al., 2010; Park et al.,  
479 2018; Reddy et al., 2009)). Coincidentally, two of the three genetic diseases mentioned before  
480 seem to have an impact on the localization of transcripts for mitochondrial proteins, which  
481 might in turn affect mitochondrial function. While under normal conditions mitochondria  
482 might be able to compensate for the impairment of the supply chain for some proteins, a  
483 compensatory mechanism might fail, if too many proteins are affected by the lack of supply or  
484 if external or internal stresses overcharge the compensatory mechanisms. The extreme  
485 morphology of neurons, with their long and thin processes, offers an explanation as to why  
486 neurons are predominantly affected when mRNA transport *is* disrupted, since in cells with  
487 shorter dimensions diffusion might be able to compensate for that loss. In this scenario, it is  
488 also possible that the aberrant localization of mitochondrial transcripts, for example, can cause

489 a multitude of symptoms, depending on the neuronal sub-compartment in which the transcripts  
490 are missing, which might be determined by the respective mRNA distribution system.

491

## 492 **Acknowledgements**

493 Firstly, we thank R. Schäfer for her support with cell culture and cloning and I. Bartnik for  
494 excellent technical support. We also acknowledge S. Raunser and D. Quentin for valuable  
495 feedback regarding the manuscript and the members of the cluster of excellence “Physics of  
496 Life” for stimulating discussion. Especially, we would like to thank the following Services and  
497 Facilities of the MPI-CBG for their support: The antibody Facility, the light microscopy  
498 facility, the mass spectrometry facility, the genome engineering facility and protein expression  
499 and purification facility. We also thank the DRESDEN-concept Genome Center (DcGC at  
500 CMBC at the TU Dresden) supported by DFG (INST 269/768-1) for technical support.  
501 Furthermore, we would like to thank Refeyn Ltd (Oxford, UK) for the use of their Mass  
502 Photometer. Part of this work and J.S.S. were funded by the Deutsche Forschungsgemeinschaft  
503 (DFG, German Research Foundation) - Project Number 112927078 - TRR 83.

504

## 505 **Author contributions**

506 Conceptualization, J.S.S. and M.Z.; Software, L.H.; Formal Analysis, J.S.S., C.L., L.H., Y.K.,  
507 A.T.-P. and M.Z.; Investigation, J.S.S., S.t.D., A.G., S.S., S.C. and M.Z.; Data Curation, L.H.;  
508 Writing – Original Draft, J.S.S. and M.Z.; Writing – Review & Editing, all authors.;  
509 Visualization, J.S.S., C.L. and L.H.; Supervision, J.S.S. and M.Z.; Project Administration,  
510 J.S.S. and M.Z.; Funding Acquisition, E.M.S and M.Z.

511

## 512 **Competing interests:**

513 The authors declare no competing financial interests.

514

## 515 **Data availability:**

516 RNA Sequencing (RNA-Seq) data and the respective scripts for the analysis of the RNA-Seq  
517 and proteomics data are available in a public repository (<https://dx.doi.org/21.11101/0000-0007-EEE3-D>).

519

520

521

522

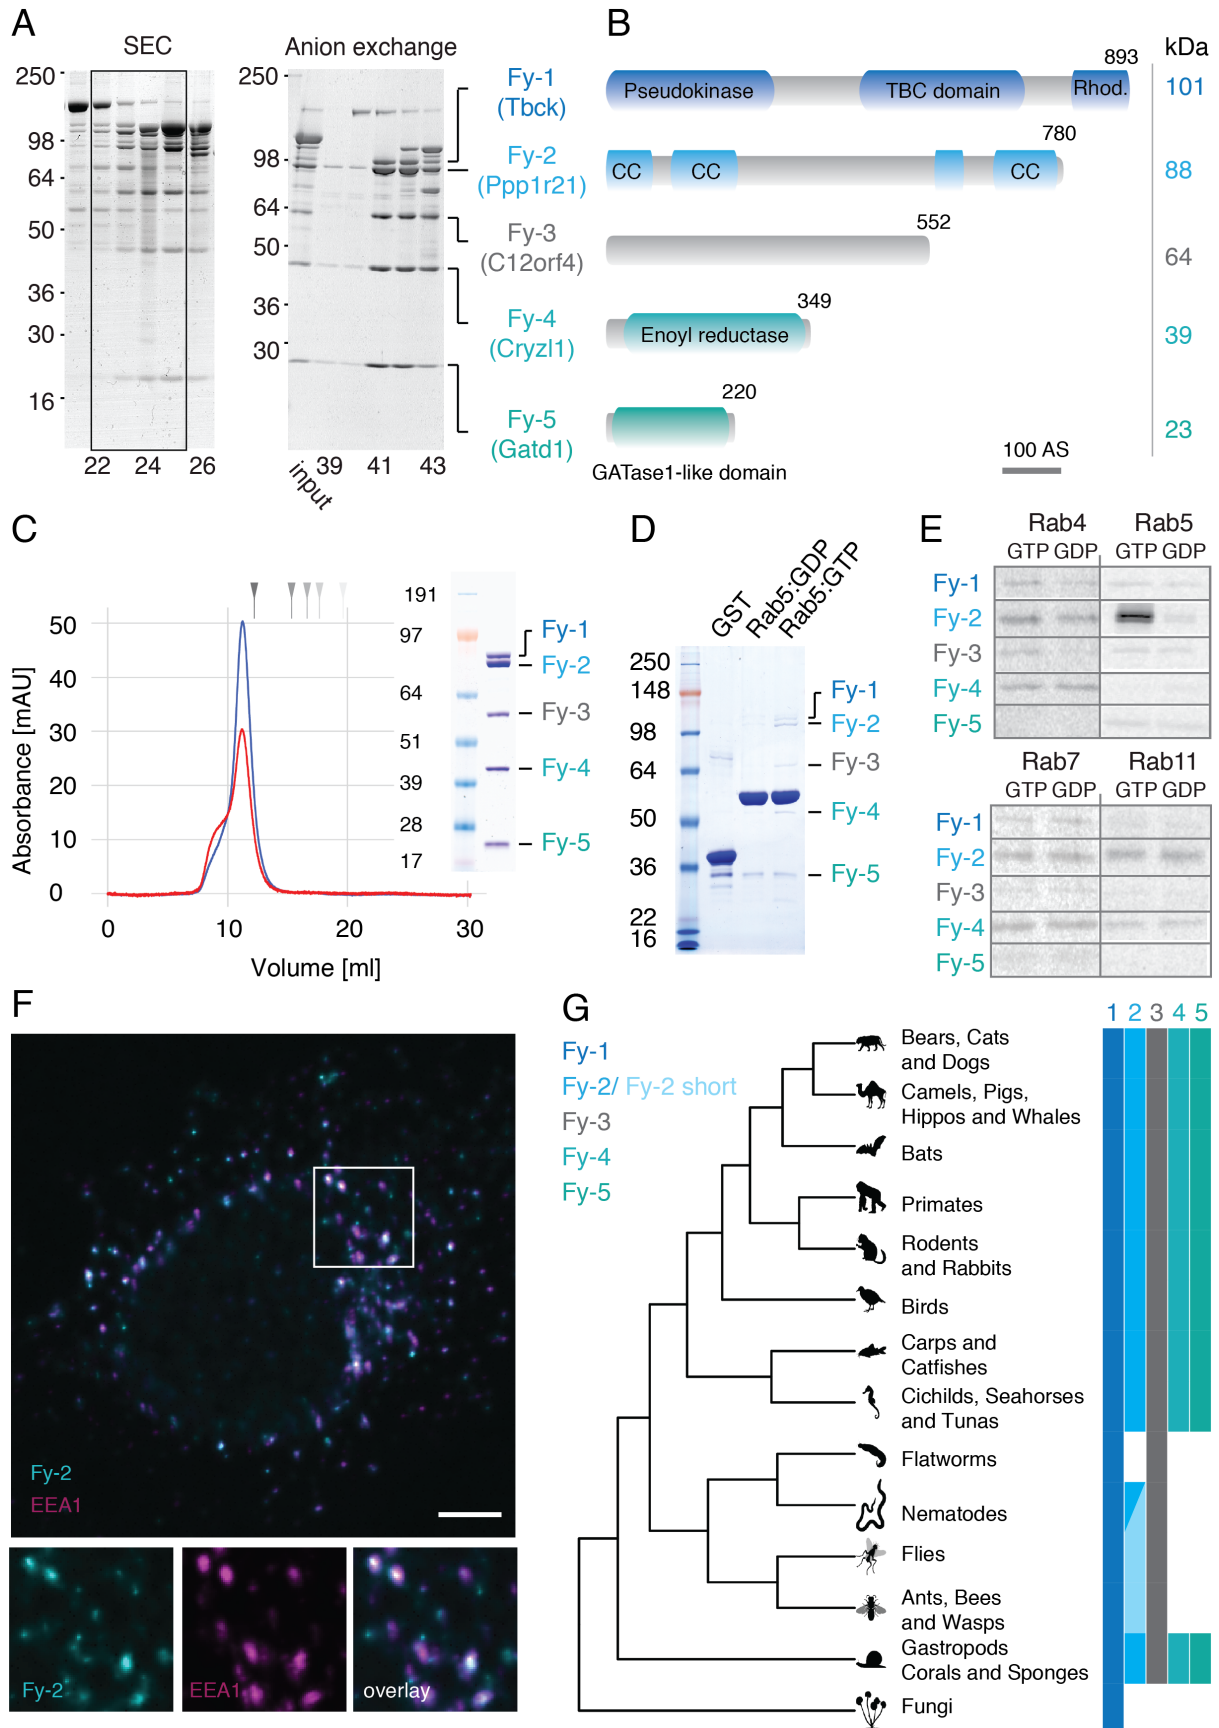

523

524

525

526

**Figure 1:** A) The entirety of Rab5 effectors, obtained by Rab5 affinity chromatography, was fractionated by two chromatographic techniques, i) size exclusion chromatography (SEC, left) and ii) anion exchange chromatography (right). The fractions were analyzed by SDS-PAGE and Coomassie staining. The five proteins of the new FERRY

527 complex co-eluted in fractions 22 to 25 from SEC (left gel). Fractions 22 to 25 were combined and subjected to  
528 an anion exchange chromatography. The fractions obtained were analyzed by SDS-PAGE and Coomassie staining  
529 (right gel). The input (loaded material) and fractions 39 to 43 are shown. **B)** Scheme of the domain architecture  
530 of the components of the FERRY complex drawn to scale (Rhod.: Rhodanese domain, CC: coiled-coil). **C)** SEC  
531 profile of the FERRY complex (blue: 280 nm, red: 254 nm) with a Coomassie-stained SDS PAGE of the peak  
532 fraction as inset. The grey arrows represent a molecular weight standard (670, 158, 44, 17, 1.35 kDa). **D)**  
533 Coomassie-stained SDS PAGE of an *in vitro* pulldown assay using GST, GST-Rab5:GDP and GST-Rab5:GTP  
534 to probe the interaction with the FERRY complex. **E)** Fluorographic analysis of GST binding assays using  
535 different Rab GTPases in the active and inactive state against *in vitro* translated <sup>35</sup>S methionine-containing  
536 components of the FERRY complex. **F)** Immunostaining of HeLa cells against EEA1 and Fy-2 (Scale bar: 5 μm).  
537 The individual channels of the boxed region is shown below in higher magnification. **G)** Phylogenetic analysis of  
538 the subunits of the FERRY complex (a full tree including individual species is given in Figure S2).  
539



## A workflow of the FERRY interactor screen

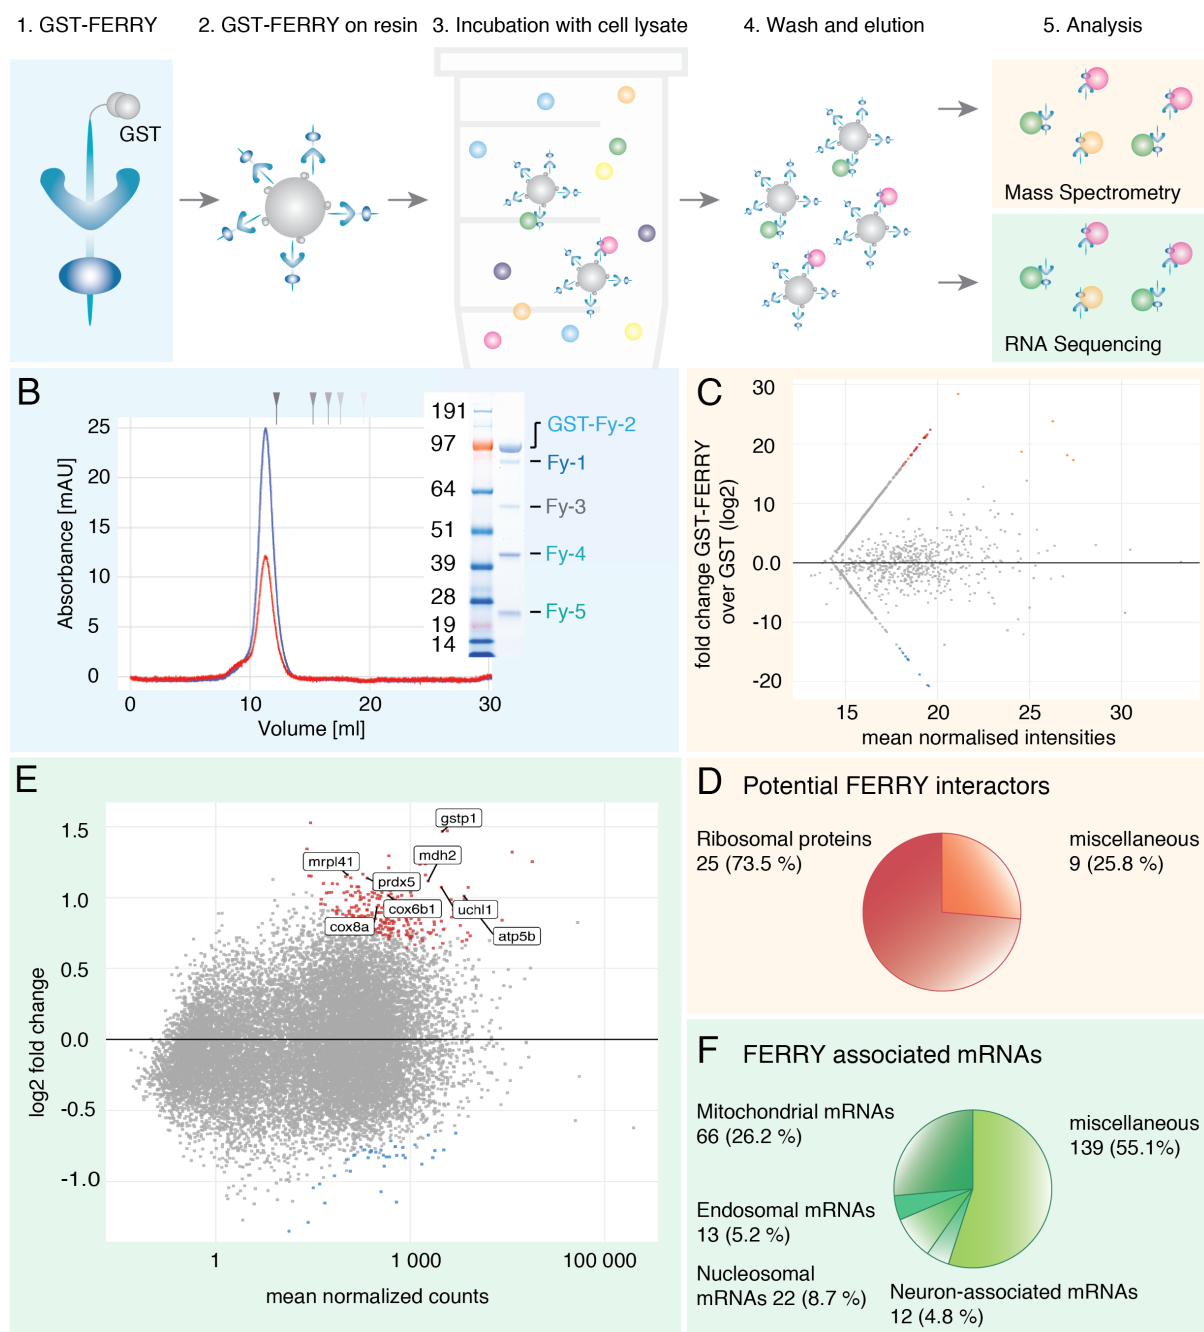

540

541 **Figure 2:** **A**) Scheme of the workflow of the *in vitro* GST-FERRY interactor screen. **B**) SEC profile of GST-  
 542 FERRY (blue: 280 nm, red: 254 nm) with an SDS PAGE of the peak fraction as inset. The grey arrows represent  
 543 a molecular weight standard (670, 158, 44, 17, 1.35 kDa). **C**) MA blot of the mass spectrometry results of the  
 544 GST-FERRY interactor screen, with a grey dot for each protein. Candidates enriched in GST-FERRY and GST  
 545 are indicated in red and blue, respectively. **D**) The pie chart visualizes different groups of the 34 potential FERRY  
 546 interactors **E**) MA blot of the RNA sequencing of potential FERRY-associated mRNAs. Each dot represents a  
 547 specific transcript. mRNA candidates associated with GST-FERRY and GST are highlighted in red and blue,  
 548 respectively, with some candidates labeled **F**) The pie chart shows the different groups of the 252 FERRY-  
 549 associated mRNAs.

550

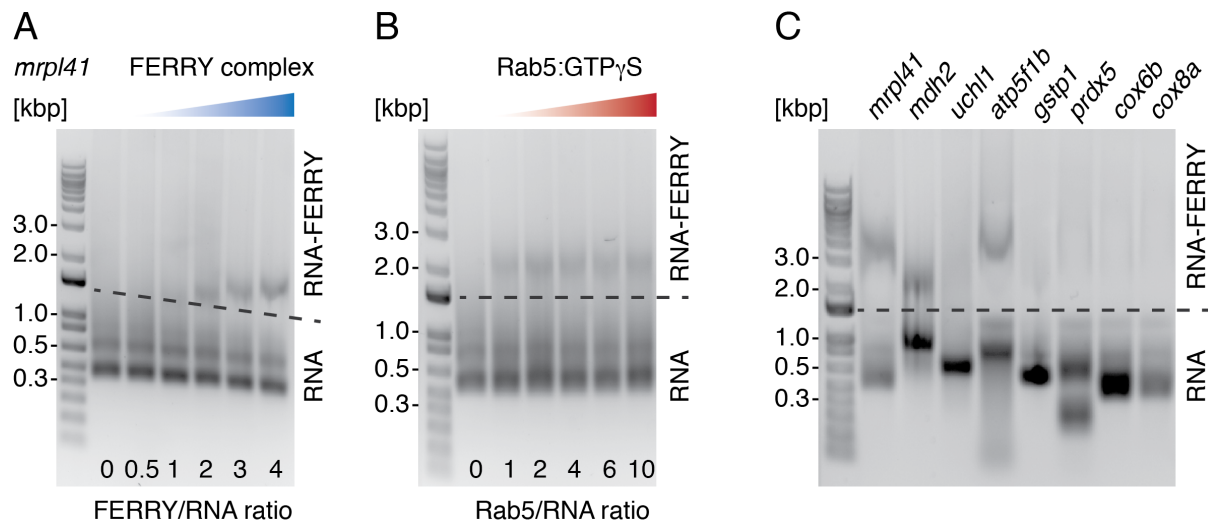

551

552 **Figure 3: A)** Results of an electrophoretic mobility shift assay (EMSA) to test the interaction between the FERRY  
553 complex and *mrpl41* mRNA with increasing ratios of FERRY complex to RNA. **B)** EMSA to probe the interaction  
554 between the FERRY complex and *mrpl4* in the presence of Rab5:GTP $\gamma$ S. For this assay a fixed ratio of FERRY  
555 complex to RNA of 3 was used, while the amounts of Rab5:GTP $\gamma$ S were successively increased as indicated. **C)**  
556 EMSA to assess the interaction of the FERRY complex with different mRNAs. This assay was performed at a  
557 fixed FERRY/mRNA ratio of 5.

558

559

560

**A** mRNA localization in HeLa cells

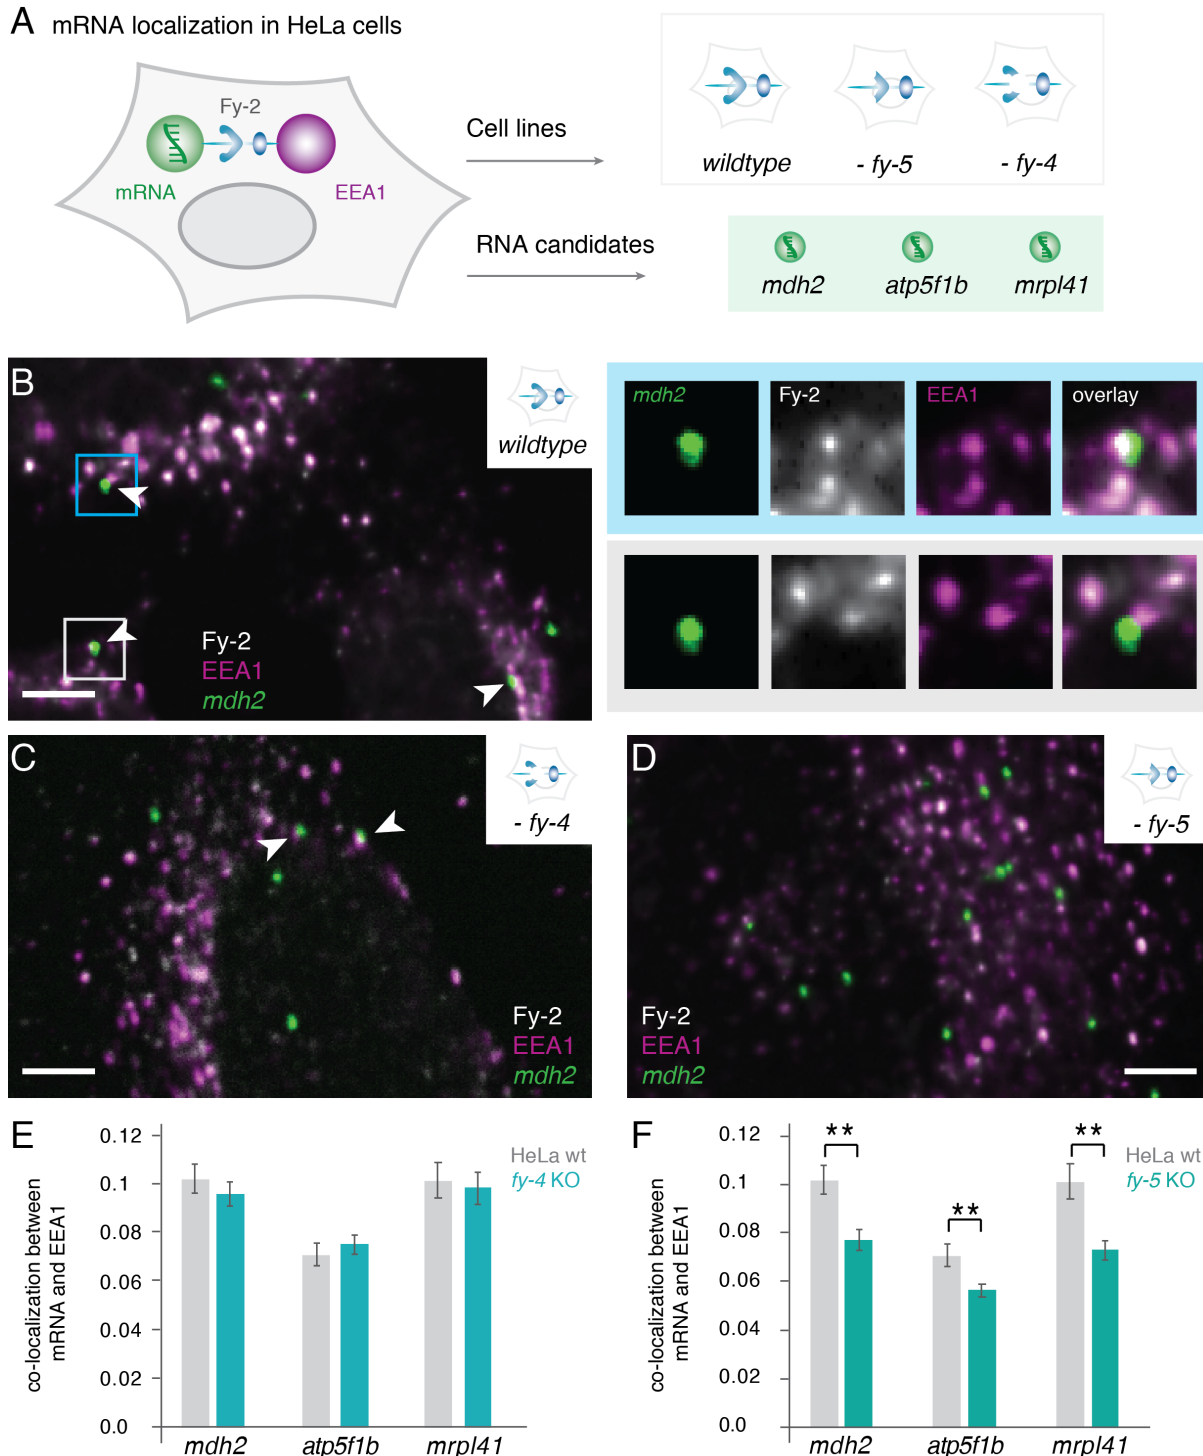

561

562

563

564

565

566

567

568

569

570

**Figure 4:** **A)** Scheme of the mRNA localization/ immunofluorescence experiment, showing the different markers (mRNA: smFISH, EEA1: antibody and Fy-2: antibody), mRNAs (in the green box) and cell lines (grey box) involved. **B)** Exemplary image of the combined visualization of Fy-2, EEA1 and *mdh2* mRNA in wildtype HeLa cells (Scale bar: 5  $\mu$ m). Events of co-localization of mRNA with Fy-2 and EEA1 are indicated with white arrow heads. Magnified images of the individual channels and the overlay of the two regions boxed in blue and grey are given on the right side. (images: 3.9 x 3.9  $\mu$ m). **C)** Exemplary image visualizing Fy-2, EEA1 and *mdh2* mRNA in the absence of Fy-4 (Scale bar: 5  $\mu$ m). Events of co-localization of mRNA with Fy-2 and EEA1 are indicated with white arrow heads. **D)** Exemplary image visualizing Fy-2, EEA1 and *mdh2* mRNA in the absence of Fy-5 (Scale bar: 5  $\mu$ m). **E)** Quantification of co-localization of the different mRNAs and EEA1 in HeLa wildtype cells

571 and upon knock-out of Fy-4. **F)** Quantification of co-localization of the different mRNAs and EEA1 in HeLa  
572 wildtype cells and upon knock-out of Fy-5. The asterisk indicates a statistically significant difference (p-value  
573 < 0.01)  
574

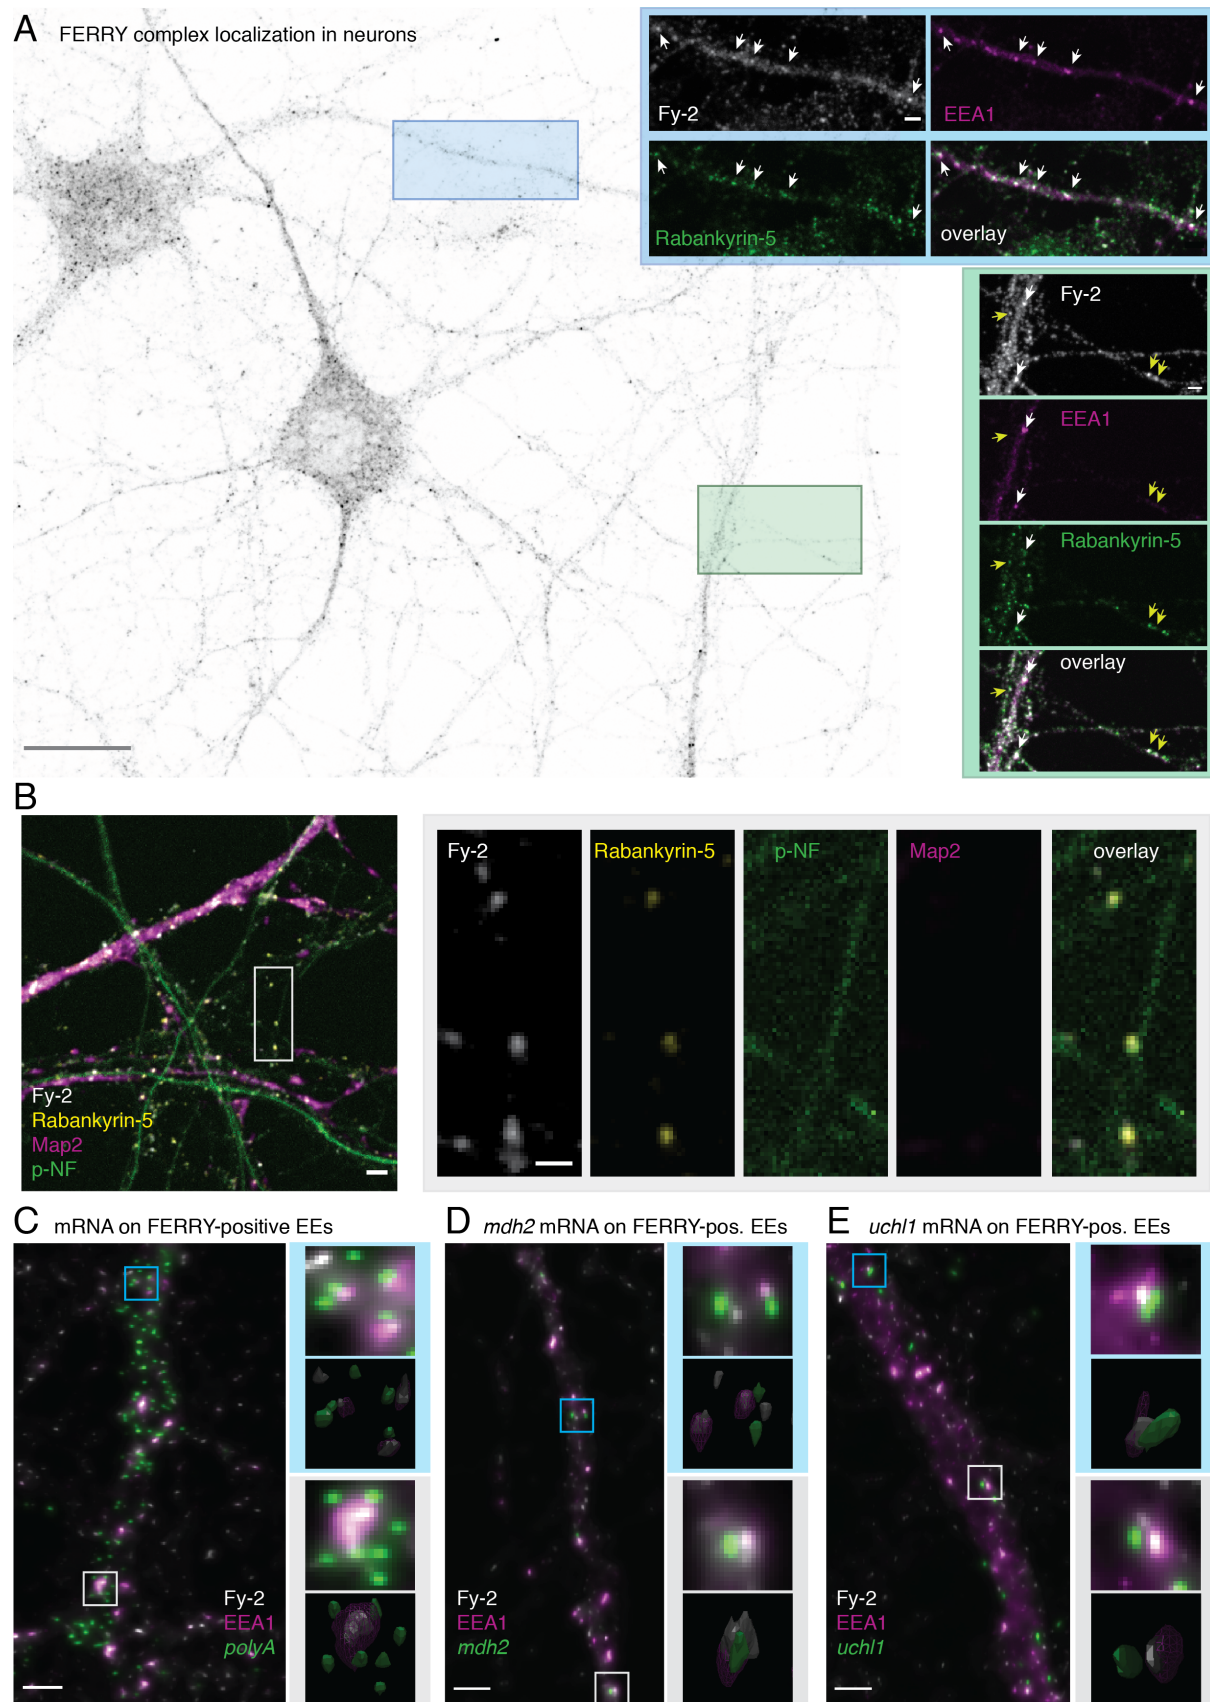

575

576 **Figure 5:** A) localization of the FERRY complex in neurons. Primary rat hippocampal neurons were grown at  
577 low density supported by an astrocyte feeder layer. After fixation, the Rab5 effectors Fy-2, EEA1 and Rabankyrin-  
578 5 were visualized by immunostaining. The overview image shows the localization of the FERRY complex on a

579 larger scale (Scale bar: 20  $\mu\text{m}$ ). The insets highlighted in green and blue show two boxed regions in higher  
580 magnification and additionally the localization of EEA1 and Rabankyrin-5 and the triple overlay (Scale bar:  
581 2  $\mu\text{m}$ ). Endosomes with a co-localization of all three markers are indicated with white arrowheads, while  
582 endosomes where only Fy-2 and Rabankyrin-5 co-localize are marked with yellow arrowheads. **B)** Primary rat  
583 hippocampal neurons were stained for Fy-2, Rabankyrin-5, Map2 and a phosphorylated neurofilament (pNF). The  
584 overview image shows an overlay of all four markers (Scale bar: 2  $\mu\text{m}$ ). A magnification of the region in the white  
585 box is given on the right, showing the single channels as well as an overlay (Scale bar: 1  $\mu\text{m}$ ). **C)** Combination of  
586 immunostaining of Fy-2 and EEA1 with smFISH against the polyA tail of mRNA in primary hippocampal  
587 neurons. Magnified images of the regions indicated in light grey and blue are given on the right in combination  
588 with a 3D representation. **D)** and **E)** show images of a combination of immunostaining of Fy-2 and EEA1 with  
589 smFISH against *mdh2* and *uchl1* mRNA in primary hippocampal neurons (Scale bar: 2  $\mu\text{m}$ ). Magnified images  
590 of the regions indicated in light grey and blue are given on the right in combination with a 3D representation.  
591

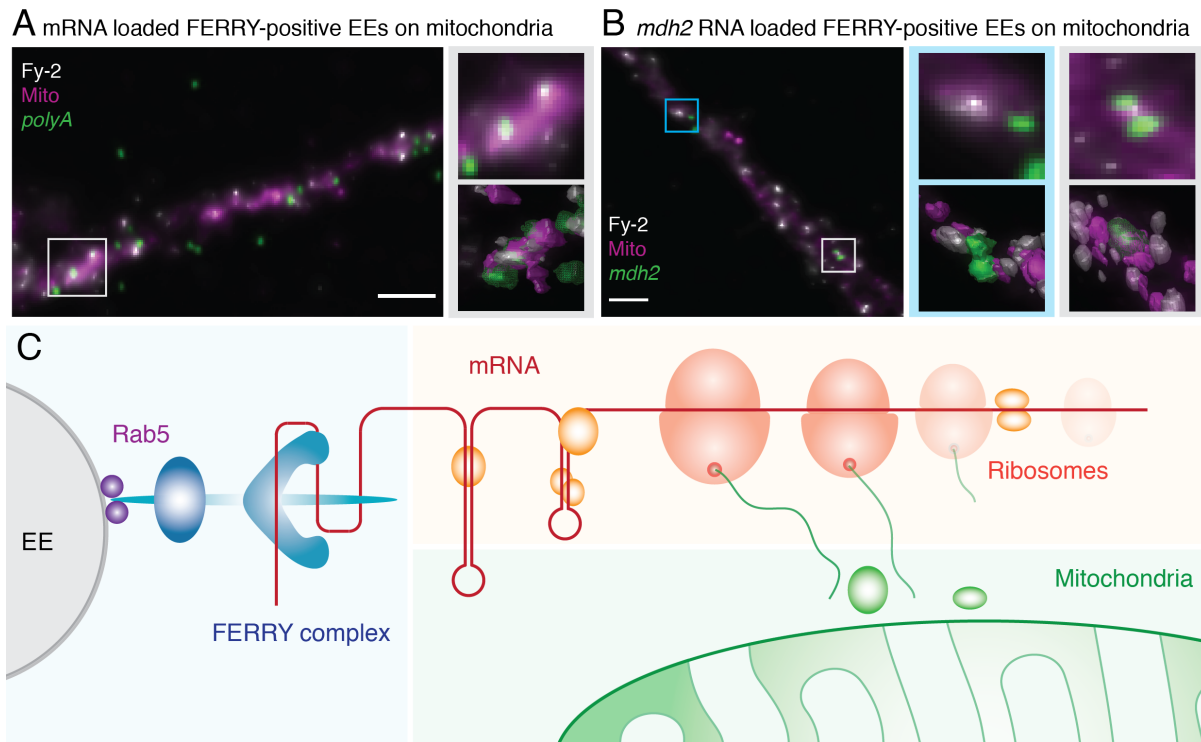

592

593 **Figure 6: A)** Combination of immunostaining of Fy-2 and Mitochondria (Tomm70a) and smFISH against polyA  
594 (Scale bar: 2  $\mu$ m). The boxed region is presented in higher magnification along with a 3D representation of the  
595 fluorescence signal. **B)** Immunostaining of Fy-2 and Mitochondria (Tomm70a) combined with smFISH against  
596 *mdh2* (Scale bar: 2  $\mu$ m). The boxed region is presented in higher magnification along with a 3D representation of  
597 the fluorescence signal **C)** Scheme of the current understanding of the cellular role of the FERRY complex. This  
598 novel Rab5 effector complex connects the early endosomes (blue colors) with the translation machinery (red  
599 colors) and predominantly associates with transcript for mitochondrial proteins (green).

600

## 601 **Methods**

### 602 **Molecular Cloning**

603 Human Fy-1 (Tbck, ENSG00000145348, Q8TEA7), Fy-2 (Ppp1r21, ENSG00000162869,  
604 Q6ZMI0), Fy-3 (C12orf4, ENSG00000047621, Q9NQ89), Fy-4 (Cryz11, ENSG00000205758,  
605 O95825), Fy-5 (Gatd1, ENSG00000177225, Q8NB37) and Rab5a (ENSG00000144566,  
606 P20339), were amplified by polymerase chain reaction (PCR) using Q5 High-Fidelity DNA  
607 polymerase (NEB) and digested using NotI, NcoI, AscI, XhoI, PciI (NEB) according to the  
608 manufacturer's protocol. Fy-5 was cloned into a pET based bacterial expression vector as an  
609 N-terminally hexahistidine (His<sub>6</sub>) tagged variant without cleavage site. Fy-4 was cloned into  
610 an expression vector for expression in SF9 cells also carrying a non-cleavable N-terminal His<sub>6</sub>  
611 tag. Fy-1, Fy-2 and Fy-3 were cloned into a multi gene construct based on a pBLA vector. For  
612 the purification of the FERRY complex Fy-1 carried a cleavable N-terminal His<sub>6</sub> tag, the other  
613 2 genes were untagged. To obtain GST-FERRY, Fy-2 carried a cleavable Gultathione-S-  
614 transferase (GST) tag, while Fy-1 and Fy-3 remained untagged. Rab5 was used as GST fusion  
615 variant in the bacterial expression vectors pGAT2 for GST pulldown assays and pGEX-6P-3  
616 for electrophoretic mobility shift assays (EMSA). Plasmids and primers used in this study are  
617 listed in the resources table (Table S2).

618

### 619 **Virus production and insect cell expression**

620 SF9 cells growing in ESF921 media (Expression Systems) were co-transfected with linearized  
621 viral genome and the expression plasmid, and selected for high infectivity. P1 and P2 viruses  
622 were generated according to the manufacturer's protocol. Best viruses were used to infect SF9  
623 cells at 10<sup>6</sup> cells/mL at 1% vol/vol and routinely harvested after around 48 hours at about  
624 1.5x10<sup>6</sup> cells/ml. The pellet was suspended in lysis buffer (20 mM HEPES (pH 7.5), 250 mM  
625 NaCl, 20 mM KCl, 20 mM MgCl<sub>2</sub> and 40 mM imidazole) or SEC buffer (20mM HEPES,  
626 pH 7.5, 250mM NaCl, 20mM KCl, 20mM MgCl<sub>2</sub>) supplemented with a protease inhibitor  
627 cocktail, flash frozen in liquid nitrogen and stored at -80 degrees.

628

### 629 **Protein purification**

#### 630 **Fy-5 and GST-Rab5:**

631 For expression of Fy-5 and GST-Rab5, *E. coli* BL21 (DE3) (company) were grown in LB  
632 medium under autoinduction conditions using D-(+)-lactose monohydrate at 1.75% (w/v),  
633 supplemented with the respective antibiotic (50 µg/mL kanamycin or 100 µg/mL ampicillin) at  
634 30 °C under constant shaking (165 rpm). Bacteria were harvested by centrifugation (4000 x g,  
635 20 min, 4 °C), suspended in lysis buffer and subsequently lysed or stored at -80 °C. After  
636 sonication the lysate was clarified by centrifugation (22 500 rpm/61 236 x g, 20 min, 4 °C) and



637 applied to a HisTrap FF column (GE Healthcare) equilibrated with 10 column volumes (CV)  
638 of lysis buffer. After extensive washing with lysis buffer, the proteins were eluted in 10-13 ml  
639 elution buffer (20 mM HEPES (pH 7.5), 250 mM NaCl, 20 mM KCl, 20 mM MgCl<sub>2</sub> and  
640 500 mM imidazole). Elution fractions containing protein were concentrated using Amicon  
641 Ultracel-10K/ Ultracel-30K (Millipore) centrifuge filters and subsequently applied to size  
642 exclusion chromatography (SEC) using a Superdex 200 column (HiLoad 16/600 Superdex  
643 200 pg, GE Healthcare) equilibrated in SEC buffer. Fractions were analysed using SDS-PAGE.  
644 Protein containing fractions were pooled and concentrated to fit experimental requirements.  
645 Protein concentrations were determined by spectrophotometer (NanoDrop Lite, Thermo  
646 Scientific).

#### 647 Fy-4:

648 For expression of Fy-4, insect cell suspensions were lysed using sonication, the lysate  
649 subsequently clarified by centrifugation (22 500 rpm/61 236 x g, 20 min, 4 °C), filtrated using  
650 Millex® HV membrane filter units with a pore size of 0.45 µm (Merck Millipore) and applied  
651 to a HisTrap FF column (GE Healthcare) equilibrated with 10 CV of lysis buffer. After washing  
652 with lysis buffer, the protein was eluted in 10-13 ml elution buffer and concentrated with a  
653 centrifuge filter, (Amicon Ultracel-30K, Millipore). Thereafter, the protein was applied to SEC  
654 using a Superdex 200 column (HiLoad 16/600 Superdex 200 pg, GE Healthcare) equilibrated  
655 in SEC buffer. The fractions were analysed by SDS-PAGE. Protein containing fractions were  
656 pooled and concentrated according to experimental requirements. The protein concentration  
657 was determined by spectrophotometer (NanoDrop Lite, Thermo Scientific).

#### 658 **FERRY complex:**

659 SF9 cell pellets prior infected with a virus containing Fy-1, Fy-2 and Fy-3 were melted and  
660 immediately supplemented with an excess of purified Fy-4 and Fy-5 before lysis.  
661 Subsequently, the cells were lysed using a Microfluidizer (LM20, Microfluidics). The lysate  
662 was clarified by centrifugation (22 500 rpm/61 236 x g, 20 min, 4 °C) and filtrated using  
663 membrane filters with a pore size of 0.45 µm (Millex® HV membrane filter units, Merck  
664 Millipore). The clarified lysate was supplemented with Ni-NTA agarose (1.3 ml resin/ 1 l insect  
665 cell pellet, Qiagen) and incubated for 30 mins at 4 °C on a rotating wheel. Subsequently, the  
666 resin was transferred into gravity flow chromatography columns (Poly-Prep® Chromatography  
667 Column, Bio-Rad) and washed 3 times with i) 8 CV lysis buffer, ii) 8 CV wash buffer (20 mM  
668 HEPES, pH 7.5, 250 mM NaCl, 20 mM KCl, 20 mM MgCl<sub>2</sub> and 80 mM imidazole), and iii)  
669 8 CV lysis buffer. The protein was eluted in 1 ml fractions with elution buffer and protein  
670 containing fractions were applied to SEC without further concentration, using either a  
671 Superdex 200 (HiLoad 16/600 Superdex 200 pg, GE Healthcare) or a Superose 6 increase  
672 (Superose 6 Increase 10/300 GL, GE Healthcare) which were equilibrated in SEC buffer.  
673 Protein containing fractions were pooled and concentrated according to experimental  
674 requirements. Concentration was determined by a spectrophotometer (NanoDrop Lite, Thermo  
675 Scientific)

676 **GST-FERRY complex:**

677 SF9 cell pellets prior infected with a virus containing Fy-1, GST-Fy-2 and Fy-3 were melted  
678 and immediately supplemented with an excess of purified Fy-4 and Fy-5. The cells were lysed  
679 using a Microfluidizer (LM20, Microfluidics), the lysate was clarified by centrifugation  
680 (22 500 rpm/61 236 x g, 20 min, 4 °C) and subsequently filtrated using membrane filters with  
681 a pore size of 0.45 µm (Millex® HV membrane filter units, Merck Millipore). The clarified  
682 lysate was supplemented with Glutathione Sepharose 4B (Cytiva, 2.2 ml resin/1 l insect cell  
683 pellet) and incubated for 1.5 h at 4 °C on a rotating wheel. The beads were washed once with  
684 10 ml SEC buffer supplemented with purified Fy-4 and 5 and 2 times with 10 ml SEC buffer.  
685 To elute the GST-FERRY complex, the beads were incubated with GSH buffer (20 mM  
686 HEPES (pH 7.5), 250 mM NaCl, 20 mM KCl, 20 mM MgCl<sub>2</sub>, 20 mM GSH) for 1.5 h at 4 °C  
687 on a rotating wheel and the beads were removed using filter columns (MoBiTec). The protein  
688 complex was concentrated using centrifuge filters (Amicon Ultracel-30K, Millipore) and  
689 subjected to SEC using a Superdex 200 column (HiLoad 16/600 Superdex 200 pg, GE  
690 Healthcare) equilibrated in SEC buffer. Protein containing fractions were pooled and  
691 concentrated according to experimental requirements. Concentration was determined by a  
692 spectrophotometer (NanoDrop Lite, Thermo Scientific)

693 **Rab5:GTPγS:**

694 Expression of Rab5a was performed under autoinduction conditions as described before (Fy-5  
695 and GST-Rab5). Harvested bacterial pellets were resuspended in SEC buffer and lysed using  
696 sonication. Glutathione Sepharose 4B (Cytiva) was added to the clarified lysate and incubated  
697 for 1.5 h at 4 °C. The resin was washed 3 times with SEC buffer and the protein cleaved off  
698 the resin using HRV 3C protease (produced in house) at 4 °C over night on a rotating wheel.  
699 Afterwards, the protein was concentrated using Amicon Ultracel-30K (Millipore) centrifuge  
700 filters and subsequently applied to SEC using a Superdex 200 column (HiLoad 16/600  
701 Superdex 200 pg, GE Healthcare) equilibrated in SEC buffer. Fractions were analyzed using  
702 SDS-PAGE. Protein containing fractions were pooled and concentrated according to  
703 experimental requirements. The protein concentration was determined by a spectrophotometer  
704 (NanoDrop Lite, Thermo Scientific).

705 For the nucleotide loading, Rab5 was concentrated using an Amicon Ultracel-30K (Millipore)  
706 centrifuge filter, subsequently supplemented with 2.5 mM GTPγS and 250 nM of a GST fusion  
707 of the Rab5 GEF domain of Rabex5 (GST-Vps9) and incubated for 1 h on ice. To remove the  
708 Rab5 GEF domain, Glutathione Sepharose 4B (Cytiva) was added to the mixture and incubated  
709 for 1.5 h at 4 °C. The resin was pelleted by centrifugation (12 000 rpm/ 15 300 x g, 10 min,  
710 4 °C) and the supernatant containing the GTPγS loaded Rab5 was flash frozen and stored at -  
711 80 °C. The protein concentration was determined using a BCA assay (Pierce™ BCA Protein  
712 Assay Kit, Thermo Scientific).

713

## 714 **GST pulldown assay**

715 1.1 nmol of purified GST or GST-Rab5 was incubated with 12  $\mu$ l Glutathione Sepharose 4B  
716 (Cytiva) in 400  $\mu$ l SEC buffer in small filter columns (MoBiTec) on a rotating wheel for 30 min  
717 at room temperature (rt). Subsequent centrifugation (4000 rpm/3500 x g, 1 min, 4 °C) removed  
718 unbound protein and the resin was washed once with 400  $\mu$ l SEC buffer. For nucleotide  
719 exchange, 2 mM nucleotide (GDP or GTP) and 235 nM of GST-Vps9 was added to the columns  
720 in 400  $\mu$ l SEC buffer and incubated for 10 min at rt. After centrifugation (4000 rpm/3500 x g,  
721 1 min, 4 °C), 0.8 nmol FERRY complex was added to the columns in 400  $\mu$ l SEC buffer and  
722 incubated for 10 min at rt. Again, unbound protein was removed by centrifugation  
723 (4000 rpm/3500 x g, 1 min, 4 °C) and the columns were washed 3 times with 400  $\mu$ l SEC  
724 buffer. Proteins were eluted with 40  $\mu$ l of GSH buffer (SEC buffer with 20 mM GSH) for  
725 20 min at rt and analysed by SDS-PAGE.

726

## 727 **Identifying orthologous sequences**

728 We downloaded all eukaryotic reference proteomes from uniprot (last accessed: March 2<sup>nd</sup>  
729 2020) (UniProt, 2019). We used PorthoMCL (Tabari and Su, 2017) to identify orthologous  
730 clusters containing human FERRY components (GALD1\_HUMAN, QORL1\_HUMAN,  
731 CL004\_HUMAN, PPR21\_HUMAN, TBCK\_HUMAN). Sequences deviating strongly in  
732 length (Figure S1B) from their human homolog were removed (Table S2). We further  
733 distinguished PPR21\_HUMAN orthologs between sequences which contain a Fy-4 and a Fy-  
734 5 binding site and sequences which do not. For the detection of the presence of the Fy-4 and  
735 the Fy-5 binding sites, we aligned all identified Fy-2 sequences. We considered the binding  
736 sites present if all of the regions aligned to the PPR21\_HUMAN binding regions contained less  
737 than 20% gaps (ignoring gapped sites in PPR21\_HUMAN).

738

## 739 **Phylogenetic tree estimation**

740 All orthologous clusters were scanned for species which contain at least 80% of identified  
741 species with FERRY proteins (custom R script; R 3.6.1; (R Core Team, 2019)). Sequences  
742 belonging to FERRY containing species were extracted and aligned using MAFFT with default  
743 settings (Rozewicki et al., 2019). Each alignment was trimmed using trimAL (Capella-  
744 Gutierrez et al., 2009). The maximum likelihood (ML) tree was estimated using IQTree  
745 (Nguyen et al., 2015) whereby each protein was represented as a partition (Chernomor et al.,  
746 2016). The Whelan and Goldman matrix (Whelan and Goldman, 2001) with ML optimized  
747 amino acid frequencies (WAG+FO) was used as common model for all partitions. Branch  
748 support was calculated by IQTree via ultra-fast bootstrapping (UFBoot, 10,000) (Hoang et al.,  
749 2018). The consensus tree with the presents/absence information was visualized using the  
750 R package ggtree (Version 2.0.4) (Yu et al., 2018; Yu et al., 2017).

751

## 752 **FERRY evolution and ancestral state reconstruction**

753 The identified orthologous genes were used to estimate the ancestral composition of the  
754 FERRY complex. The probability for each protein's presence at each internal node was  
755 estimated using Pagel's algorithm (Pagel, 1994) implemented in the R package ape  
756 (Version 5.3) (Paradis and Schliep, 2019).

757

## 758 **Antibody production**

759 Rabbit polyclonal antibodies against Fy-4 were raised in NZW rabbits using standard  
760 procedures. 200 ug of recombinant protein emulsified in Complete Freund's adjuvant was used  
761 for immunization. Three boosts were done at 4-week intervals using 200 ug of recombinant  
762 protein emulsified in Incomplete Freund's adjuvant. The final bleed was harvested 10 days  
763 after the last boost. Antibodies were affinity-purified on Fy-4 immobilized on a HiTrap NHS-  
764 activated HP column (GE Healthcare). Antibodies were eluted using Pierce Gentle Ag/Ab  
765 Elution Buffer (ThermoFisher).

766 Mouse monoclonal antibodies against different components of the FERRY complex were  
767 raised in Balb/c mice after subtractive immunization (Sleister and Rao, 2001) with Fy-5. Mice  
768 were injected with recombinant Fy-5 in the presence of the immunosuppression drug  
769 cyclophosphamide in order to preferentially eliminate Fy-5-reactive B and T lymphocytes.  
770 Thereafter the mice were immunized with the entire FERRY complex. Hybridoma were  
771 generated using PEG fusions following standard protocols. Clones reacting with individual  
772 components of the FERRY complex were selected in a multiplex electrochemiluminescence  
773 assay on the MSD platform (MesoScale Discovery, Rockville, MD). Antibodies were purified  
774 from hybridoma supernatant using HiTrap Protein G columns (GE Healthcare).

775

## 776 **Antibody validation**

777 Validation of in-house produced antibodies against components of the FERRY complex for  
778 western blot (WB) were tested against 100 ng, 10 ng and 1 ng of recombinant FERRY  
779 complex. Candidates with high sensitivity (detection of 1 ng) and good selectivity (preferably  
780 no or no interfering additional signal) were chosen.

781 To validate the mouse monoclonal Fy-2 antibody for immunofluorescence (IF), we generated  
782 a *fy-2* knock-out HeLa cell line making use of the CRISPR/Cas9 technology. Even though,  
783 western blot analysis showed the disappearance of the Fy-2 signal (Figure S4), we observed  
784 residual signal by immunofluorescence with the same antibody (Figure S1). Given the fact,  
785 that the western blot signal is already weak in the wildtype (wt), a small residual fraction of  
786 protein might be below the detection limit. The remaining fluorescence signal may either be

787 caused by residual, maybe truncated Fy-2 protein in the *fy-2* KO cell line or the recognition of  
788 an additional protein by the antibody. Nevertheless, we observed a clear difference in signal  
789 intensity between wt and the *fy-2* KO condition in immunofluorescence (Figure S1) and  
790 therefore concluded that the antibody recognizes Fy-2 and is suitable for immunofluorescence.  
791 To further control for the specificity, we co-stained with EEA1 whenever possible and checked  
792 the fluorescence signal by visual inspection. We also excluded the Fy-2 antibody signal from  
793 automated image analysis, especially automated object detection, since the residual signal  
794 interferes with finding general parameters for object identification.

795

## 796 **Antibodies**

797 The following primary antibodies were used for IF or WB experiments at the concentrations  
798 or dilutions indicated: anti-Rab5 (mouse, monoclonal, BD Bioscience, 610725, IF 1:100), anti-  
799 EEA1 (rabbit, polyclonal, laboratory-made, IF 1:1000), anti-Rabankyrin-5 (rat, monoclonal,  
800 laboratory-made, IF 1:2000), anti-Map2 (rabbit, polyclonal, Chemicon, IF 1:1000), anti-pNF-  
801 H (mouse, monoclonal, Biolegend, IF 1:5000), anti-Fy-1 (rabbit, polyclonal, Sigma Aldrich,  
802 HPA039951, WB 1:1000) anti-Fy-2 (mouse, monoclonal, laboratory-made, IF 1:1000, WB 0.5  
803  $\mu\text{g}/\mu\text{l}$ ), anti-Fy-3 (rabbit, polyclonal, Sigma Aldrich, HPA037871, WB 1:1000), anti-Fy-4  
804 (rabbit, polyclonal, laboratory-made, IF 1:1000, WB 0.5  $\mu\text{g}/\mu\text{l}$ ), anti-Fy-5 (mouse, monoclonal,  
805 laboratory-made) WB (0.5  $\mu\text{g}/\mu\text{l}$ ) and anti-GAPDH (rabbit, monoclonal, Sigma Aldrich,  
806 G8795, WB 1:5000).

807 The following fluorescent secondary antibodies for immunostainings were purchased from  
808 Invitrogen and used in a 1:1000 dilution: Goat anti-Rat IgG (H+L) Highly Cross-Adsorbed  
809 Secondary Antibody, Alexa Fluor 488, Goat anti-Mouse IgG (H+L) Highly Cross-Adsorbed  
810 Secondary Antibody, Alexa Fluor 568, Goat anti-Mouse IgG (H+L) Cross-Adsorbed  
811 Secondary Antibody, Alexa Fluor 405, Goat anti-Rabbit IgG (H+L) Cross-Adsorbed  
812 Secondary Antibody, Alexa Fluor 647, F(ab')<sub>2</sub>-Goat anti-Rabbit IgG (H+L) Cross-Adsorbed  
813 Secondary Antibody, Alexa Fluor 647, Goat anti-Mouse IgG (H+L) Cross-Adsorbed  
814 Secondary Antibody, Alexa Fluor 488. For Western blot horseradish peroxidase (HRP)  
815 secondary antibodies were supplied from Jackson ImmunoResearch and used at a 1:10 000  
816 dilution.

817

## 818 **HEK 293 lysate preparation**

819 FreeStyle™ 293-F Cells (Thermo Fisher Scientific) were grown in suspension culture in  
820 FreeStyle™ 293 Expression Medium (Thermo Fisher Scientific) to density of  $4 \times 10^6$  cells/ml  
821 and harvested by centrifugation (500 x g, 10 min, 20 °C). The cell pellets were suspended in  
822 lysate buffer (6 ml/ liter cell culture, 50 mM HEPES (pH 7.5), 100 mM NaCl, 5 mM MgCl<sub>2</sub>,  
823 1 mM DTT, 0.1% Tween 20), supplemented with a protease inhibitor cocktail and immediately

824 flash frozen in liquid nitrogen. For lysate preparation the pellets were melted, lysed using a  
825 microfluidizer (LM20, microfluidics). The lysate was subsequently clarified by a two-step  
826 centrifugation (4000 rpm/ 1935 x g, 10 min, 4 °C and 22 500 rpm/ 61 236 x g, 25 min, 4 °C),  
827 yielding around 15 ml cells lysate per liter cell culture.

828

### 829 **GST-FERRY interactor screens**

830 The GST-FERRY interactor screen was performed at 4 °C in gravity flow filter columns (Poly-  
831 Prep® Chromatography Column, Bio-Rad). 500 µl Glutathione Sepharose 4B (GE Healthcare)  
832 was added to 0.8 µmol of GST or 7 mg of GST-FERRY complex in 9 ml SEC buffer and  
833 incubated for 2.5 h on a rotating wheel. The solution was let run through and the resulting bed  
834 of beads was washed 3 x 2 ml SEC buffer. 10 ml of freshly prepared HEK 293 lysate was added  
835 to each column and incubated for 1.5 h on a rotating wheel. The lysate was allowed to flow  
836 through and another 5 ml of cell lysate was added to each column and also run through the  
837 column. The columns were extensively washed with 4 ml lysis buffer and 2 x 5 ml and 2 x 7 ml  
838 SEC+ buffer (20 mM HEPES, pH 7.5, 250 mM NaCl, 20 mM KCl, 20 mM MgCl<sub>2</sub>, 1 mM DTT  
839 and 0.1% Tween 20). For the elution of the proteins the columns were incubated with 500 µl  
840 of GSH buffer for 40 min on a rotating wheel. The elution fractions were visualized by SDS  
841 PAGE and further analysed by mass spectrometry.

842 To isolate FERRY-associated RNA, the GST-FERRY interactor experiment was performed as  
843 described with slight modifications. For the elution of the proteins and the associated RNA,  
844 RLT buffer from the AllPrep DNA/RNA/miRNA Universal Kit (Qiagen) was supplemented  
845 with 1% β-Mercaptoethanol and 20 mM GSH and the pH adjusted to 7.5. The subsequent  
846 isolation of nucleic acids was performed using the AllPrep DNA/RNA/miRNA Universal Kit  
847 (Qiagen) according to the manufacturer's protocol. The obtained RNA samples were flash  
848 frozen and stored at -80 °C. Prior sequencing, the concentration of the samples was determined  
849 by spectrophotometer (NanoDrop Lite, Thermo Scientific) and the samples were analyzed  
850 using a 2100 Bioanalyzer (Agilent).

851

### 852 **Mass spectrometry**

853 Samples were separated on SDS PAGE, visualized with Coomassie staining and entire gel  
854 lanes cut in 10 pieces each of which was processed individually. Proteins were in-gel reduced  
855 by dithiothreitol (DTT), alkylated by iodoacetamide and digested overnight with trypsin  
856 (Promega). The resulting peptide mixtures were extracted twice by exchange of 5% formic  
857 acid (FA) and acetonitrile, extracts pulled together and dried in a vacuum centrifuge. Peptides  
858 were re-suspended in 25µl of 5% FA and 5µl aliquot was analysed by LC-MS/MS on a  
859 nanoUPLC system interfaced on-line to a Q Exactive HF Orbitrap mass spectrometer (both  
860 Thermo Fischer Scientific). The nanoUPLC was equipped with an Acclaim PepMap100 C18

861 75  $\mu\text{m}$  i.d. x 20 mm trap column and 75  $\mu\text{m}$  x 50 cm analytical column (3 $\mu\text{m}$ /100A, Thermo  
862 Fisher Scientific). Peptides were separated using a 80 min linear gradient; solvent A - 0.1%  
863 aqueous FA, solvent B - 0.1% FA in acetonitrile. Blank runs were introduced after each sample  
864 analysis to minimize carryover. Instrument performance was monitored with QCloud system  
865 (Chiva et al., 2018). Data were acquired using a Top 20 approach; precursor m/z range was  
866 350-1600 and dynamic exclusion time was 20 s. The lock-mass function was set on the  
867 background ion (Si(CH<sub>3</sub>)<sub>2</sub>O)<sub>6</sub> at m/z 445.12. Acquired spectra were converted into the .mgf  
868 format and merged into a single file for each sample.

869 Acquired data were processed with the MaxQuant software package (v.1.6.10.43) using default  
870 setting iBAC options, with Match-Between-Runs (MBR) disabled. Enzyme specificity was  
871 trypsin, number of allowed miscleavages – two; variable modification – cysteine  
872 carbamidomethyl, propionamide; methionine oxidation; protein N-terminus acetylated.

873

## 874 **Mass photometry**

875 Mass Photometry (MP, iSCAMS) of the FERRY complex was performed on a One<sup>MP</sup>  
876 instrument (Refeyn, Oxford, UK) at room temperature. High precision 24 x 50 mm coverslips  
877 (Thorlabs CG15KH) were cleaned with ultrasound, rinsed with isopropanol and water and  
878 dried with clean nitrogen gas (Young et al., 2018). 20  $\mu\text{l}$  diluted FERRY complex (43 and  
879 34 nM, in PBS) was spotted into a reusable culture well gasket with 3 mm diameter and 1mm  
880 depth (Grace Bio-Labs). MP signals were recorded for 60 s at a suitable concentration in order  
881 to detect a sufficient set of target particles (>500). Raw MP data were processed in the  
882 DiscoverMP software (Refeyn, Oxford, UK).

883

## 884 **Library preparation and Sequencing**

885 mRNA was enriched from 100ng DNase treated total RNA using the NEBNext rRNA  
886 depletion Kit (human, mouse, rat, NEB) according to the manufacturer's instructions. Final  
887 elution was done in 5  $\mu\text{l}$  nuclease free water. Samples were then directly subjected to the  
888 workflow for strand specific RNA-Seq library preparation (NEBNext Ultra II Directional RNA  
889 Library Prep, NEB). 0.15  $\mu\text{M}$  NEB Adaptor were used for ligation. Non-ligated adaptors were  
890 removed by adding XP beads (Beckmann Coulter) in a ratio of 1:0.9. Dual indexing was done  
891 during the following PCR enrichment (12 cycles, 65°C) using custom amplification primers  
892 carrying the index sequence indicated with 'NNNNNNN'. (Primer1: AAT GAT ACG GCG  
893 ACC ACC GAG ATC TAC ACT CTT TCC CTA CAC GAC GCT CTT CCG ATC T, primer2:  
894 CAA GCA GAA GAC GGC ATA CGA GAT NNNNNNNN GTG ACT GGA GTT CAG  
895 ACG TGT GCT CTT CCG ATC T). After two more XP bead purifications (1:0.9) libraries  
896 were quantified using the Fragment Analyzer (Agilent). Libraries were equimolarly pooled  
897 before sequencing them with a length of 75 bp in single end mode on an Illumina NextSeq 500  
898 system to a depth of at least  $2 \times 10^7$  reads.

899

## 900 **Analysis of the mass spectrometry data**

901 From the MaxQuant proteinGroups.txt file only protein groups with at least 1 unique peptide  
902 and which were identified in at least two out of three biological replicates in at least one  
903 condition were considered for differential abundance analysis using DEP v1.4.0 (Zhang et al.,  
904 2018). After variance stabilizing normalization (Huber et al., 2002) of iBAQ intensities,  
905 missing values were imputed applying the nearest neighbor averaging imputation method  
906 (KNN) to missing at random (MAR) and left-censored imputation using a deterministic  
907 minimal value approach (MinDet) to missing not at random (MNAR) protein groups (Gatto et  
908 al., 2021). MNARs refer to those protein groups with missing values in all replicates of one of  
909 the two conditions while all other missing values are considered as MAR. The application of  
910 empirical Bayes statistics on protein group-wise linear models was done using limma (Ritchie  
911 et al., 2015) and differentially abundant proteins were identified by applying a log<sub>2</sub> fold change  
912 threshold of 1 and an adjusted p-value cutoff of 0.05.

913

## 914 **Analysis of the RNA sequencing data**

915 Raw reads were checked for their overall quality using FastQC v0.11.2 (Andrews, 2010). Read  
916 mapping to the human genome reference assembly (GRCh38\_p13) and genes counts  
917 estimation based on Ensembl release v99 (Yates et al., 2020) were done using STAR v2.5.2b  
918 (--outFilterMultimapNmax 1 --outSJfilterCountUniqueMin 8 3 3 3 --quantMode GeneCounts;  
919 (Dobin et al., 2013) by taking read strandedness into account. Count data were filtered genes  
920 with more than 10 counts in any sample and served as input for differential gene expression  
921 analysis using DESeq2 v1.22.1 (Love et al., 2014). A log<sub>2</sub>-fold change threshold of 1 and an  
922 adjusted p-value cutoff of 0.01 was applied to FDRs obtained by using IHW v1.10.1 (Ignatiadis  
923 et al., 2016). Results summary in form of a MA plot was done using ggplot2 v3.2.1 (Wickham,  
924 2016) following layout settings from the ggpubr package v0.2.5 (Kassambara, 2020).

925

## 926 **Rab5 affinity chromatography**

927 GST-Rab5 affinity chromatography was carried out as described before (Christoforidis et al.,  
928 1999). In summary, GST-Rab5:GDP or GST-Rab5:GTP $\gamma$ S loaded glutathione Sepharose was  
929 incubated with bovine brain cytosol, the beads extensively washed and the bound proteins  
930 subsequently eluted. The resulting mixture of Rab5 effector proteins was further purified by  
931 SEC and anion exchange chromatography. Fractions were analyzed using silver stained SDS  
932 PAGE.

933



## 934 ***In vitro* translation binding assay**

935 Binding assays with *in vitro* translated proteins were essentially performed as described  
936 (Nielsen et al., 2000). Briefly, [<sup>35</sup>S]-methionine-labelled proteins were transcribed and  
937 translated using a TnT™ coupled transcription–translation kit (Promega) according to the  
938 manufacturer’s protocol. Resulting proteins were incubated with GST-Rab5:GDP or GST-  
939 Rab5:GTPγS loaded Glutathione Sepharose for 2 h at 4 °C. Subsequently, the beads were  
940 washed and Rab5-bound proteins were eluted and analyzed by SDS PAGE and fluorography  
941 as described (Christoforidis et al., 1999).

942

## 943 **mRNA production and electrophoretic motility shift assays (EMSA)**

944 mRNA sequences for *mrpl41*, *mdh2*, *uchl1*, *atp5f1b*, *gstp1*, *prdx5*, *cox6b* and *cox8a* comprise  
945 the coding region, the 3’ and 5’ untranslated regions (UTRs) and an additional polyA appendix  
946 of 50 adenines (Table S2). The mRNAs were produced by *in vitro* transcription using the T7  
947 RiboMAX™ Express Large Scale RNA Production System (Promega) according to the  
948 manufacturer’s protocol. Resulting RNA was purified using a Phenol:Chloroform extraction  
949 and an isopropanol precipitation as described in the manual of the mMACHINE  
950 mMACHINE™ T7 Transcription kit (Thermo Fisher). In brief, the *in vitro* transcription  
951 reactions were quenched with Ammonium acetate stop solution from the mMACHINE  
952 mMACHINE™ T7 Transcription Kit (Thermo Fisher) and supplemented with  
953 Phenol:Chloroform:Isoamyl Alcohol 25:24:1 (Sigma Aldrich). The aqueous phase was  
954 recovered and RNA precipitated by adding equal amounts of isopropanol. After chilling at  
955 - 20 °C for at least 15 min, the precipitated RNA was pelleted by centrifugation (20 800 x g,  
956 15 min, 4 °C), the supernatant removed and the pellet resuspended in RNase-free water. RNA  
957 concentrations were determined by spectrophotometer (NanoDrop Lite, Thermo Scientific)  
958 and the RNA was stored at - 80 °C until usage.

959 For direct RNA-protein interaction assays, 15 pmol of mRNA were mixed with protein  
960 (FERRY complex, Fy-4, Fy-5, Rab5:GTPγS or combinations) in varying protein/RNA ratios  
961 in SEC buffer in a total volume of 35 μl and subsequently incubated for 80 min at 37 °C. The  
962 samples were analyzed by ethidium bromide-stained gel electrophoresis using 1% agarose gels.

963

## 964 **Generation of HeLa knockout (KO) cell lines**

965 To generate gene knockouts in HeLa, we used CRISPR/Cas9 cleavage induced random (NHEJ  
966 mediated) mutations using guide RNAs targeted 5’ end of the coding sequence of the genes of  
967 interest. We used electroporation of Cas9 protein complexed with crRNA and trRNAs (altR,  
968 IDT), using the Neon electroporator device and kits (Invitrogen) with concentrations and  
969 electroporation settings as previously described (Spiegel et al., 2019). For list of crRNA  
970 protospacers used for each gene, see the resources table (Table S2). The success of the gene

971 disruption was initially assessed by western blot of single cell derived clones. The disruption  
972 of the target alleles was further confirmed by fluorescent PCR and Sanger sequencing of PCR  
973 amplicons (For the genotyping primers used and description of the alleles, see the resources  
974 table (Table S2).

975

## 976 **HeLa cell culture**

977 HeLa Kyoto and FERRY subunit knock-out cells were cultured in DMEM media supplemented  
978 with 10% FBS Superior (Merck) and 50 µg/ml streptomycin (P/S) (Gibco) at 37°C with 5%  
979 CO<sub>2</sub>. For smFISH studies, cells were seeded into 384 well plates at a density of 3000 cells/well  
980 in 50 µl using the drop dispenser (Multidrop, Thermo Fischer Scientific) and cultured for 24h.

981

## 982 **Single molecule fluorescence in situ hybridization (smFISH) and immunostaining**

983 Endosomes and endogenous mRNAs were stained by using the ViewRNA® Cell Plus Assay  
984 kit (Invitrogen, 88-19000). The kit consists of 16 solutions that are used to perform an immuno-  
985 fluorescence staining followed by a single molecule fluorescence in situ hybridization  
986 (smFISH) using the sequential branched-DNA amplification technique. The manufactures  
987 protocol for 96 well plates was adapted to a 384 well plate format by down-scaling to  
988 12.5 µl/well for steps containing staining solutions and to 25 µl/well for steps containing  
989 washing/fixing solutions (96 well protocol: 50 µl and 100 µl, respectively). For details see the  
990 manufactures protocol ([https://assets.thermofisher.com/TFS-Assets/LSG/manuals/88-  
991 19000.pdf](https://assets.thermofisher.com/TFS-Assets/LSG/manuals/88-19000.pdf)).

992 In brief, all steps were performed manually using an 8-channel aspirator for removal and  
993 automated multi-channel pipettes for addition of liquids. All wash steps following fixation and  
994 immunostaining were done 3 times with PBS including RNase inhibitor solution, whereas all  
995 wash steps following smFISH were done 5 times with RNA wash buffer solution. Cells were  
996 fixed and permeabilized using the provided solutions of the kit. After washing with PBS, cells  
997 were incubated with blocking buffer, primary antibody solution (including EEA1 and Fy-2  
998 antibodies at a dilution of 1:2000 and 1:1000, respectively) and secondary solutions (including  
999 antibodies against rabbit and mouse IgG labelled with Alexa 488 or Alexa 568 (Alexa 647 for  
1000 probe HPRT1), respectively, at a dilution of 1:500). After immunostaining cells were fixed and  
1001 ready for smFISH. Different probes were used to label different mRNAs (Invitrogen, all probes  
1002 were of type 6 (647nm), except the house-keeping gene HPRT1 (type 1, 546nm);  
1003 *atp5f1b*: VA6-3168504, *mdh2*: VA6-3172506, *mrpl41*: VA6-3169863, *hprt1*: VA1-11124).  
1004 Cells were incubated for 2h at 40°C with a diluted probe. After washing the cells with RNA  
1005 wash buffer solution, the protocol was continued the next day with the smFISH branched-DNA  
1006 amplification technique steps. Subsequently, cells were incubated with pre-amplifier, amplifier  
1007 and label solution each for 1h at 40°C. Finally, the cells were stored in PBS containing DAPI  
1008 (1µg/mL) to stain the nuclei and CellMaskBlue (CMB) (0.25µg/mL) to stain the cytoplasm.

1009

## 1010 **Preparation of hippocampal cultures**

1011 Primary rat hippocampal neurons used in this study were obtained and cultured in two different  
1012 ways. For initial Fy-2 localization experiments, the protocol for culturing hippocampal neurons  
1013 was adapted from (Goto-Silva et al., 2019) with slight modifications. In brief, neurons were  
1014 isolated from rat embryos at E17. The rat hippocampi from embryos of either sex were  
1015 dissected in PBS (25 mM Na-phosphate buffer, pH 7.4, 110 mM NaCl, 1 mM EDTA) and  
1016 dissociated in digestion solution (100 mg/ml DNase I and 200 Units Papain in PBS) for  
1017 20 min. After two washes of the tissue with plating medium (DMEM containing 10% FCS,  
1018 2 mM glutamine, 50 mg/ml penicillin/streptomycin, Invitrogen), it was triturated in plating  
1019 medium and subsequently cells counted. The neurons were plated on glass cover slips coated  
1020 with 1 mg/ml poly-L-lysine (Sigma-Aldrich) at a density of 25 000 cells/ml in the presence of  
1021 a mouse astrocyte feeder layer, derived from the mouse cortex from mice of age P0-P3 of either  
1022 sex (Kaech and Banker, 2006).

1023 Primary neurons for mRNA localization experiments were obtained and cultured according to  
1024 the following protocol. Neuronal cultures were prepared from dissociated hippocampi of P0/P1  
1025 SD rats as previously described (Cajigas et al., 2012). Hippocampi were collected in  
1026 Dissociation Medium on ice (DM with 1 mM HEPES, 82 mM Na<sub>2</sub>SO<sub>4</sub>, 30 mM K<sub>2</sub>SO<sub>4</sub>, 5.8 mM  
1027 MgCl<sub>2</sub>, 0.252 mM CaCl<sub>2</sub>, 20 mM Glucose, 0.001% Phenol Red) and treated with cysteine-  
1028 activated papain solution in DM (10 ml DM, 3.2 mg Cysteine, 300 µl Papain Sigma P3125, pH  
1029 readjusted to 7, filtered sterile) two times 15 min at 37°C before several washes with cold DM  
1030 and Neuronal growth medium (NGM: Neurobasal A supplemented with B27 and Glutamax).  
1031 Dissociation of the tissue was achieved by trituration through a 10 ml pipette for 10 times.  
1032 Before counting in a Neubauer chamber, cells were pelleted by centrifugation for 5 min, 67 x g  
1033 at 4 °C, resuspended in cold NGM and 30 000 cells were seeded in 250 µl NGM on poly-D-  
1034 Lys coated 14 mm MatTek glass bottom dishes. After attachment of the cells (2-3 h later)  
1035 0.7 ml conditioned NGM (80% NGM, 15% glia-conditioned NGM, 5% cortical neuron-  
1036 conditioned NGM) was added and regular feeding by addition of NGM was performed  
1037 thereafter. The neurons were kept in an incubator at 37°C in a humidified atmosphere with 5%  
1038 CO<sub>2</sub>.

1039

## 1040 **Animals**

1041 The rat pups were used without gender determination. Timed pregnant rats were purchased  
1042 from either Janvier (RjHan:WI - Wistar rats) or Charles River Laboratories, maintained under  
1043 food and water ad libitum in a 12h-12h light dark cycle until pups were delivered, pups were  
1044 sacrificed shortly after birth by decapitation with sharp scissors before dissection of the tissue.  
1045 The procedures involving animal treatment and care were conducted in conformity with the  
1046 institutional guidelines that are in compliance with the national and international laws and

1047 policies (DIRECTIVE2010/63/EU; German animal welfare law, FELASA guidelines) and  
1048 approved by and reported to the local governmental supervising authorities  
1049 (Regierungspräsidium Darmstadt and Landesdirektion Sachsen). The animals were euthanized  
1050 according to annex 2 of §2 Abs. 2 Tierschutz-Versuchstier-Verordnung.

1051

### 1052 **Immunostaining of neurons**

1053 Immunostaining was performed at room temperature and the plates were subsequently stored  
1054 at 4 °C if necessary. After adhesion, cells were washed once with PBS and fixed using 3%  
1055 Paraformaldehyde (PFA) for 15 min. After washing with PBS, residual PFA was quenched  
1056 using 500 mM Ammonium chloride in PBS for 10 min and the cells were washed 3 times with  
1057 PBS. For permeabilization the cells were treated with 0.1% Triton X-100 in PBS for 3 min and  
1058 subsequently washed three times with PBS. After blocking with 10% FBS for 20 min, the cells  
1059 were incubated with the primary antibody for 2 h. Before and after the application of the  
1060 secondary antibody for 1 h, the cells were washed 3 times with PBS.

1061

### 1062 **High sensitivity FISH and immunostaining in neurons**

1063 In situ hybridization was performed using the ViewRNA ISH Cell Assay Kit (Thermo Fisher)  
1064 according to the manufacturer's protocol with the modifications described previously (Cajigas  
1065 et al., 2012). Probe sets targeting the respective mRNAs were purchased from Thermo Fisher.  
1066 In brief, rat hippocampal neuron cultures grown for two weeks on MatTek glass bottom dishes  
1067 were fixed for 20 min with PBS containing 1mM MgCl<sub>2</sub>, 0.1 mM CaCl<sub>2</sub>, 4% Sucrose and 4%  
1068 PFA, pH 7.4 at room temperature, washed and subsequently permeabilized for 3 min with the  
1069 provided detergent solution. Gene specific type1 (Uchl1) and type6 (Mdh2, polyA) probe sets  
1070 were applied in 1:100 dilution for 3 h at 40°C. After several washes signal amplification steps  
1071 with PreAmp/Amp and Label Probe reagents coupled to a 550 nm dye were all performed for  
1072 1 h at 40°C followed by washes at room temperature after each step. All probe sets and  
1073 branched DNA reagents were diluted in the provided solutions 1:100. Immunostaining for Fy-  
1074 2, endosome and mitochondria markers was performed after completion of the FISH protocol.  
1075 FISH-stained cells were blocked for 30 min in blocking buffer (BB) at room temperature (BB:  
1076 PBS with 4% goat serum) and incubated with primary antibodies in BB for 1 h at room  
1077 temperature. After washing, secondary antibodies in BB were applied for 30 min, cells were  
1078 washed and nuclei stained by a 3 min incubation with 1 µg/µl DAPI in PBS. Cells were washed  
1079 in PBS and mounted with Aquapolymount (Polysciences).

1080

## 1081 **Microscopy**

### 1082 **automated HeLa imaging:**

1083 Confocal imaging was performed on an automated spinning disc confocal microscope  
1084 (Yokogawa CV7000) using a 60x 1.2NA objective. DAPI and CMB was acquired with a laser  
1085 excitation at 405 nm and an emission band pass filter BP445/45, Alexa 488 with a 488 nm laser  
1086 and BP525/50 filter, Alexa 568 with a 561 nm laser and BP600/37 filter, Alexa 647 with a  
1087 640 nm laser and a BP676/29 filter. 9 fields were acquired per well as a stack with 4 z-planes  
1088 and 1  $\mu\text{m}$  distance. Each condition was done in duplicate wells and three independent  
1089 experiments.

### 1090 **Spinning disk neuron imaging:**

1091 Neurons were imaged on a Nikon TiE spinning disk microscope equipped with a 100x/ 1.45NA  
1092 Plan Apochromat, DIC oil immersion objective, Yokogawa CSU-X1 scan head and a Andor  
1093 DU-897 back-illuminated CCD detector. Images were acquired with 600 ms exposure, while  
1094 the laser intensities were adapted to the respective antibodies and requirements. Overview  
1095 images of almost entire neurons were taken as a set of individual small images (6 x 6 images)  
1096 with an overlap of 5% and combined using the Fiji implemented Grid/Collection Stitching tool  
1097 (Preibisch et al., 2009) without overlap computation.

### 1098 **confocal neuron imaging:**

1099 Images were acquired with a LSM780 confocal microscope (Zeiss) equipped with Zen10  
1100 software using a 63x/1.46-NA oil objective (alpha Plan Apochromat 63x/1.46 oil DIC M27)  
1101 and Argon 488, DPSS 561 and HeNe 633 laser lines for excitation in single tracks and a  
1102 MBS488/561/633 beam splitter. Images were acquired in 12-bit mode as z-stacks and a time  
1103 series with 4x Zoom, 512px x 512 px resolution and 0.1  $\mu\text{m}$  Tetraspec beads (ThermoFisher)  
1104 imaged under the same conditions. The laser power and detector gain in each channel was set  
1105 to cover the full dynamic range but avoid saturated pixels.

1106

## 1107 **Image analysis**

### 1108 **HeLa cell images**

1109 Microscopy images for the localization of Fy-2, EEA1 and different mRNAs in HeLa cells  
1110 were processed using the stand-alone freely available software MotionTracking (MT)  
1111 (<http://motiontracking.mpi-cbg.de>). Images of were imported into MT and subsequently  
1112 corrected for the chromatic shift of individual channels based on images of Tetraspec beads.  
1113 For quantification, fluorescent foci of EEA1 and mRNA were detected using automated object  
1114 detection and the co-localization was calculated based on 0.35 overlap threshold (Collinet et  
1115 al., 2010; Kalaidzidis et al., 2015).

1116

## 1117 **Neuron images**

1118 Microscopy images for the localization of Fy-2, EEA1, mRNA and mitochondria in neurons  
1119 were also processed with MT. Image sequences of fixed neurons were imported into MT and  
1120 drift corrected and deconvoluted by algorithms implemented in MT. In a last step, images were  
1121 corrected for the chromatic shift of individual channels based on images of Tetraspec beads  
1122 before and after the imaging. Motion Tracking implemented object detection was used to  
1123 determine the mRNA foci while subsequent image analysis and quantification was performed  
1124 by visual inspection. Given the possible distance between the fluorescence signals of EEA1  
1125 and mRNA or Fy-2 and mRNA (Figure S6), automated object detection followed by a co-  
1126 localization analysis was not suitable for this purpose.

1127

## 1128 **Western blotting**

1129 Cells were collected from a 10 cm cell culture dish, washed with cold PBS and subsequently  
1130 lysed in PBS supplemented with 1% Triton X-100. HeLa cell lysates were clarified by  
1131 centrifugation (14 000 rpm/ 20 800 x g, 15 min, 4 °C) and the concentration determined using  
1132 a BCA assay (Pierce™ BCA Protein Assay Kit, Thermo Scientific). After running an SDS  
1133 PAGE (12%), the gel was subsequently transferred onto a nitrocellulose membrane  
1134 (Amersham). Blots were washed with PBST (PBS supplemented with 0.1% Tween 20) and  
1135 then incubated with WB blocking buffer (5% non-fat milk powder in PBST) over night at 4 °C.  
1136 After washing with PBST blots were then incubated with the primary antibodies (anti-Fy-1 to  
1137 anti-Fy-5 and anti-GAPDH as a loading control) at the dilutions indicated earlier for 1 h at  
1138 room temperature. After washing the secondary HRP antibody was applied to the blot for 1 h  
1139 at room temperature. All antibodies were added in PBST with 5% milk. The blots were  
1140 developed using ECL™ Western Blotting Reagents (Cytiva) on respective films (Amersham)  
1141 in a Kodak X-OMAT 200 Processor.

1142

## 1143 **References**

1144

1145 Abou-Sleiman, P.M., Muqit, M.M., and Wood, N.W. (2006). Expanding insights of  
1146 mitochondrial dysfunction in Parkinson's disease. *Nat Rev Neurosci* 7, 207-219.

1147 Andreassi, C., Zimmermann, C., Mitter, R., Fusco, S., De Vita, S., Saiardi, A., and Riccio, A.  
1148 (2010). An NGF-responsive element targets myo-inositol monophosphatase-1 mRNA to  
1149 sympathetic neuron axons. *Nat Neurosci* 13, 291-301.

1150 Andrews, S. (2010). FastQC: A Quality Control Tool for High Throughput Sequence Data  
1151 <http://www.bioinformatics.babraham.ac.uk/projects/fastqc/>.

1152 Becalska, A.N., and Gavis, E.R. (2009). Lighting up mRNA localization in *Drosophila*  
1153 oogenesis. *Development* 136, 2493-2503.

- 1154 Beck-Wodl, S., Harzer, K., Sturm, M., Buchert, R., Riess, O., Mennel, H.D., Latta, E.,  
1155 Pagenstecher, A., and Keber, U. (2018). Homozygous TBC1 domain-containing kinase  
1156 (TBCK) mutation causes a novel lysosomal storage disease - a new type of neuronal ceroid  
1157 lipofuscinosis (CLN15)? *Acta Neuropathol Commun* *6*, 145.
- 1158 Bhoj, E.J., Li, D., Harr, M., Edvardson, S., Elpeleg, O., Chisholm, E., Juusola, J., Douglas, G.,  
1159 Guillen Sacoto, M.J., Siquier-Pernet, K., *et al.* (2016). Mutations in TBCK, Encoding TBC1-  
1160 Domain-Containing Kinase, Lead to a Recognizable Syndrome of Intellectual Disability and  
1161 Hypotonia. *Am J Hum Genet* *98*, 782-788.
- 1162 Briese, M., Saal, L., Appenzeller, S., Moradi, M., Baluapuri, A., and Sendtner, M. (2016).  
1163 Whole transcriptome profiling reveals the RNA content of motor axons. *Nucleic Acids Res* *44*,  
1164 e33.
- 1165 Buxbaum, A.R., Haimovich, G., and Singer, R.H. (2015). In the right place at the right time:  
1166 visualizing and understanding mRNA localization. *Nat Rev Mol Cell Biol* *16*, 95-109.
- 1167 Cajigas, I.J., Tushev, G., Will, T.J., tom Dieck, S., Fuerst, N., and Schuman, E.M. (2012). The  
1168 local transcriptome in the synaptic neuropil revealed by deep sequencing and high-resolution  
1169 imaging. *Neuron* *74*, 453-466.
- 1170 Capella-Gutierrez, S., Silla-Martinez, J.M., and Gabaldon, T. (2009). trimAl: a tool for  
1171 automated alignment trimming in large-scale phylogenetic analyses. *Bioinformatics* *25*, 1972-  
1172 1973.
- 1173 Cezanne, A., Lauer, J., Solomatina, A., Sbalzarini, I.F., and Zerial, M. (2020). A non-linear  
1174 system patterns Rab5 GTPase on the membrane. *Elife* *9*.
- 1175 Chernomor, O., von Haeseler, A., and Minh, B.Q. (2016). Terrace Aware Data Structure for  
1176 Phylogenomic Inference from Supermatrices. *Syst Biol* *65*, 997-1008.
- 1177 Chiva, C., Olivella, R., Borrás, E., Espadas, G., Pastor, O., Sole, A., and Sabido, E. (2018).  
1178 QCloud: A cloud-based quality control system for mass spectrometry-based proteomics  
1179 laboratories. *PLoS One* *13*, e0189209.
- 1180 Chong, J.X., Caputo, V., Phelps, I.G., Stella, L., Worgan, L., Dempsey, J.C., Nguyen, A.,  
1181 Leuzzi, V., Webster, R., Pizzuti, A., *et al.* (2016). Recessive Inactivating Mutations in TBCK,  
1182 Encoding a Rab GTPase-Activating Protein, Cause Severe Infantile Syndromic  
1183 Encephalopathy. *Am J Hum Genet* *98*, 772-781.
- 1184 Christoforidis, S., McBride, H.M., Burgoyne, R.D., and Zerial, M. (1999). The Rab5 effector  
1185 EEA1 is a core component of endosome docking. *Nature* *397*, 621-625.
- 1186 Cioni, J.M., Koppers, M., and Holt, C.E. (2018). Molecular control of local translation in axon  
1187 development and maintenance. *Curr Opin Neurobiol* *51*, 86-94.
- 1188 Cioni, J.M., Lin, J.Q., Holtermann, A.V., Koppers, M., Jakobs, M.A.H., Azizi, A., Turner-  
1189 Bridger, B., Shigeoka, T., Franze, K., Harris, W.A., *et al.* (2019). Late Endosomes Act as  
1190 mRNA Translation Platforms and Sustain Mitochondria in Axons. *Cell* *176*, 56-72 e15.
- 1191 Collinet, C., Stoter, M., Bradshaw, C.R., Samusik, N., Rink, J.C., Kenski, D., Habermann, B.,  
1192 Buchholz, F., Henschel, R., Mueller, M.S., *et al.* (2010). Systems survey of endocytosis by  
1193 multiparametric image analysis. *Nature* *464*, 243-249.
- 1194 Das, S., Vera, M., Gandin, V., Singer, R.H., and Tutucci, E. (2021). Intracellular mRNA  
1195 transport and localized translation. *Nat Rev Mol Cell Biol*.

- 1196 Deguchi, M., Hata, Y., Takeuchi, M., Ide, N., Hirao, K., Yao, I., Irie, M., Toyoda, A., and  
1197 Takai, Y. (1998). BEGAIN (brain-enriched guanylate kinase-associated protein), a novel  
1198 neuronal PSD-95/SAP90-binding protein. *J Biol Chem* 273, 26269-26272.
- 1199 Dobin, A., Davis, C.A., Schlesinger, F., Drenkow, J., Zaleski, C., Jha, S., Batut, P., Chaisson,  
1200 M., and Gingeras, T.R. (2013). STAR: ultrafast universal RNA-seq aligner. *Bioinformatics* 29,  
1201 15-21.
- 1202 Franke, C., Repnik, U., Segeletz, S., Brouilly, N., Kalaidzidis, Y., Verbavatz, J.M., and Zerial,  
1203 M. (2019). Correlative single-molecule localization microscopy and electron tomography  
1204 reveals endosome nanoscale domains. *Traffic* 20, 601-617.
- 1205 Gatto, L., Gibb, S., and Rainer, J. (2021). MSnbase, Efficient and Elegant R-Based Processing  
1206 and Visualization of Raw Mass Spectrometry Data. *J Proteome Res* 20, 1063-1069.
- 1207 Glock, C., Heumuller, M., and Schuman, E.M. (2017). mRNA transport & local translation in  
1208 neurons. *Curr Opin Neurobiol* 45, 169-177.
- 1209 Goto-Silva, L., McShane, M.P., Salinas, S., Kalaidzidis, Y., Schiavo, G., and Zerial, M. (2019).  
1210 Retrograde transport of Akt by a neuronal Rab5-APPL1 endosome. *Sci Rep* 9, 2433.
- 1211 Guerreiro, R.J., Brown, R., Dian, D., de Goede, C., Bras, J., and Mole, S.E. (2016). Mutation  
1212 of TBCK causes a rare recessive developmental disorder. *Neurol Genet* 2, e76.
- 1213 Hancarova, M., Babikyan, D., Bendova, S., Midyan, S., Prchalova, D., Shahsuvaryan, G.,  
1214 Stranecky, V., Sarkisian, T., and Sedlacek, Z. (2019). A novel variant of C12orf4 in a  
1215 consanguineous Armenian family confirms the etiology of autosomal recessive intellectual  
1216 disability type 66 with delineation of the phenotype. *Mol Genet Genomic Med* 7, e865.
- 1217 Higuchi, Y., Ashwin, P., Roger, Y., and Steinberg, G. (2014). Early endosome motility  
1218 spatially organizes polysome distribution. *J Cell Biol* 204, 343-357.
- 1219 Hoang, D.T., Chernomor, O., von Haeseler, A., Minh, B.Q., and Vinh, L.S. (2018). UFBoot2:  
1220 Improving the Ultrafast Bootstrap Approximation. *Mol Biol Evol* 35, 518-522.
- 1221 Huber, W., von Heydebreck, A., Sultmann, H., Poustka, A., and Vingron, M. (2002). Variance  
1222 stabilization applied to microarray data calibration and to the quantification of differential  
1223 expression. *Bioinformatics* 18 Suppl 1, S96-104.
- 1224 Ignatiadis, N., Klaus, B., Zaugg, J.B., and Huber, W. (2016). Data-driven hypothesis weighting  
1225 increases detection power in genome-scale multiple testing. *Nat Methods* 13, 577-580.
- 1226 Jung, H., Gkogkas, C.G., Sonenberg, N., and Holt, C.E. (2014). Remote control of gene  
1227 function by local translation. *Cell* 157, 26-40.
- 1228 Kaech, S., and Banker, G. (2006). Culturing hippocampal neurons. *Nat Protoc* 1, 2406-2415.
- 1229 Kalaidzidis, Y., Kalaidzidis, I., and Zerial, M. (2015). A probabilistic method to quantify the  
1230 colocalization of markers on intracellular vesicular structures visualized by light microscopy.
- 1231 Kassambara, A. (2020). ggpubr: 'ggplot2' Based Publication Ready Plots ([https://cran.r-](https://cran.r-project.org/web/packages/ggpubr/index.html)  
1232 [project.org/web/packages/ggpubr/index.html](https://cran.r-project.org/web/packages/ggpubr/index.html)).
- 1233 Kim, E., and Jung, H. (2020). Local mRNA translation in long-term maintenance of axon  
1234 health and function. *Curr Opin Neurobiol* 63, 15-22.
- 1235 Lauer, J., Segeletz, S., Cezanne, A., Guaitoli, G., Raimondi, F., Gentzel, M., Alva, V., Habeck,  
1236 M., Kalaidzidis, Y., Ueffing, M., *et al.* (2019). Auto-regulation of Rab5 GEF activity in Rabex5  
1237 by allosteric structural changes, catalytic core dynamics and ubiquitin binding. *Elife* 8.



- 1238 Liao, Y.C., Fernandopulle, M.S., Wang, G., Choi, H., Hao, L., Drerup, C.M., Patel, R., Qamar,  
1239 S., Nixon-Abell, J., Shen, Y., *et al.* (2019). RNA Granules Hitchhike on Lysosomes for Long-  
1240 Distance Transport, Using Annexin A11 as a Molecular Tether. *Cell* *179*, 147-164 e120.
- 1241 Lippe, R., Miaczynska, M., Rybin, V., Runge, A., and Zerial, M. (2001). Functional synergy  
1242 between Rab5 effector Rabaptin-5 and exchange factor Rabex-5 when physically associated in  
1243 a complex. *Mol Biol Cell* *12*, 2219-2228.
- 1244 Loddo, S., Alesi, V., Radio, F.C., Genovese, S., Di Tommaso, S., Calvieri, G., Orlando, V.,  
1245 Bertini, E., Dentici, M.L., Novelli, A., *et al.* (2020). PPP1R21-related syndromic intellectual  
1246 disability: Report of an adult patient and review. *Am J Med Genet A* *182*, 3014-3022.
- 1247 Love, M.I., Huber, W., and Anders, S. (2014). Moderated estimation of fold change and  
1248 dispersion for RNA-seq data with DESeq2. *Genome Biol* *15*, 550.
- 1249 Martin, K.C., and Ephrussi, A. (2009). mRNA localization: gene expression in the spatial  
1250 dimension. *Cell* *136*, 719-730.
- 1251 Moreira, P.I., Carvalho, C., Zhu, X., Smith, M.A., and Perry, G. (2010). Mitochondrial  
1252 dysfunction is a trigger of Alzheimer's disease pathophysiology. *Biochim Biophys Acta* *1802*,  
1253 2-10.
- 1254 Murray, D.H., Jahnel, M., Lauer, J., Avellaneda, M.J., Brouilly, N., Cezanne, A., Morales-  
1255 Navarrete, H., Perini, E.D., Ferguson, C., Lupas, A.N., *et al.* (2016). An endosomal tether  
1256 undergoes an entropic collapse to bring vesicles together. *Nature* *537*, 107-111.
- 1257 Nguyen, L.T., Schmidt, H.A., von Haeseler, A., and Minh, B.Q. (2015). IQ-TREE: a fast and  
1258 effective stochastic algorithm for estimating maximum-likelihood phylogenies. *Mol Biol Evol*  
1259 *32*, 268-274.
- 1260 Nielsen, E., Christoforidis, S., Uttenweiler-Joseph, S., Miaczynska, M., Dewitte, F., Wilm, M.,  
1261 Hoflack, B., and Zerial, M. (2000). Rabenosyn-5, a novel Rab5 effector, is complexed with  
1262 hVPS45 and recruited to endosomes through a FYVE finger domain. *J Cell Biol* *151*, 601-612.
- 1263 Nothwang, H.G., Kim, H.G., Aoki, J., Geisterfer, M., Kubart, S., Wegner, R.D., van Moers,  
1264 A., Ashworth, L.K., Haaf, T., Bell, J., *et al.* (2001). Functional hemizygoty of PAFAH1B3  
1265 due to a PAFAH1B3-CLK2 fusion gene in a female with mental retardation, ataxia and atrophy  
1266 of the brain. *Hum Mol Genet* *10*, 797-806.
- 1267 Ortiz-Gonzalez, X.R., Tintos-Hernandez, J.A., Keller, K., Li, X., Foley, A.R., Bharucha-  
1268 Goebel, D.X., Kessler, S.K., Yum, S.W., Crino, P.B., He, M., *et al.* (2018). Homozygous  
1269 boricua TBCK mutation causes neurodegeneration and aberrant autophagy. *Ann Neurol* *83*,  
1270 153-165.
- 1271 Pagel, M. (1994). Detecting Correlated Evolution on Phylogenies: A General Method for the  
1272 Comparative Analysis of Discrete Characters. *Proceedings of the Royal Society of London*  
1273 *Series B* *255*, 37.
- 1274 Paradis, E., and Schliep, K. (2019). ape 5.0: an environment for modern phylogenetics and  
1275 evolutionary analyses in R. *Bioinformatics* *35*, 526-528.
- 1276 Park, J.S., Davis, R.L., and Sue, C.M. (2018). Mitochondrial Dysfunction in Parkinson's  
1277 Disease: New Mechanistic Insights and Therapeutic Perspectives. *Curr Neurol Neurosci Rep*  
1278 *18*, 21.
- 1279 Pfeffer, S.R. (2013). Rab GTPase regulation of membrane identity. *Curr Opin Cell Biol* *25*,  
1280 414-419.

- 1281 Philips, A.K., Pinelli, M., de Bie, C.I., Mustonen, A., Maatta, T., Arts, H.H., Wu, K., Roepman,  
1282 R., Moilanen, J.S., Raza, S., *et al.* (2017). Identification of C12orf4 as a gene for autosomal  
1283 recessive intellectual disability. *Clin Genet* *91*, 100-105.
- 1284 Popovic, D., Nijenhuis, W., Kapitein, L.C., and Pelkmans, L. (2020). Co-translational targeting  
1285 of transcripts to endosomes. *bioRxiv*.
- 1286 Preibisch, S., Saalfeld, S., and Tomancak, P. (2009). Globally optimal stitching of tiled 3D  
1287 microscopic image acquisitions. *Bioinformatics* *25*, 1463-1465.
- 1288 Quentin, D., Schuhmacher, J.S., Klink, B.U., Lauer, J., Shaikh, T.R., Huis in't Veld, P.J., Welp,  
1289 L., Urlaub, H., Zerial, M., and Raunser, S. (2021). Structure of the human FERRY Rab5  
1290 effector complex.
- 1291 Rangaraju, V., Tom Dieck, S., and Schuman, E.M. (2017). Local translation in neuronal  
1292 compartments: how local is local? *EMBO Rep* *18*, 693-711.
- 1293 Reddy, P.H., Mao, P., and Manczak, M. (2009). Mitochondrial structural and functional  
1294 dynamics in Huntington's disease. *Brain Res Rev* *61*, 33-48.
- 1295 Rehman, A.U., Najafi, M., Kambouris, M., Al-Gazali, L., Makrythanasis, P., Rad, A.,  
1296 Maroofian, R., Rajab, A., Stark, Z., Hunter, J.V., *et al.* (2019). Biallelic loss of function variants  
1297 in PPP1R21 cause a neurodevelopmental syndrome with impaired endocytic function. *Hum*  
1298 *Mutat* *40*, 267-280.
- 1299 Riechmann, V., and Ephrussi, A. (2001). Axis formation during *Drosophila* oogenesis. *Curr*  
1300 *Opin Genet Dev* *11*, 374-383.
- 1301 Ritchie, M.E., Phipson, B., Wu, D., Hu, Y., Law, C.W., Shi, W., and Smyth, G.K. (2015).  
1302 limma powers differential expression analyses for RNA-sequencing and microarray studies.  
1303 *Nucleic Acids Res* *43*, e47.
- 1304 Rozewicki, J., Li, S., Amada, K.M., Standley, D.M., and Katoh, K. (2019). MAFFT-DASH:  
1305 integrated protein sequence and structural alignment. *Nucleic Acids Res* *47*, W5-W10.
- 1306 Schnatwinkel, C., Christoforidis, S., Lindsay, M.R., Uttenweiler-Joseph, S., Wilm, M., Parton,  
1307 R.G., and Zerial, M. (2004). The Rab5 effector Rabankyrin-5 regulates and coordinates  
1308 different endocytic mechanisms. *PLoS Biol* *2*, E261.
- 1309 Sleister, H.M., and Rao, A.G. (2001). Strategies to generate antibodies capable of  
1310 distinguishing between proteins with >90% amino acid identity. *J Immunol Methods* *252*, 121-  
1311 129.
- 1312 Spiegel, A., Bachmann, M., Jurado Jimenez, G., and Sarov, M. (2019). CRISPR/Cas9-based  
1313 knockout pipeline for reverse genetics in mammalian cell culture. *Methods* *164-165*, 49-58.
- 1314 Suleiman, J., Al Hashem, A.M., Tabarki, B., Al-Thihli, K., Bi, W., and El-Hattab, A.W. (2018).  
1315 PPP1R21 homozygous null variants associated with developmental delay, muscle weakness,  
1316 distinctive facial features, and brain abnormalities. *Clin Genet* *94*, 351-355.
- 1317 Tabari, E., and Su, Z. (2017). PorthoMCL: Parallel orthology prediction using MCL for the  
1318 realm of massive genome availability. *Big Data Anal* *2*.
- 1319 Team, R.C. (2019). R: A language and environment for statistical computing. R Foundation  
1320 for Statistical Computing.
- 1321 Turner-Bridger, B., Caterino, C., and Cioni, J.M. (2020). Molecular mechanisms behind  
1322 mRNA localization in axons. *Open Biol* *10*, 200177.

- 1323 UniProt, C. (2019). UniProt: a worldwide hub of protein knowledge. *Nucleic Acids Res* *47*,  
1324 D506-D515.
- 1325 Wandinger-Ness, A., and Zerial, M. (2014). Rab proteins and the compartmentalization of the  
1326 endosomal system. *Cold Spring Harb Perspect Biol* *6*, a022616.
- 1327 Whelan, S., and Goldman, N. (2001). A general empirical model of protein evolution derived  
1328 from multiple protein families using a maximum-likelihood approach. *Mol Biol Evol* *18*, 691-  
1329 699.
- 1330 Wickham, H. (2016). *ggplot2: Elegant Graphics for Data Analysis* (Springer-Verlag New  
1331 York).
- 1332 Wilson, J.M., de Hoop, M., Zorzi, N., Toh, B.H., Dotti, C.G., and Parton, R.G. (2000). EEA1,  
1333 a tethering protein of the early sorting endosome, shows a polarized distribution in  
1334 hippocampal neurons, epithelial cells, and fibroblasts. *Mol Biol Cell* *11*, 2657-2671.
- 1335 Yates, A.D., Achuthan, P., Akanni, W., Allen, J., Allen, J., Alvarez-Jarreta, J., Amode, M.R.,  
1336 Armean, I.M., Azov, A.G., Bennett, R., *et al.* (2020). Ensembl 2020. *Nucleic Acids Res* *48*,  
1337 D682-D688.
- 1338 Young, G., Hundt, N., Cole, D., Fineberg, A., Andrecka, J., Tyler, A., Olerinyova, A., Ansari,  
1339 A., Marklund, E.G., Collier, M.P., *et al.* (2018). Quantitative mass imaging of single biological  
1340 macromolecules. *Science* *360*, 423-427.
- 1341 Yu, G., Lam, T.T., Zhu, H., and Guan, Y. (2018). Two Methods for Mapping and Visualizing  
1342 Associated Data on Phylogeny Using Ggtree. *Mol Biol Evol* *35*, 3041-3043.
- 1343 Yu, G., Smith, D.K., Zhu, H., Guan, Y., and Lam, T.T.-Y. (2017). ggtree: an r package for  
1344 visualization and annotation of phylogenetic trees with their covariates and other associated  
1345 data. *Methods in Ecology and Evolution* *8*, 28-36.
- 1346 Zapata-Aldana, E., Kim, D.D., Remtulla, S., Prasad, C., Nguyen, C.T., and Campbell, C.  
1347 (2019). Further delineation of TBCK - Infantile hypotonia with psychomotor retardation and  
1348 characteristic facies type 3. *Eur J Med Genet* *62*, 273-277.
- 1349 Zhang, J., Reiling, C., Reinecke, J.B., Prislán, I., Marky, L.A., Sorgen, P.L., Naslavsky, N.,  
1350 and Caplan, S. (2012). Rabankyrin-5 interacts with EHD1 and Vps26 to regulate endocytic  
1351 trafficking and retromer function. *Traffic* *13*, 745-757.
- 1352 Zhang, X., Smits, A.H., van Tilburg, G.B., Ovaa, H., Huber, W., and Vermeulen, M. (2018).  
1353 Proteome-wide identification of ubiquitin interactions using UbIA-MS. *Nat Protoc* *13*, 530-  
1354 550.
- 1355
